# Supplementary material
Source: ML conference proceedings conference paper supplement (https://openaccess.thecvf.com/content/cvpr_2016/html/Radenovic_From_Dusk_Till_2016_CVPR_paper.html)

# From Dusk till Dawn: Modeling in the Dark

Filip Radenović, Johannes L. Schönberger, Dinghuang Ji,  
Jan-Michael Frahm, Ondřej Chum, Jiří Matas

# Color artifacts with standard dense reconstruction from Day+Night images

Day+Night

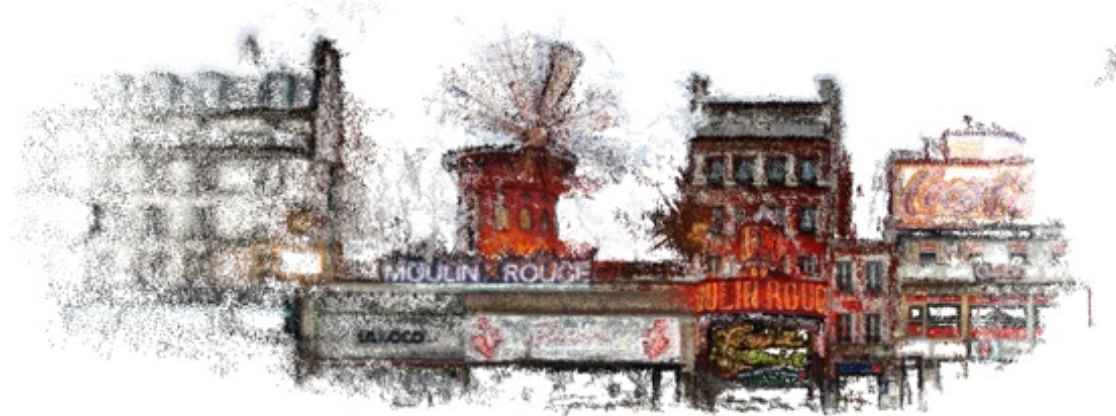

Day-only

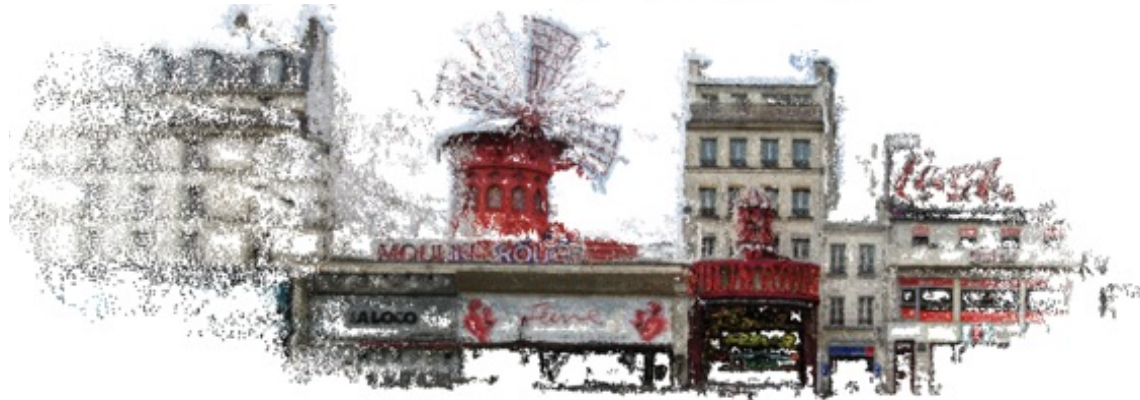

Night-only

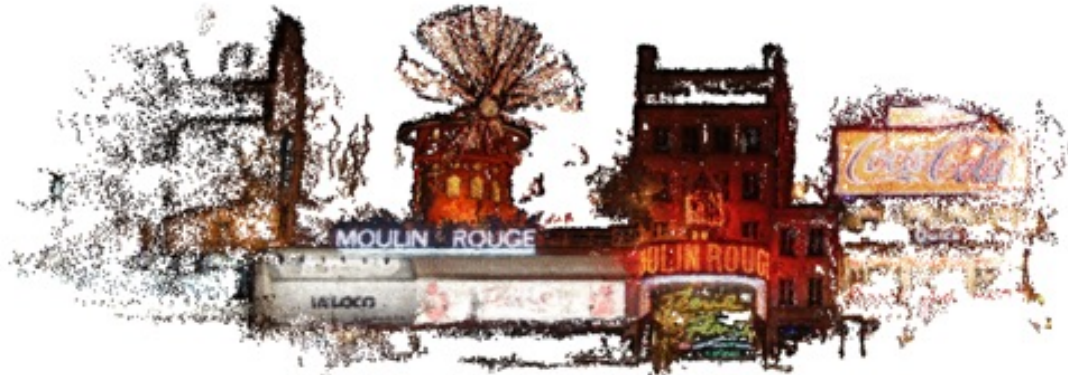

# Color artifacts with standard dense reconstruction from Day+Night images

Day+Night

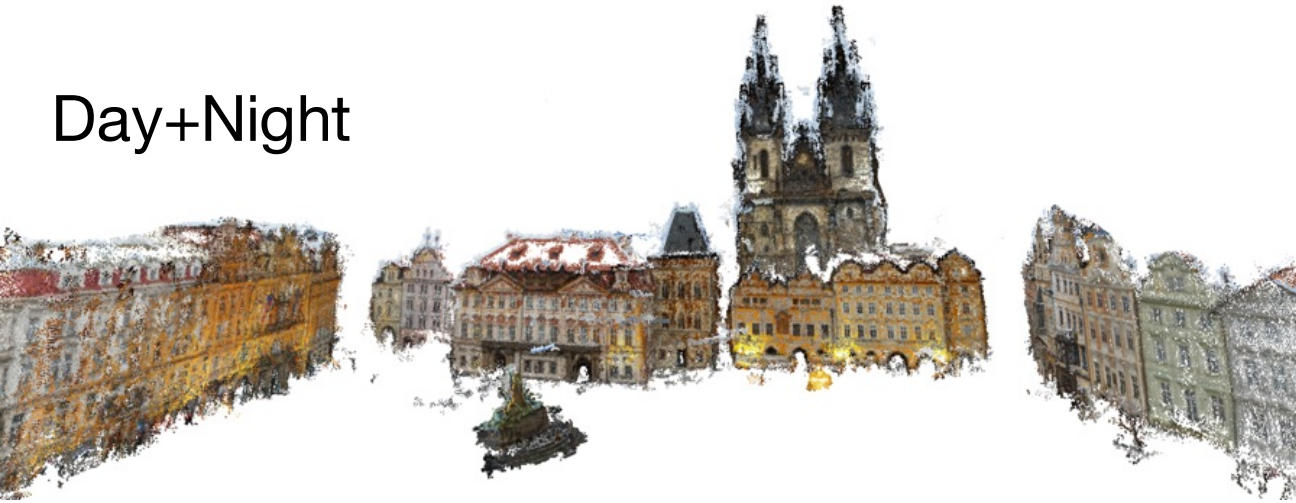

Day-only

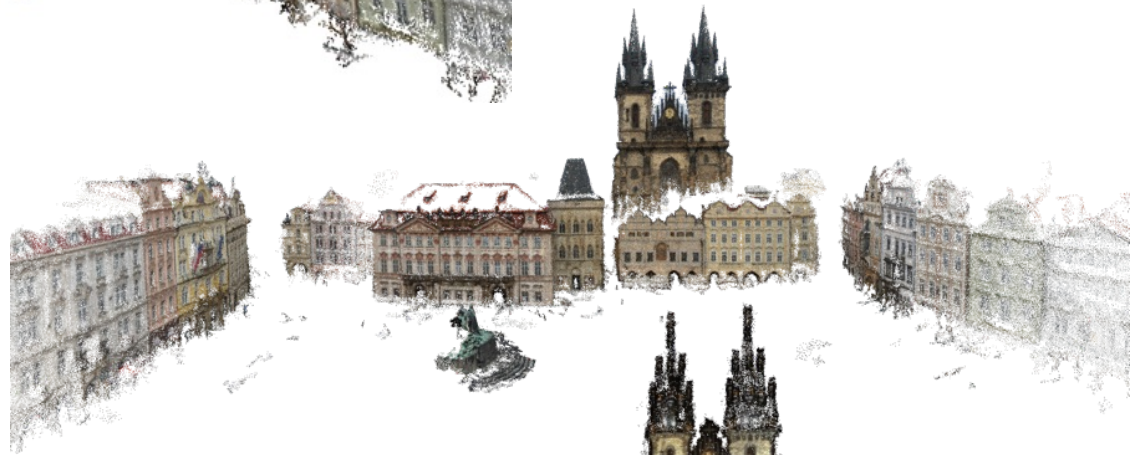

Night-only

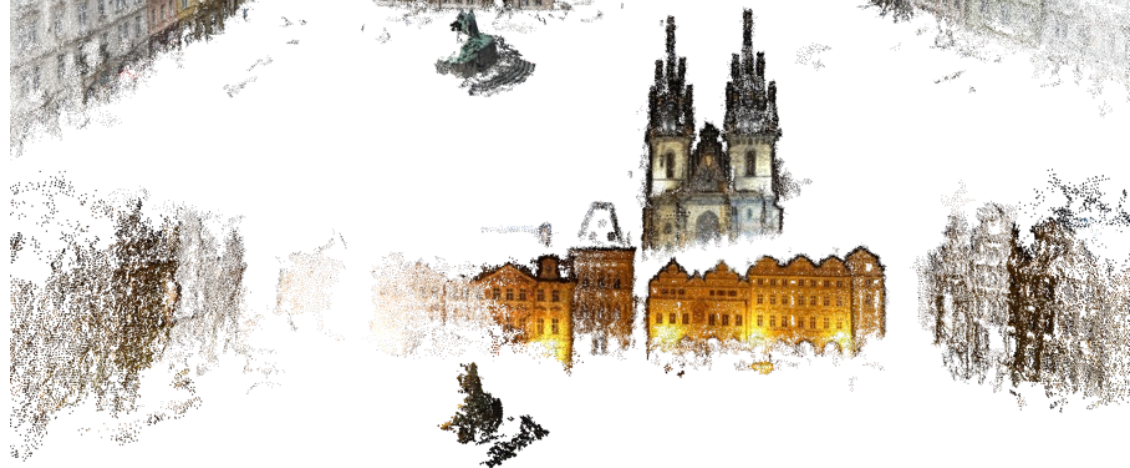

# Color artifacts with standard dense reconstruction from Day+Night images

Day+Night

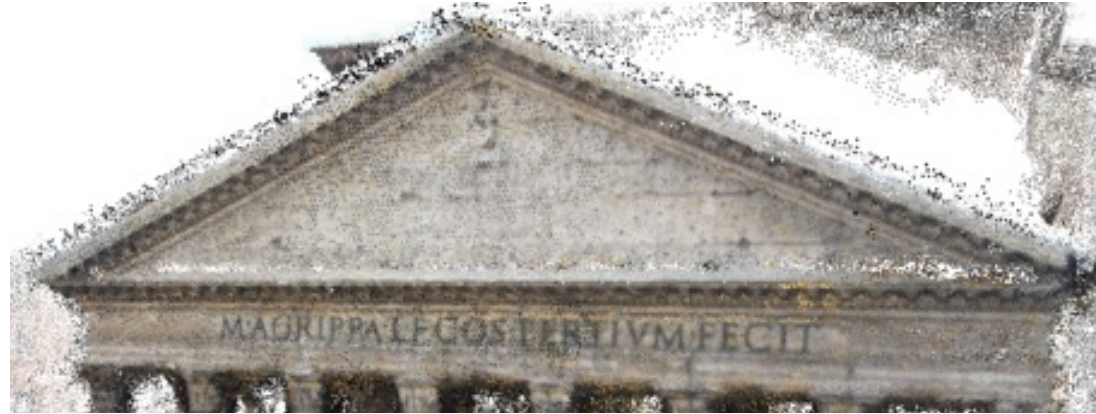

Day-only

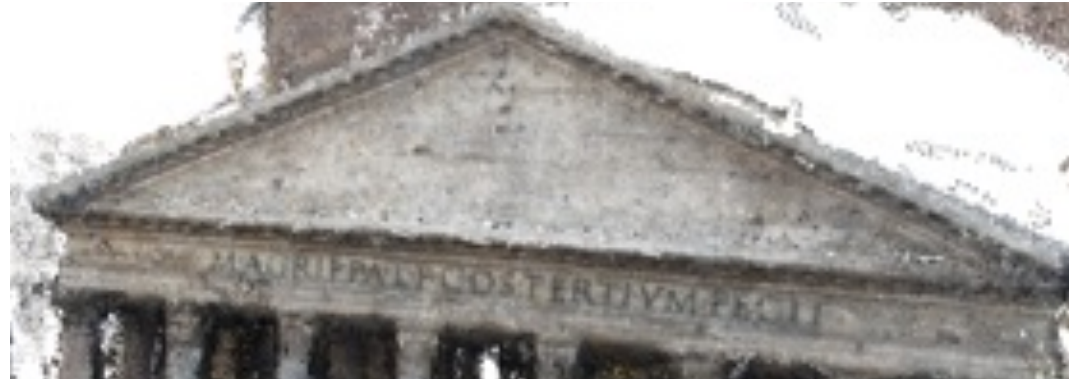

Night-only

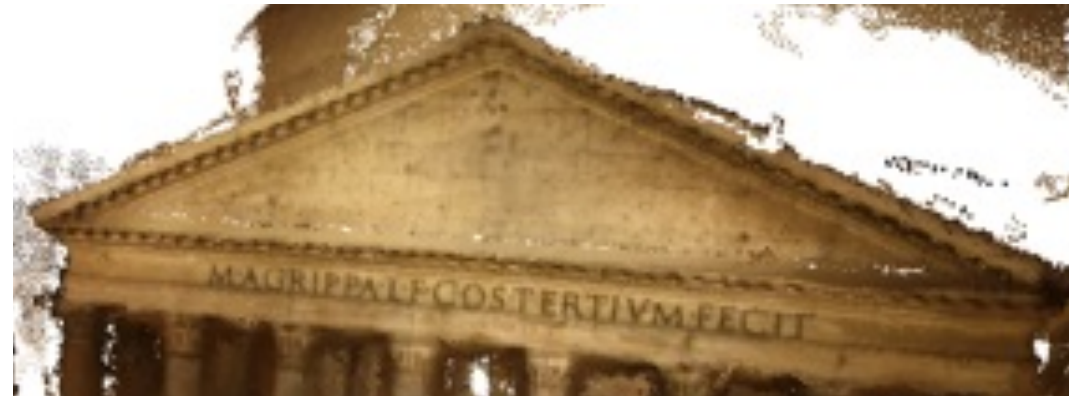

Trevi Fountain, Rome

Day-only

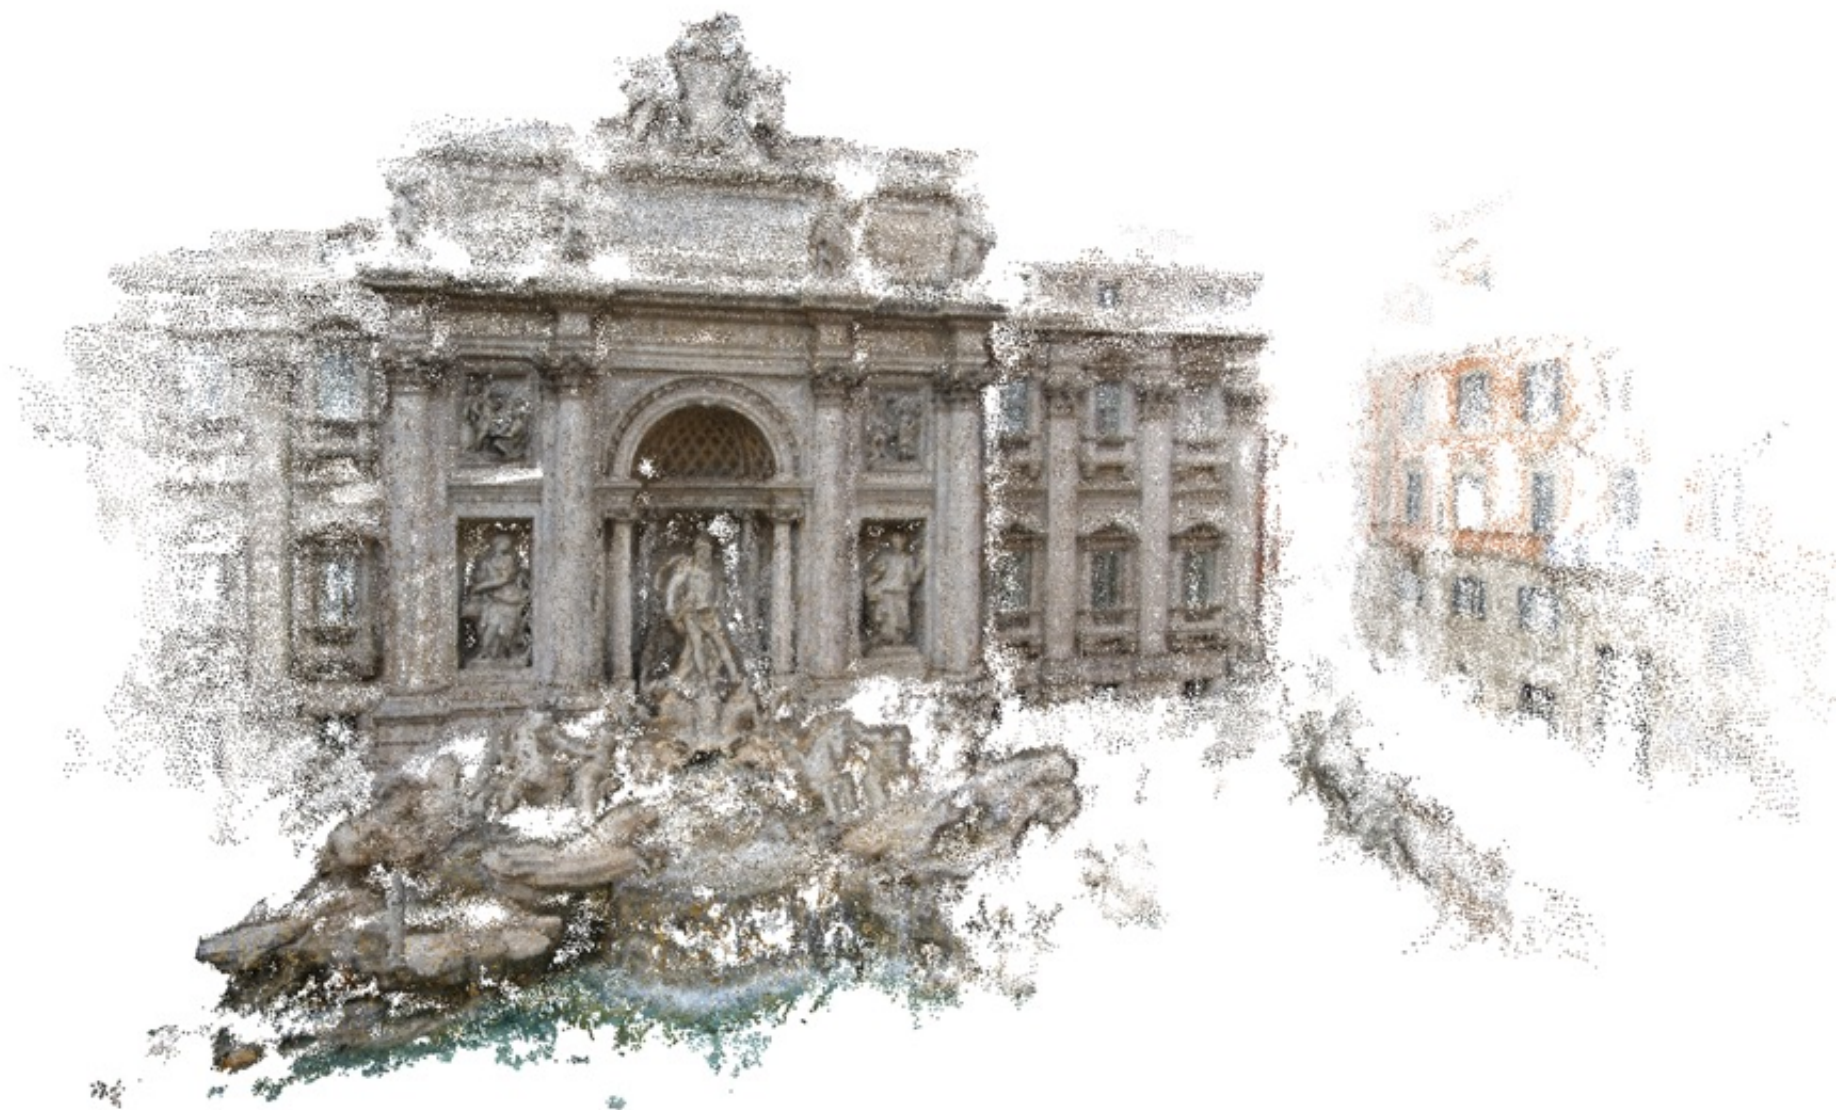

Night-only

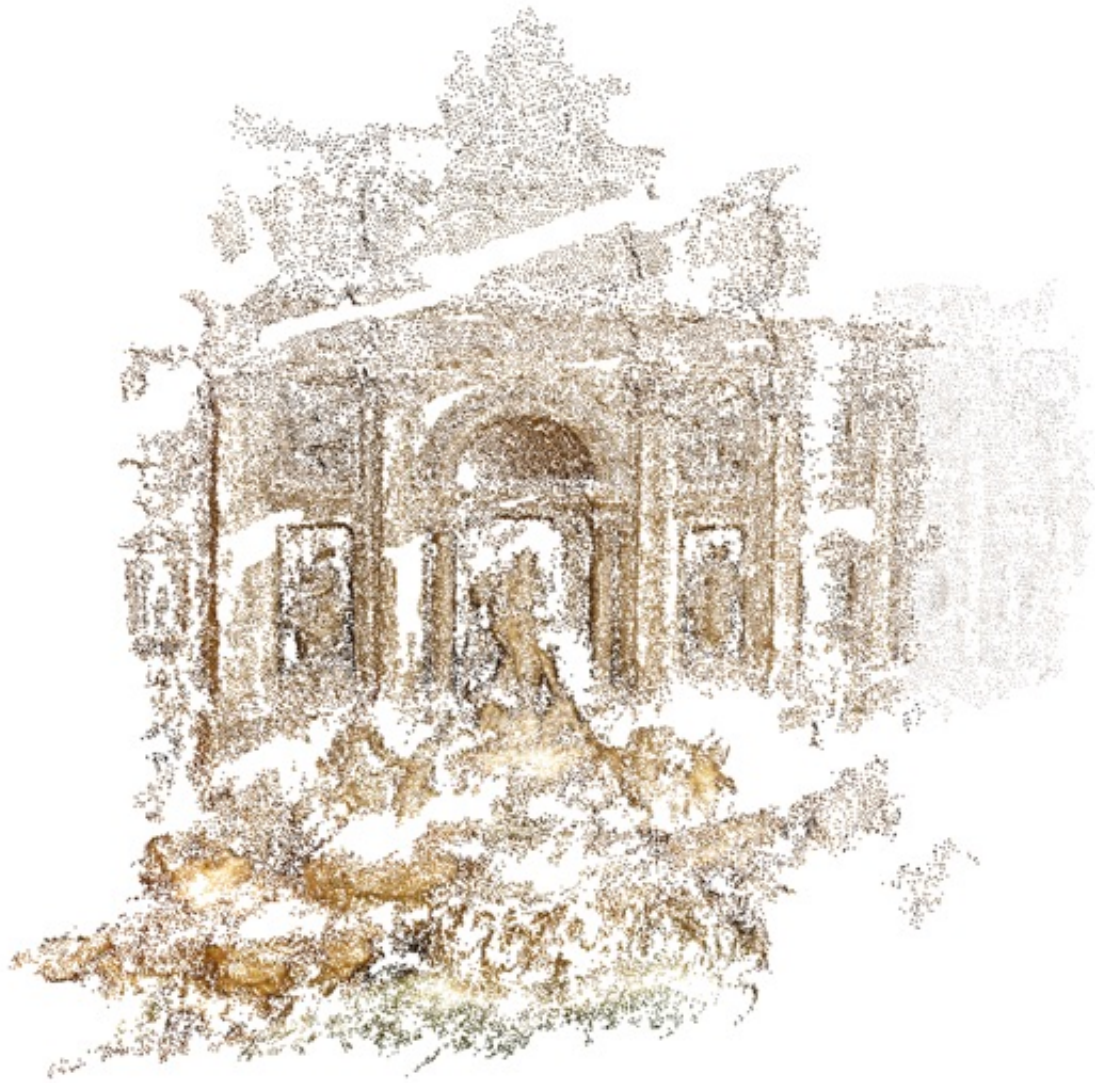

Repainted

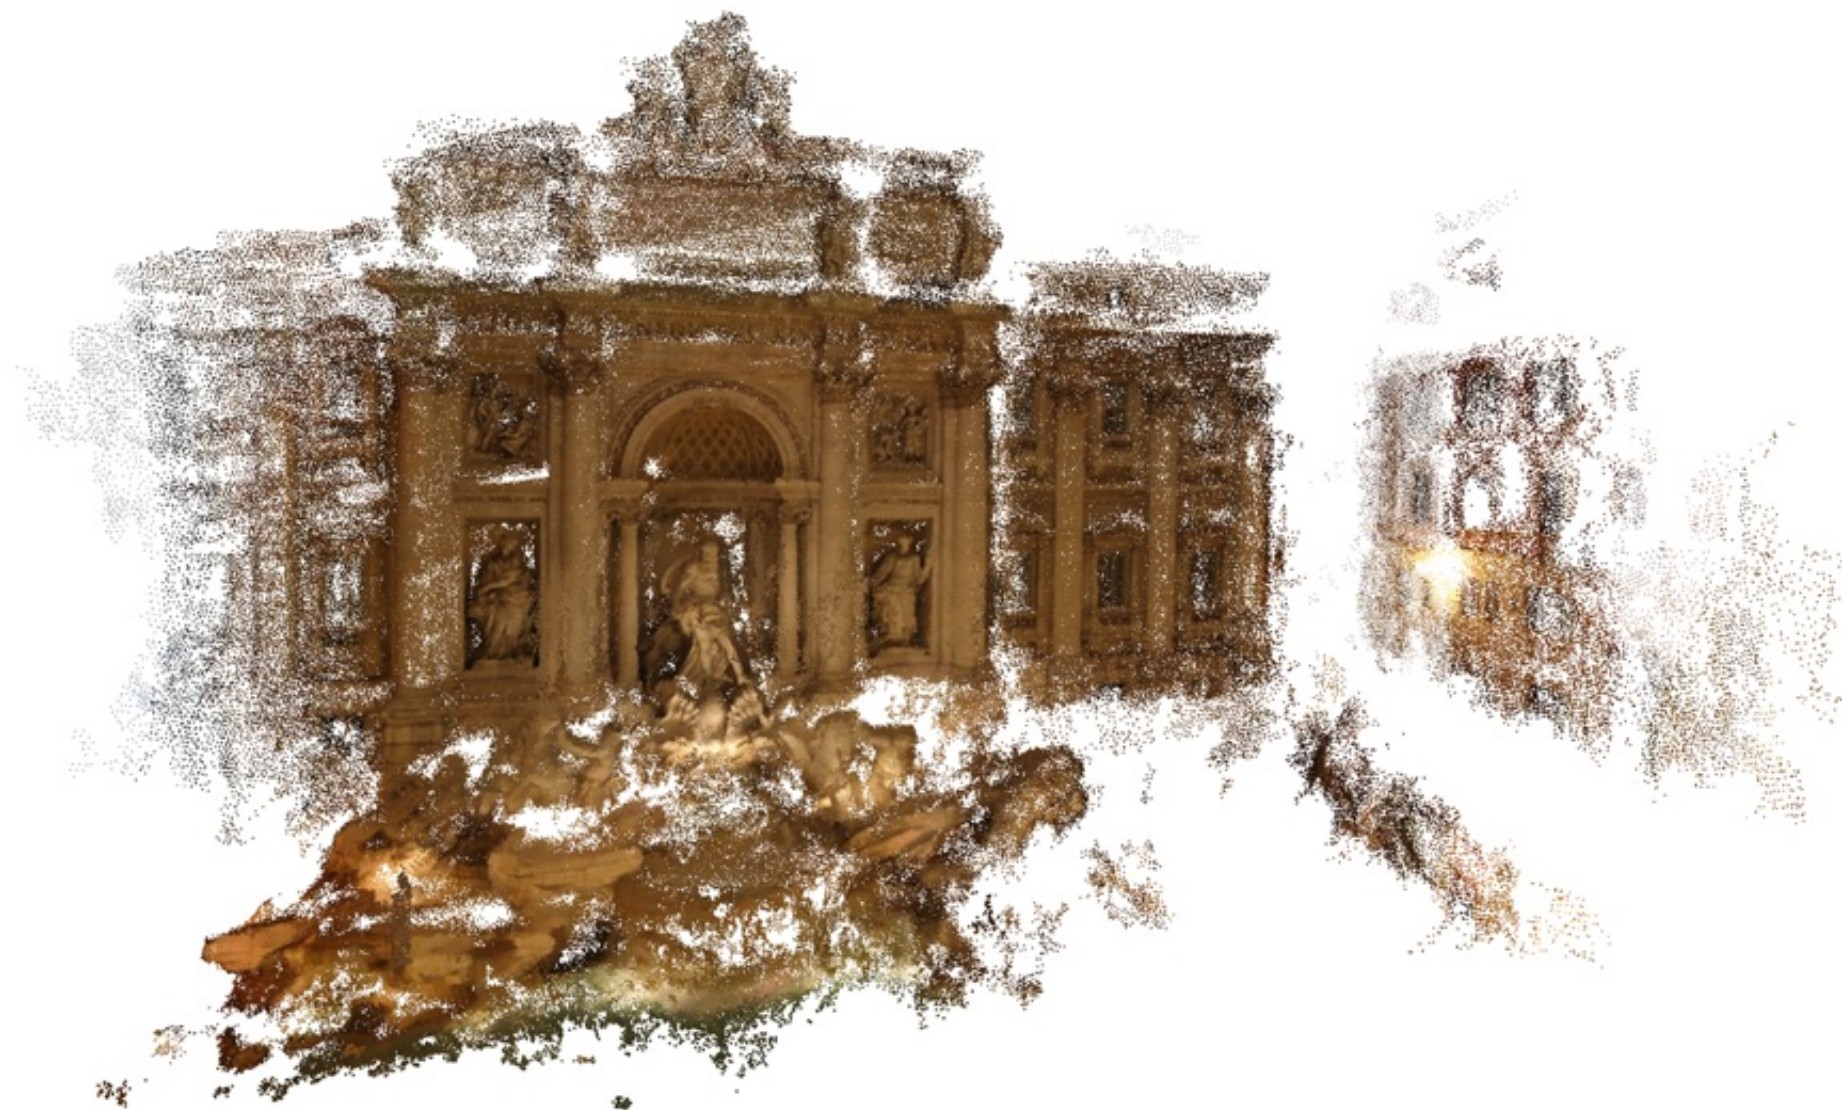

# Repainted+Inpainted+Blended

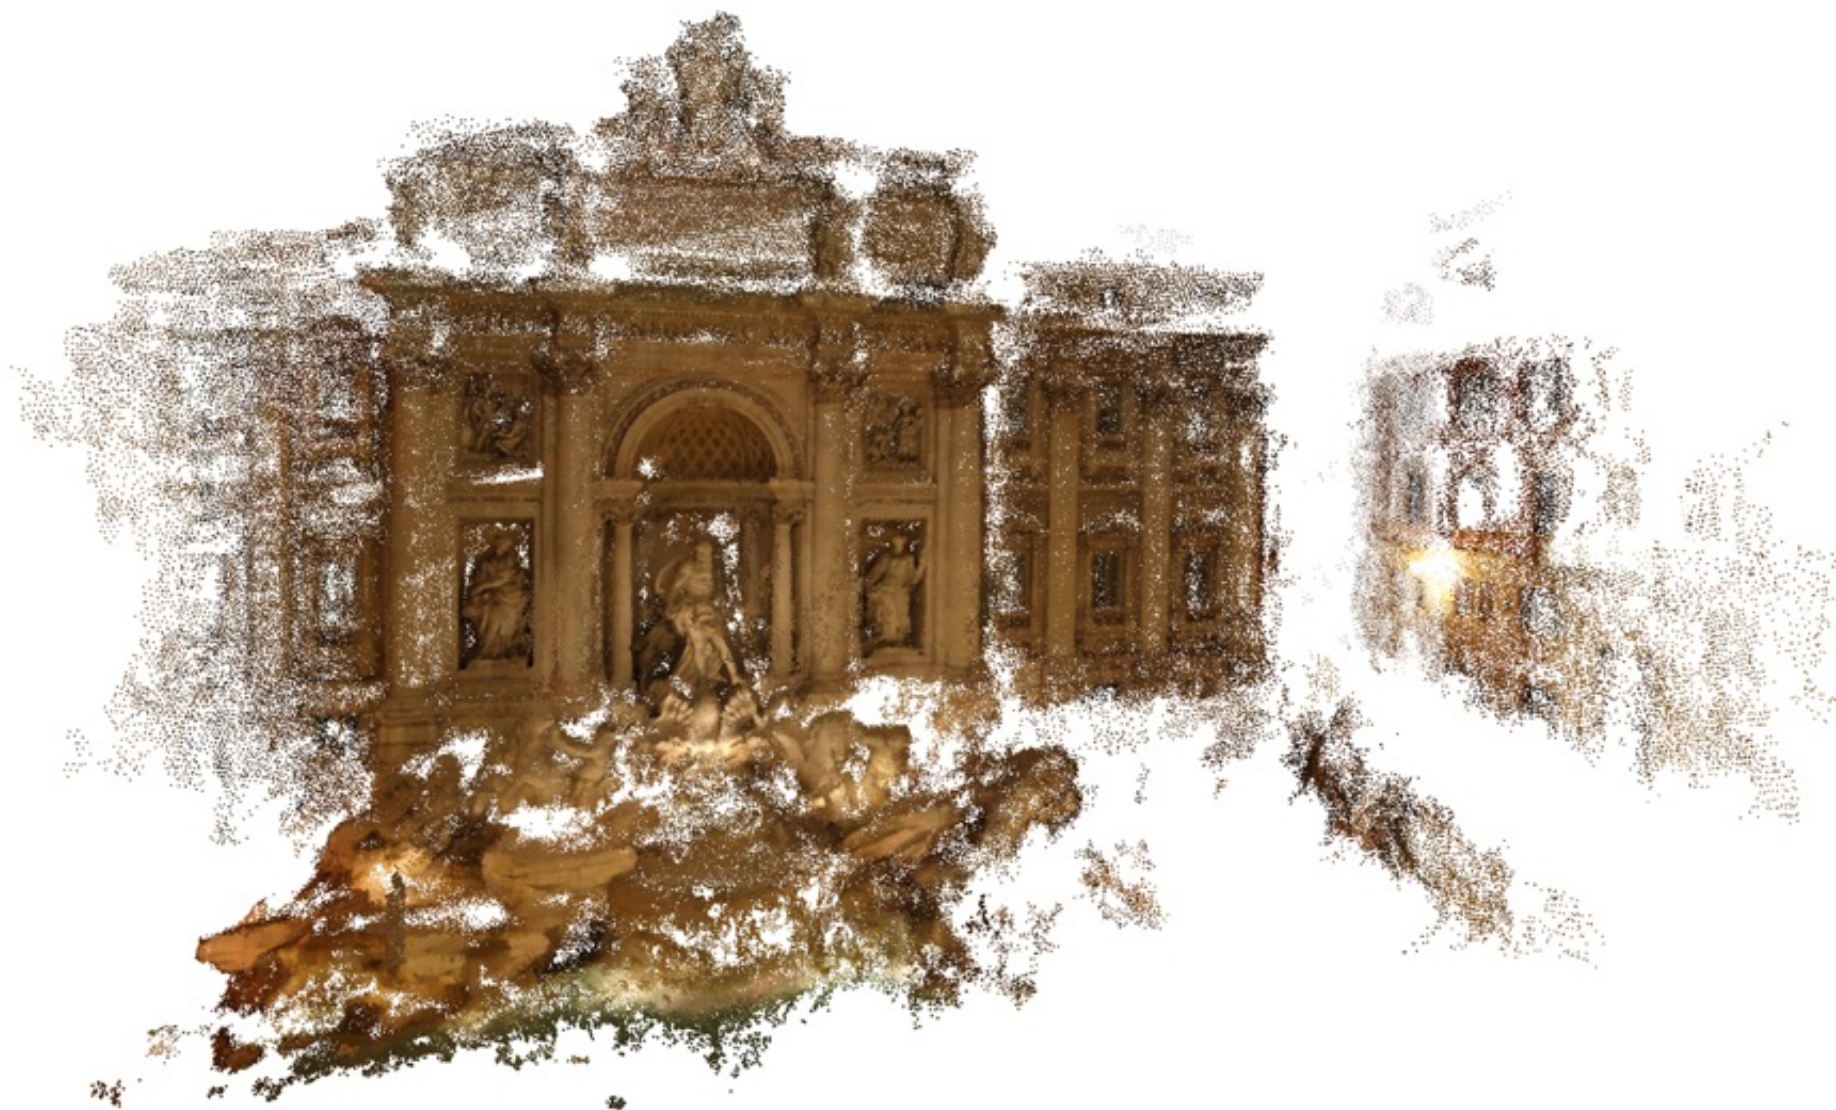

Sagrada Familia, Barcelona

Day-only

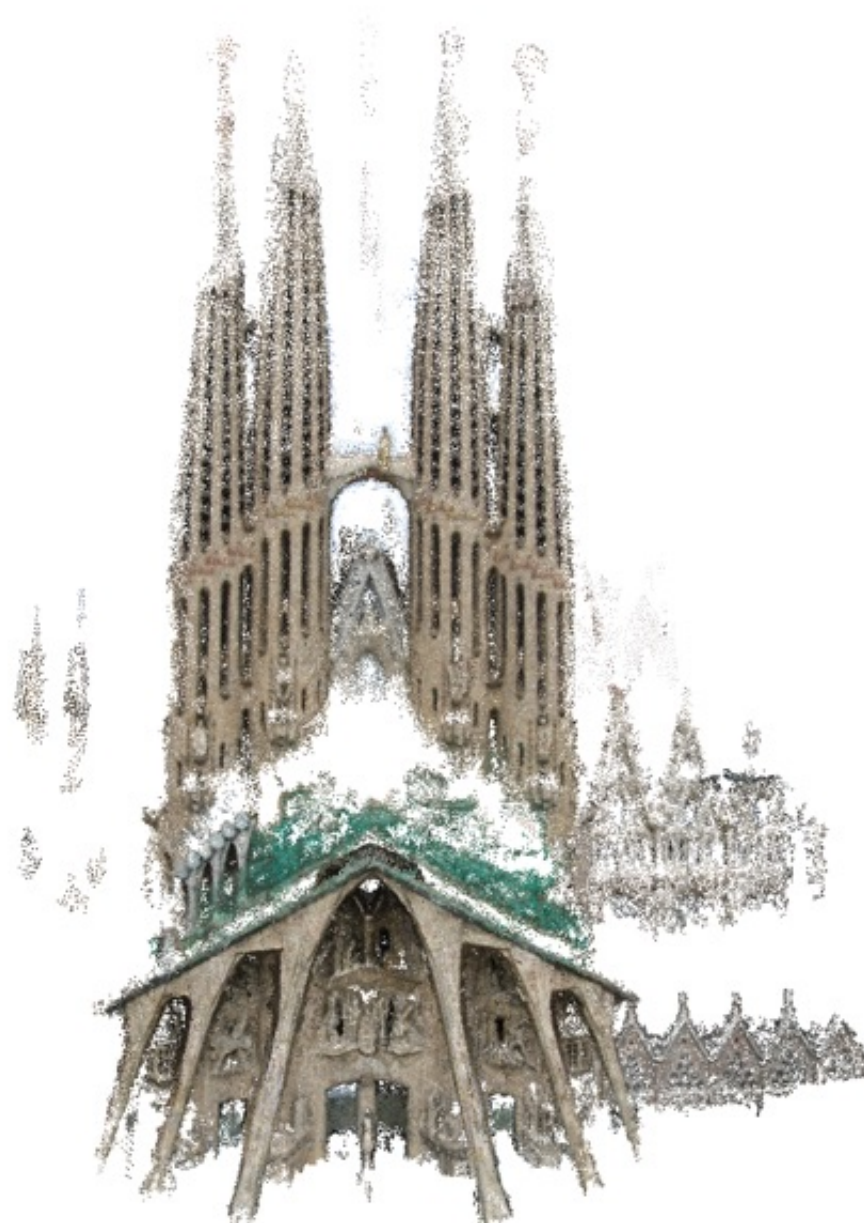

Night-only

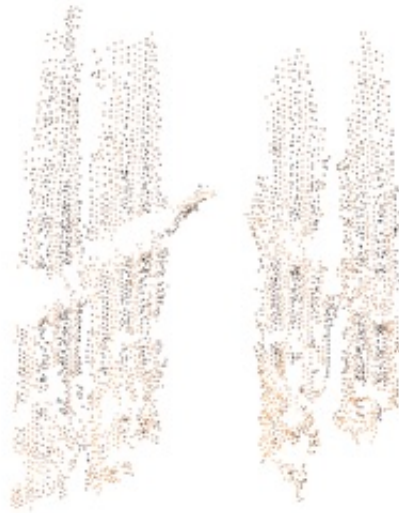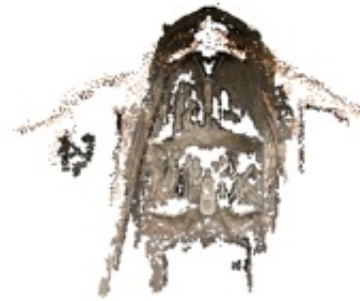

Repainted

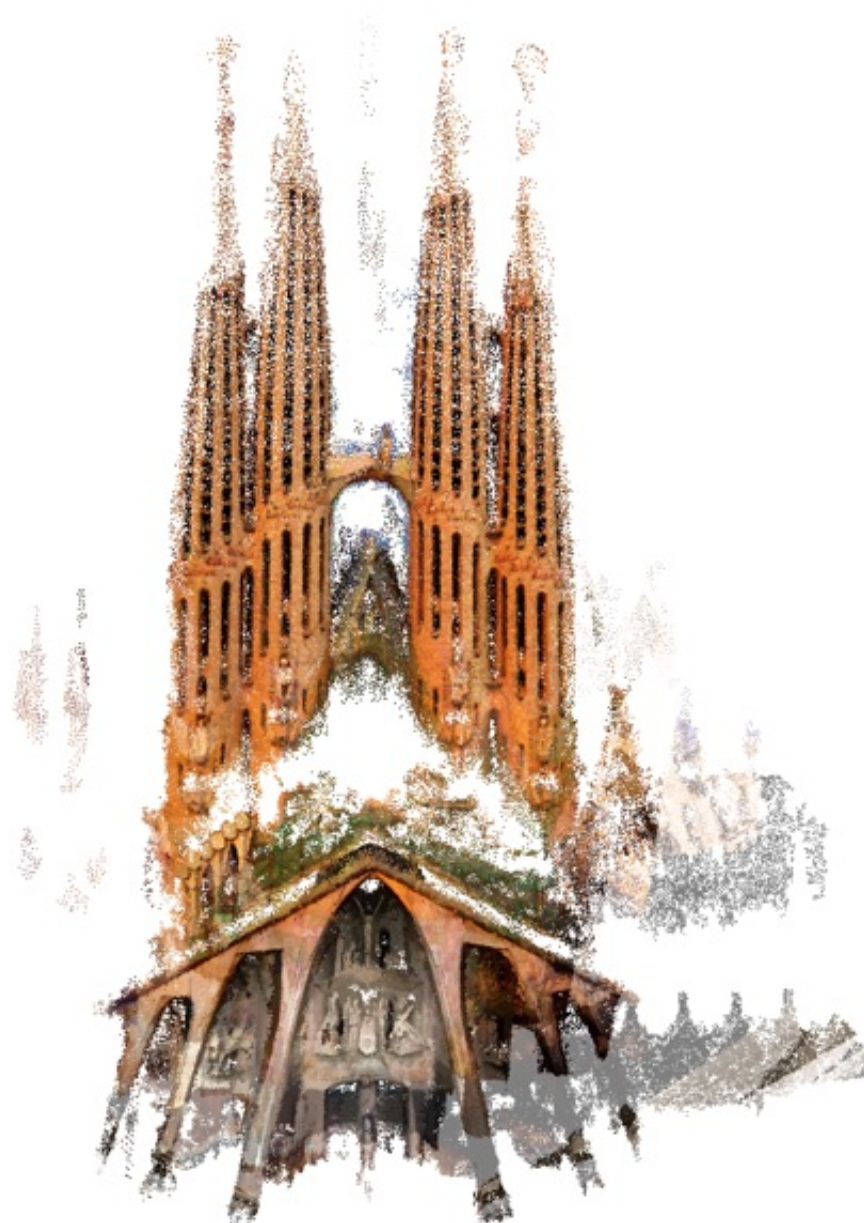

# Repainted+Inpainted+Blended

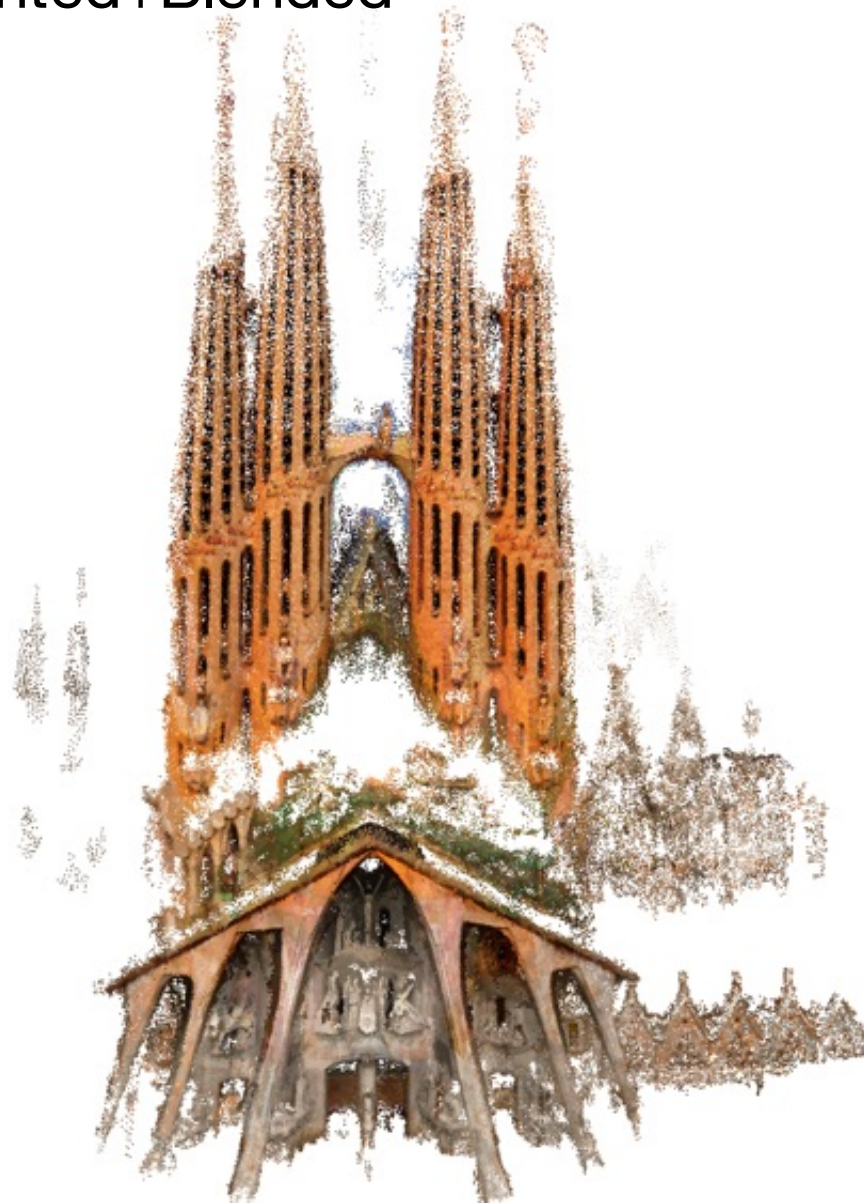

# St. Vitus Cathedral, Prague

Day-only

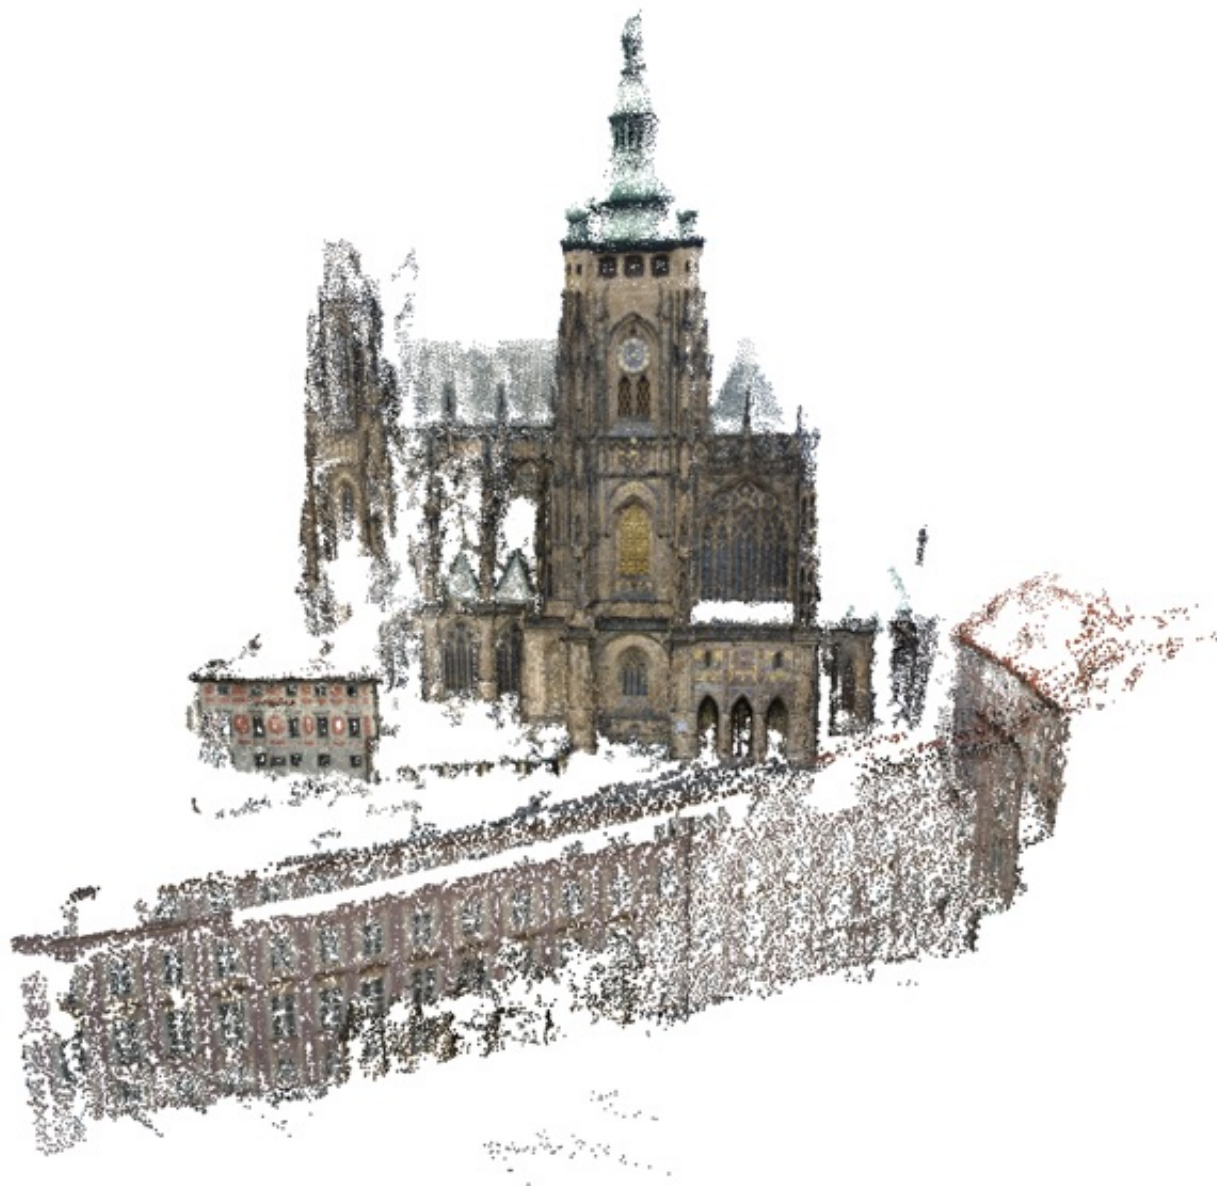

Night-only

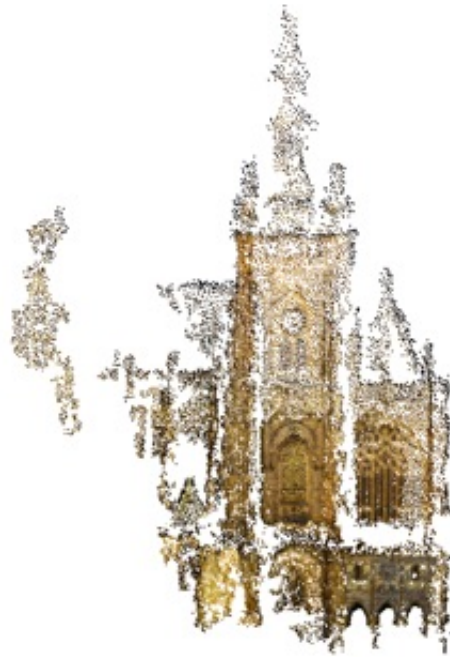

Repainted

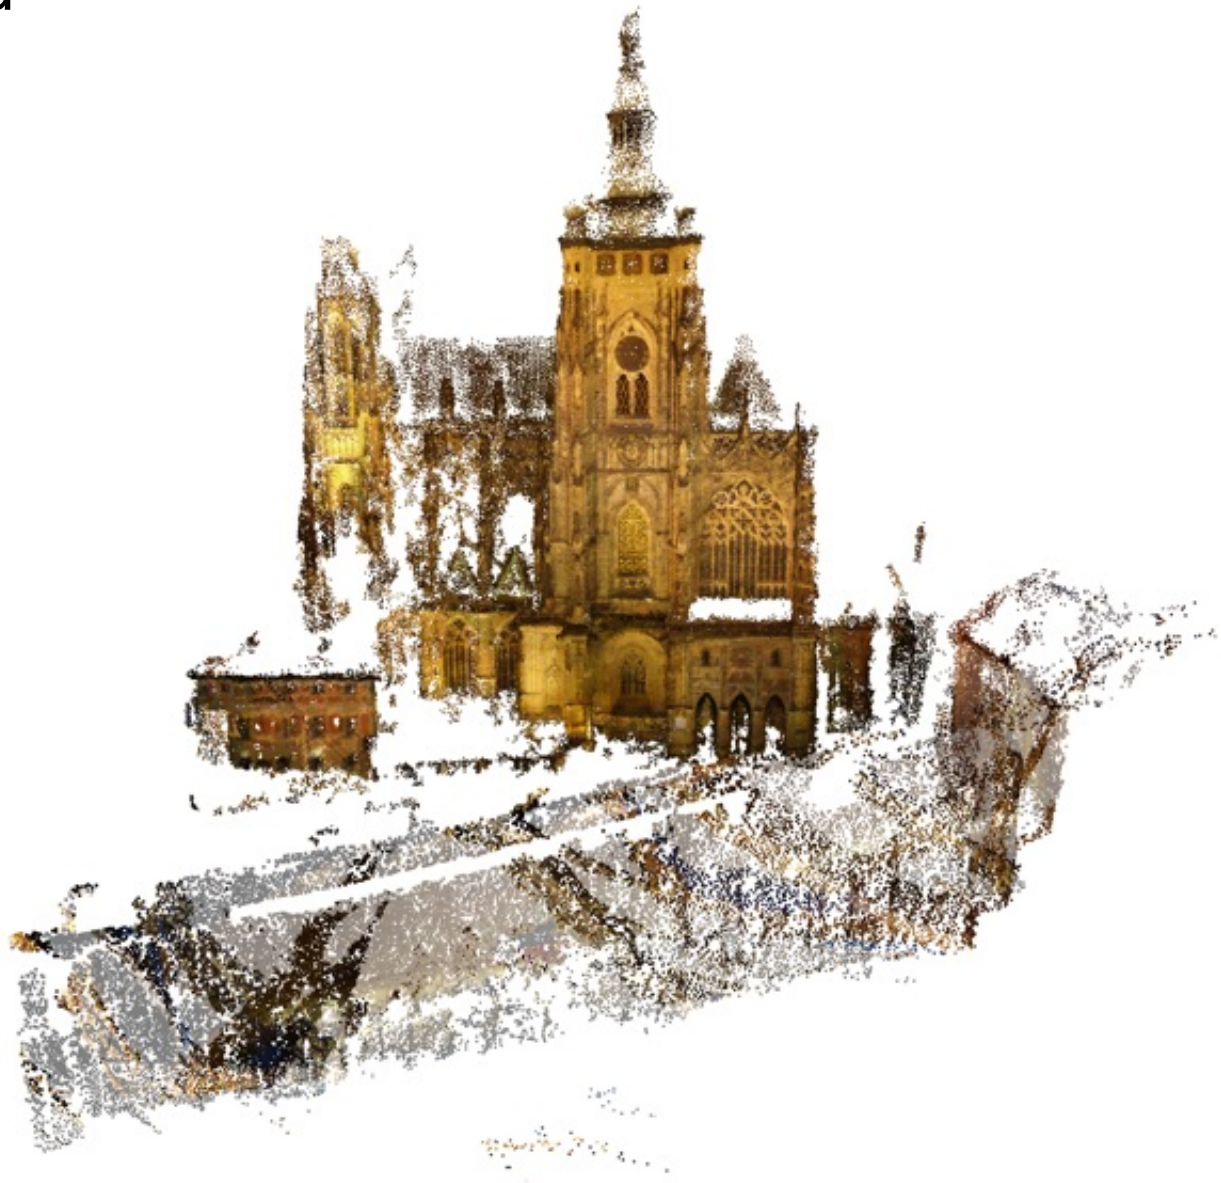

Repainted+Inpainted+Blended

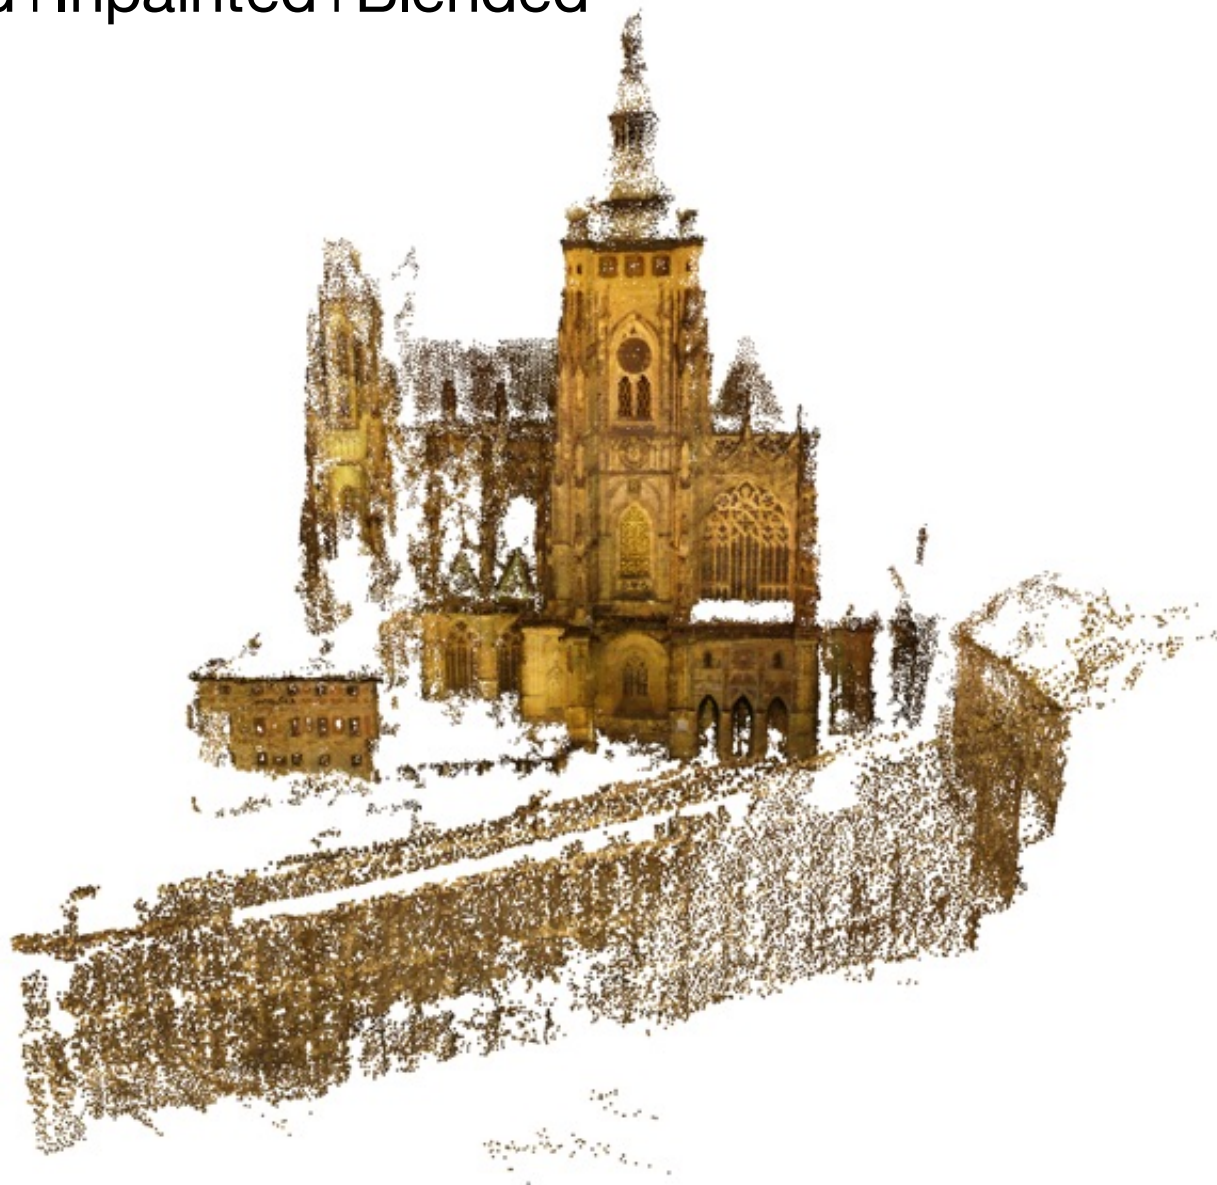

Plaça del Rei, Barcelona

Day-only

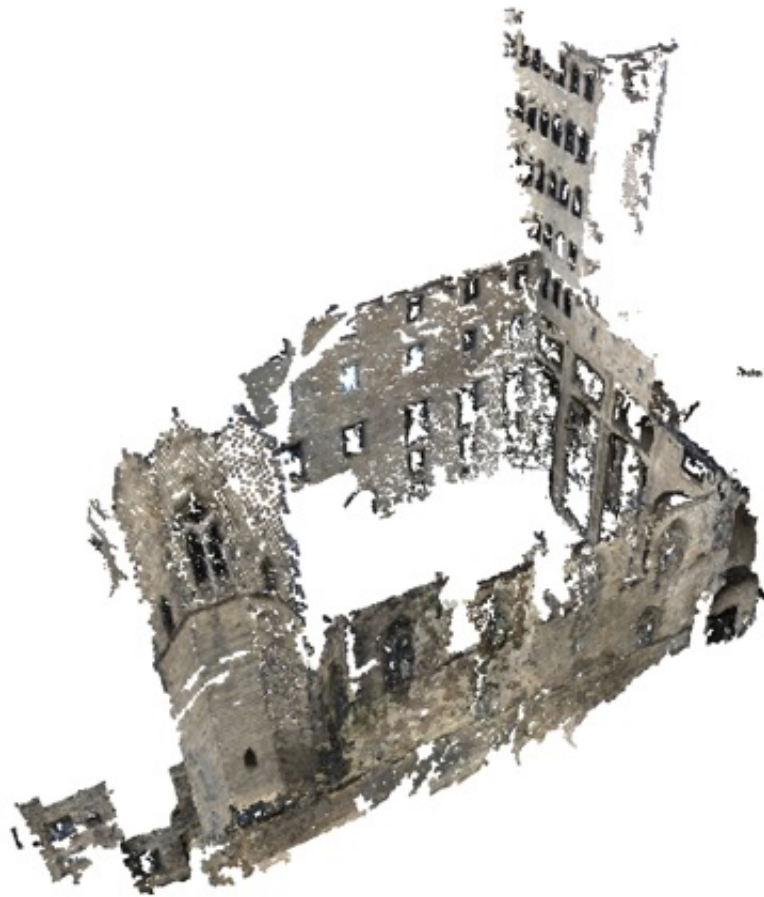

Night-only

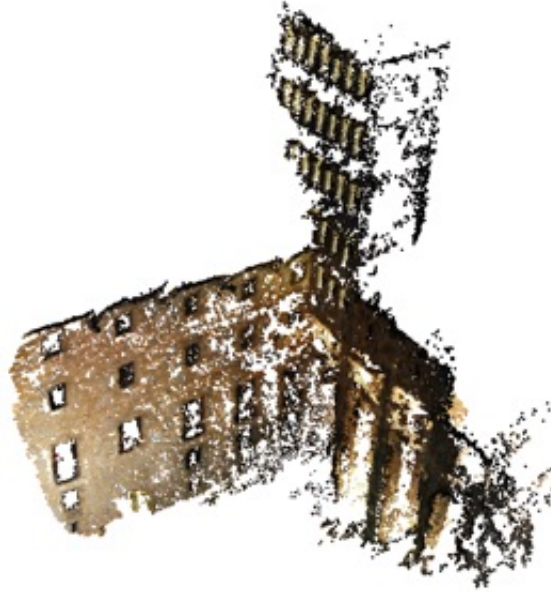

Repainted

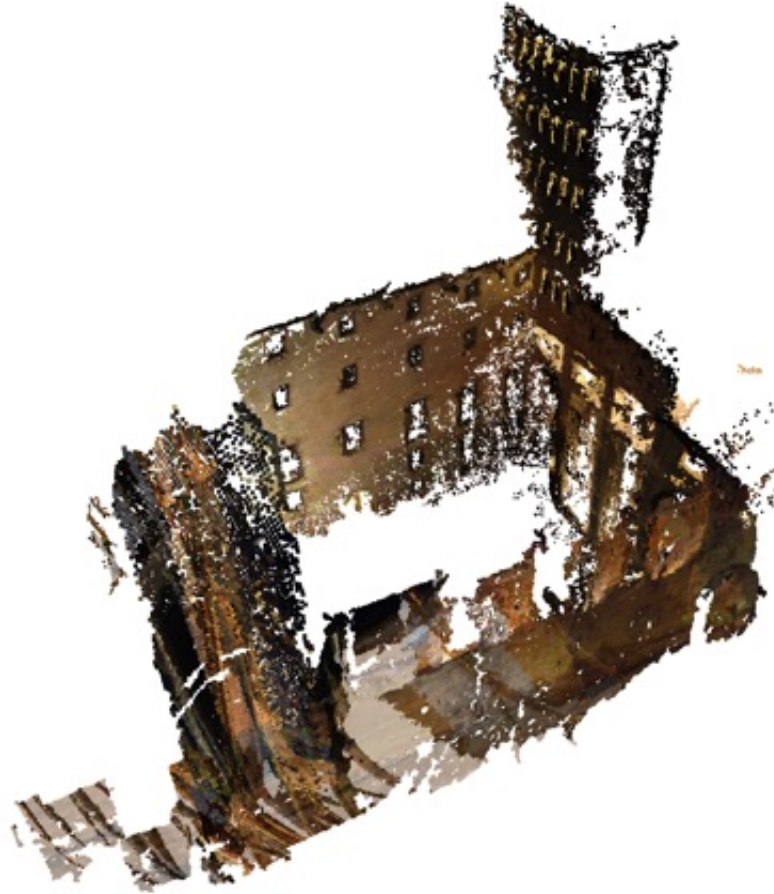

# Repainted+Inpainted+Blended

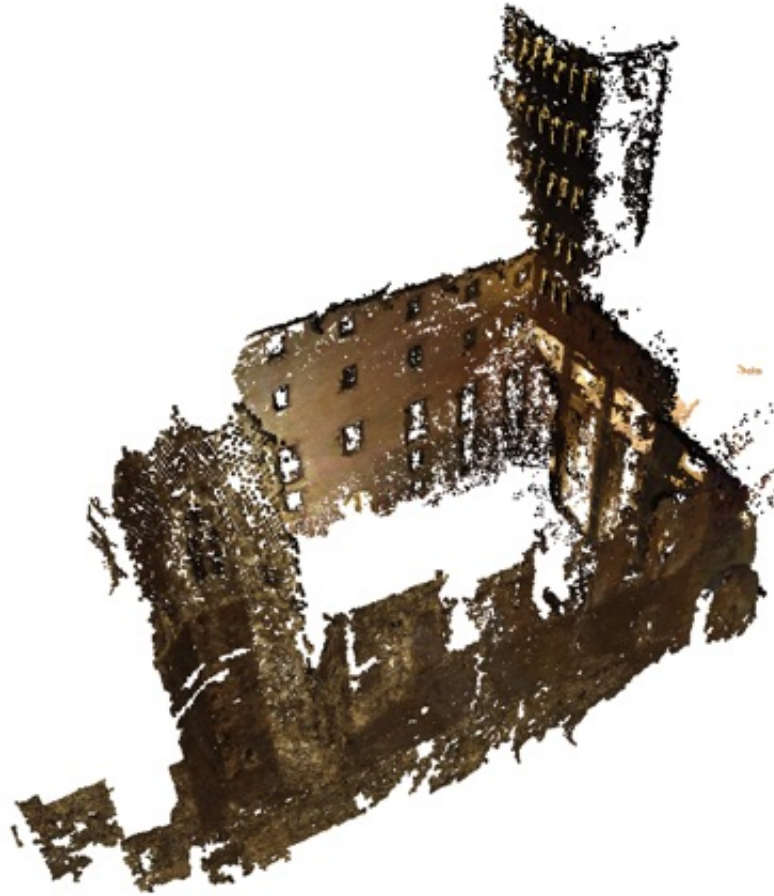

Castel Sant'Angelo, Rome

Day-only

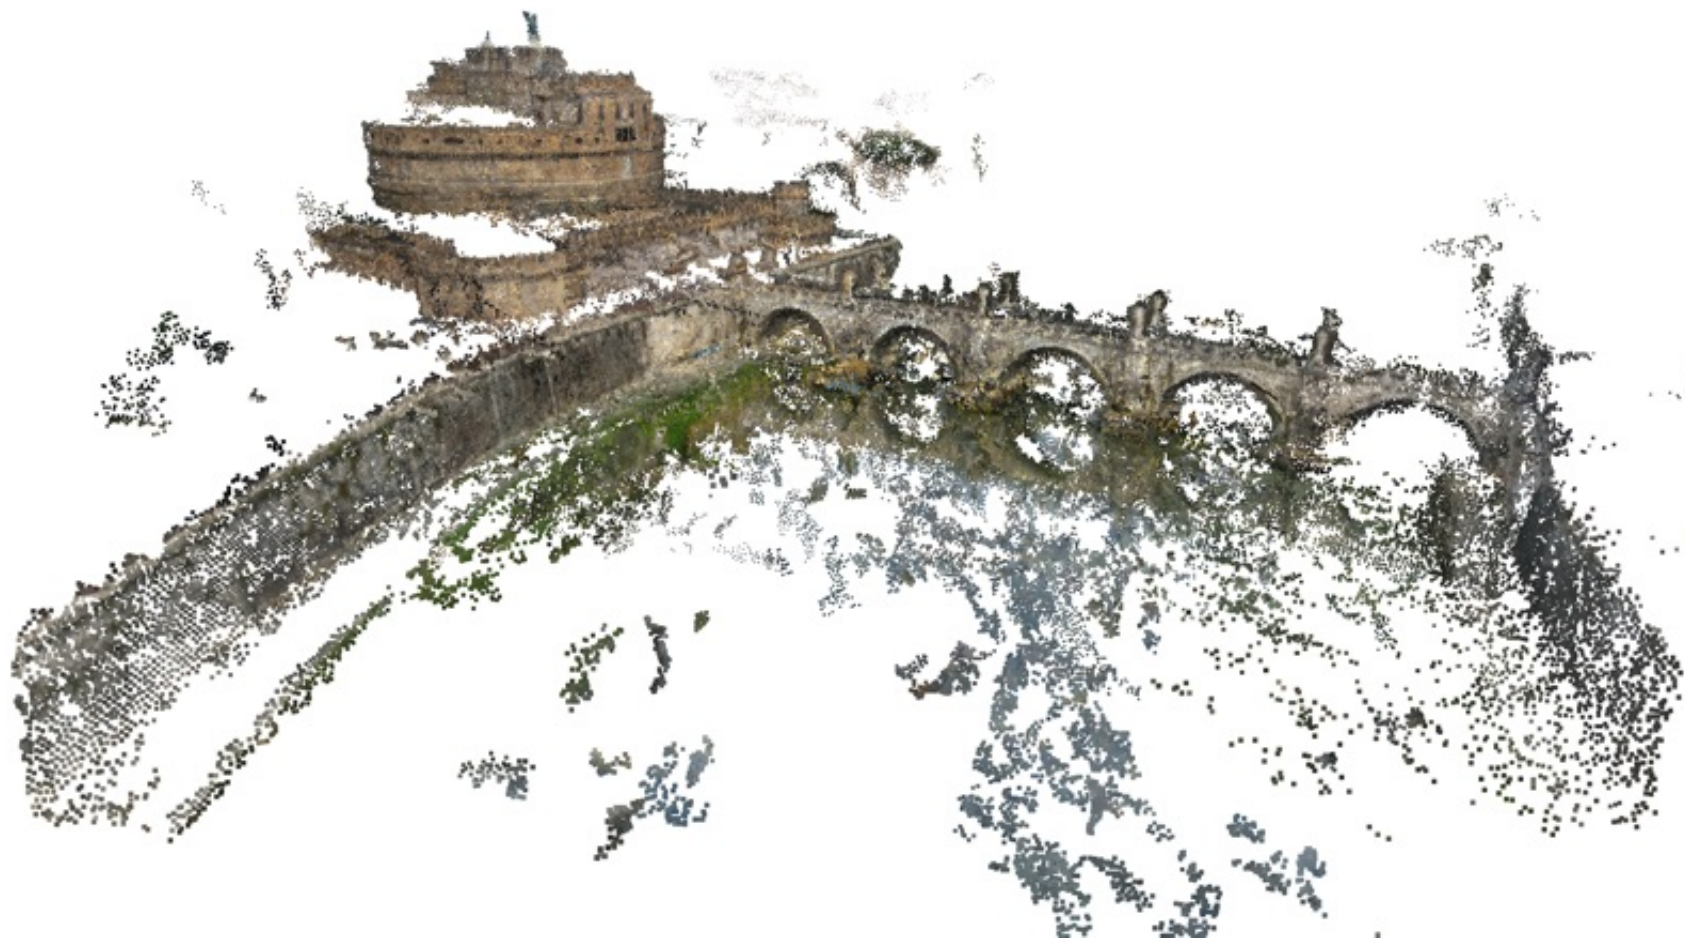

Night-only

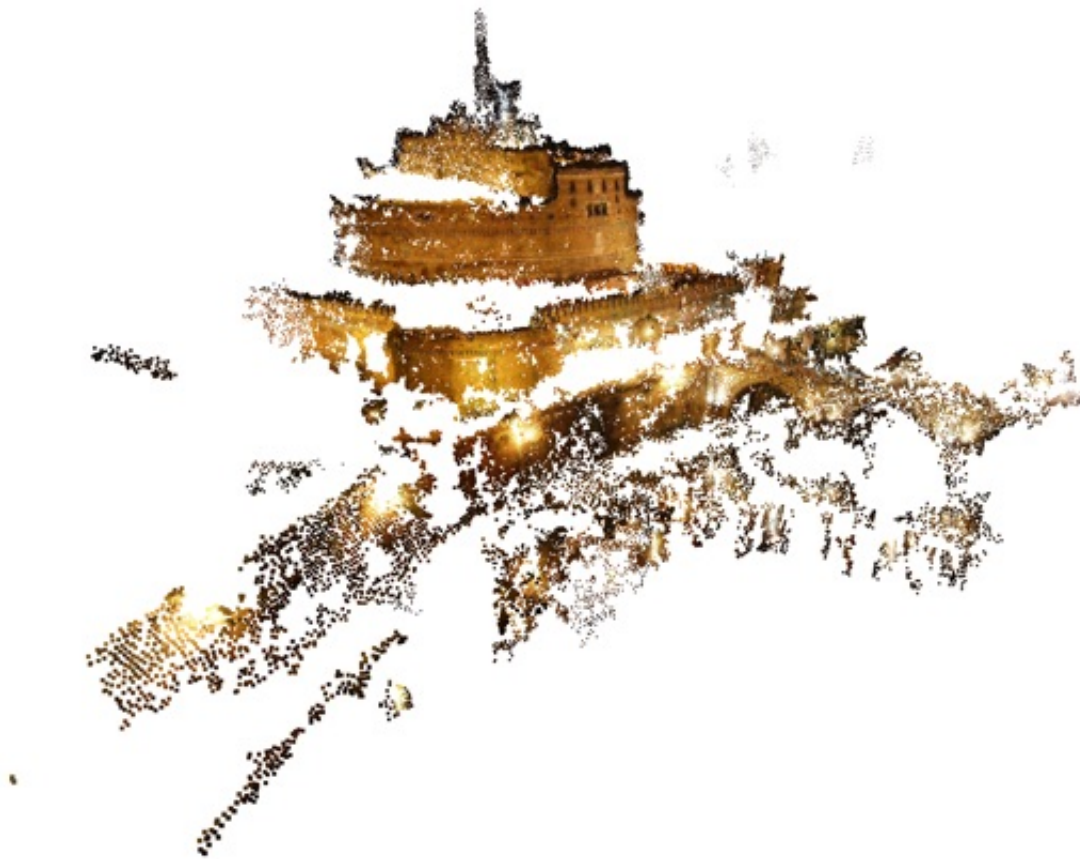

Repainted

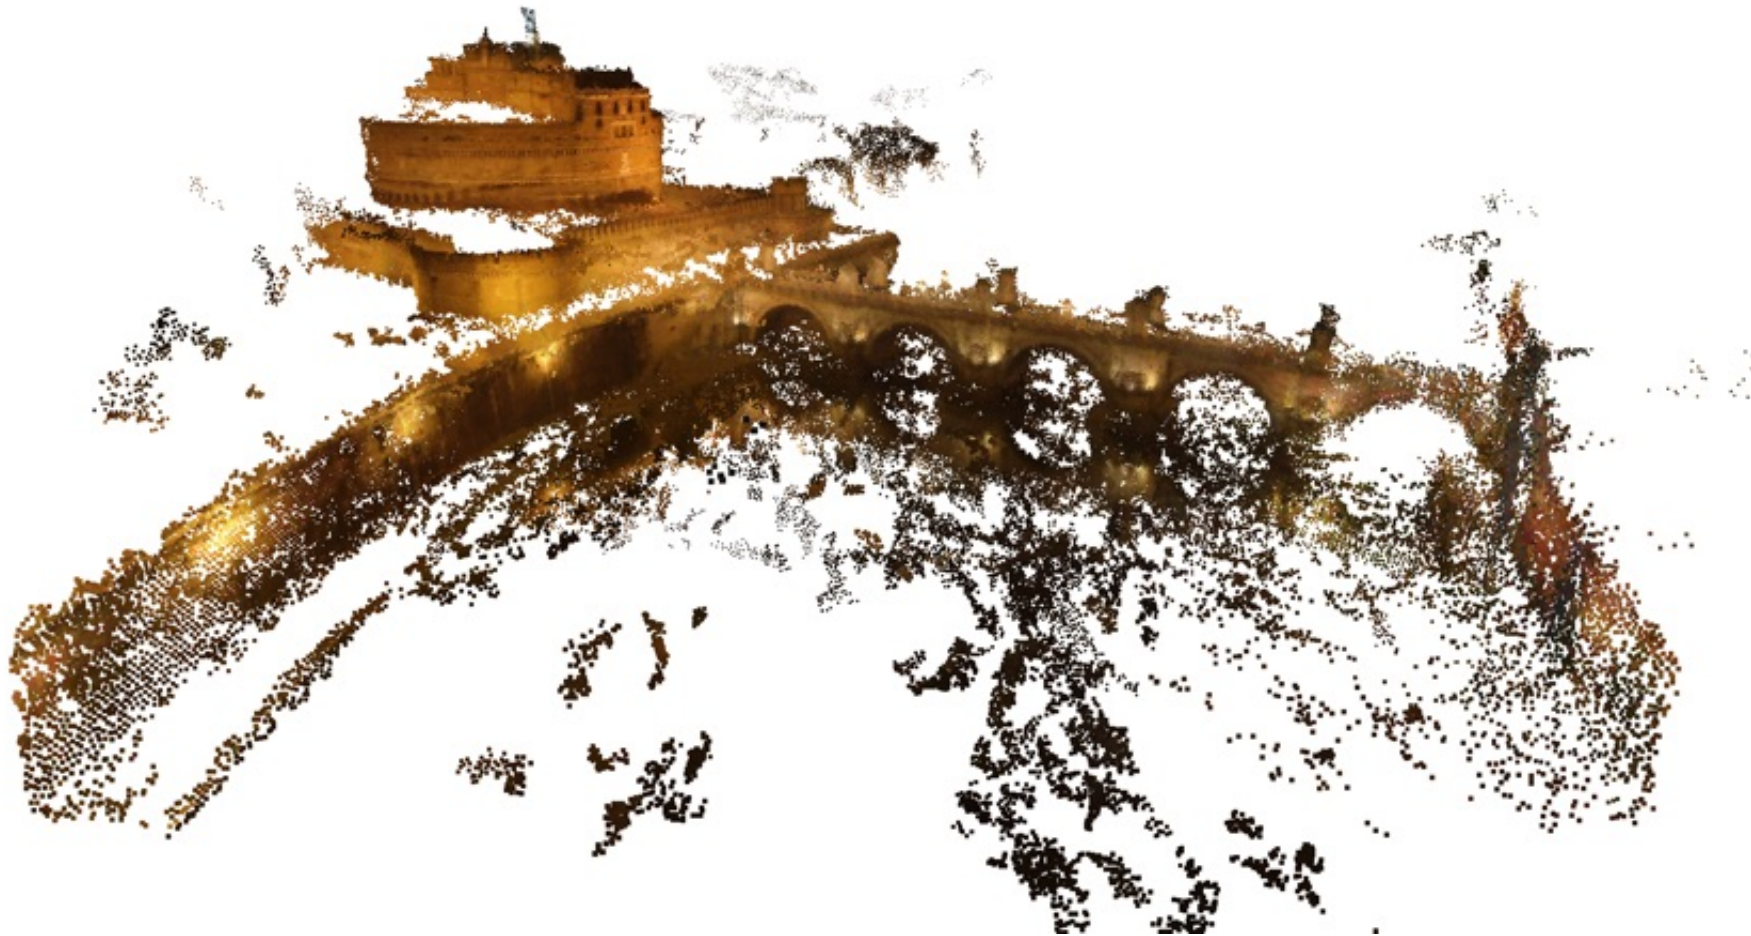

Repainted+Inpainted+Blended

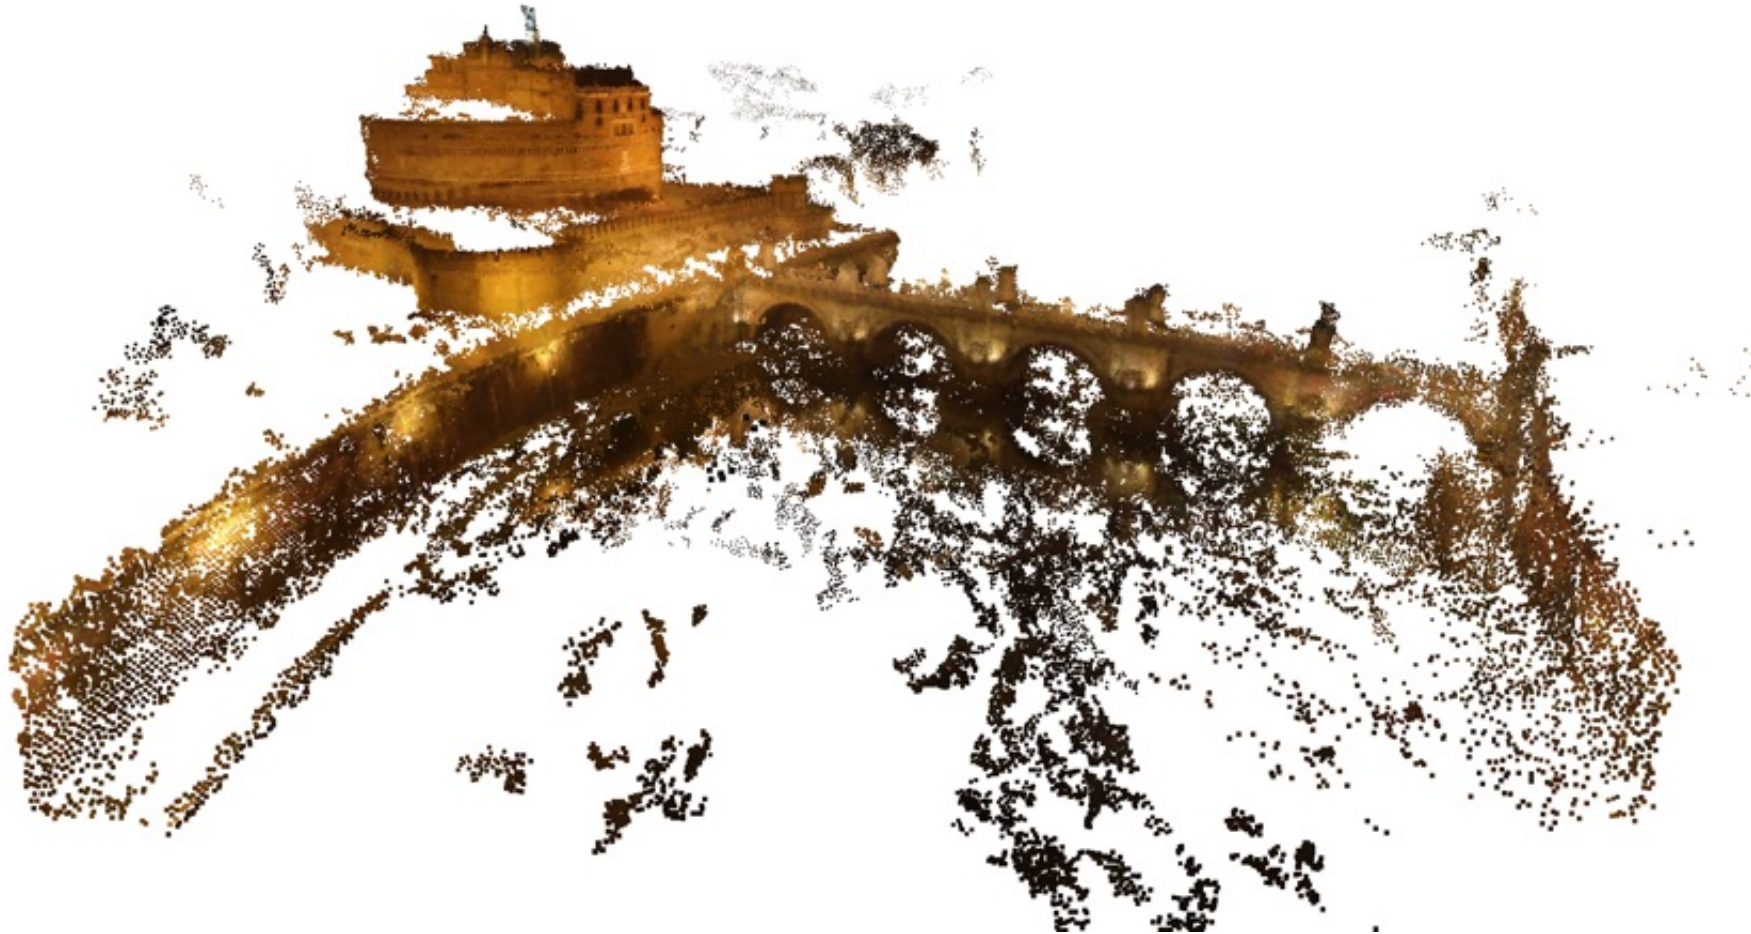

Radcliffe Camera, Oxford

Day-only

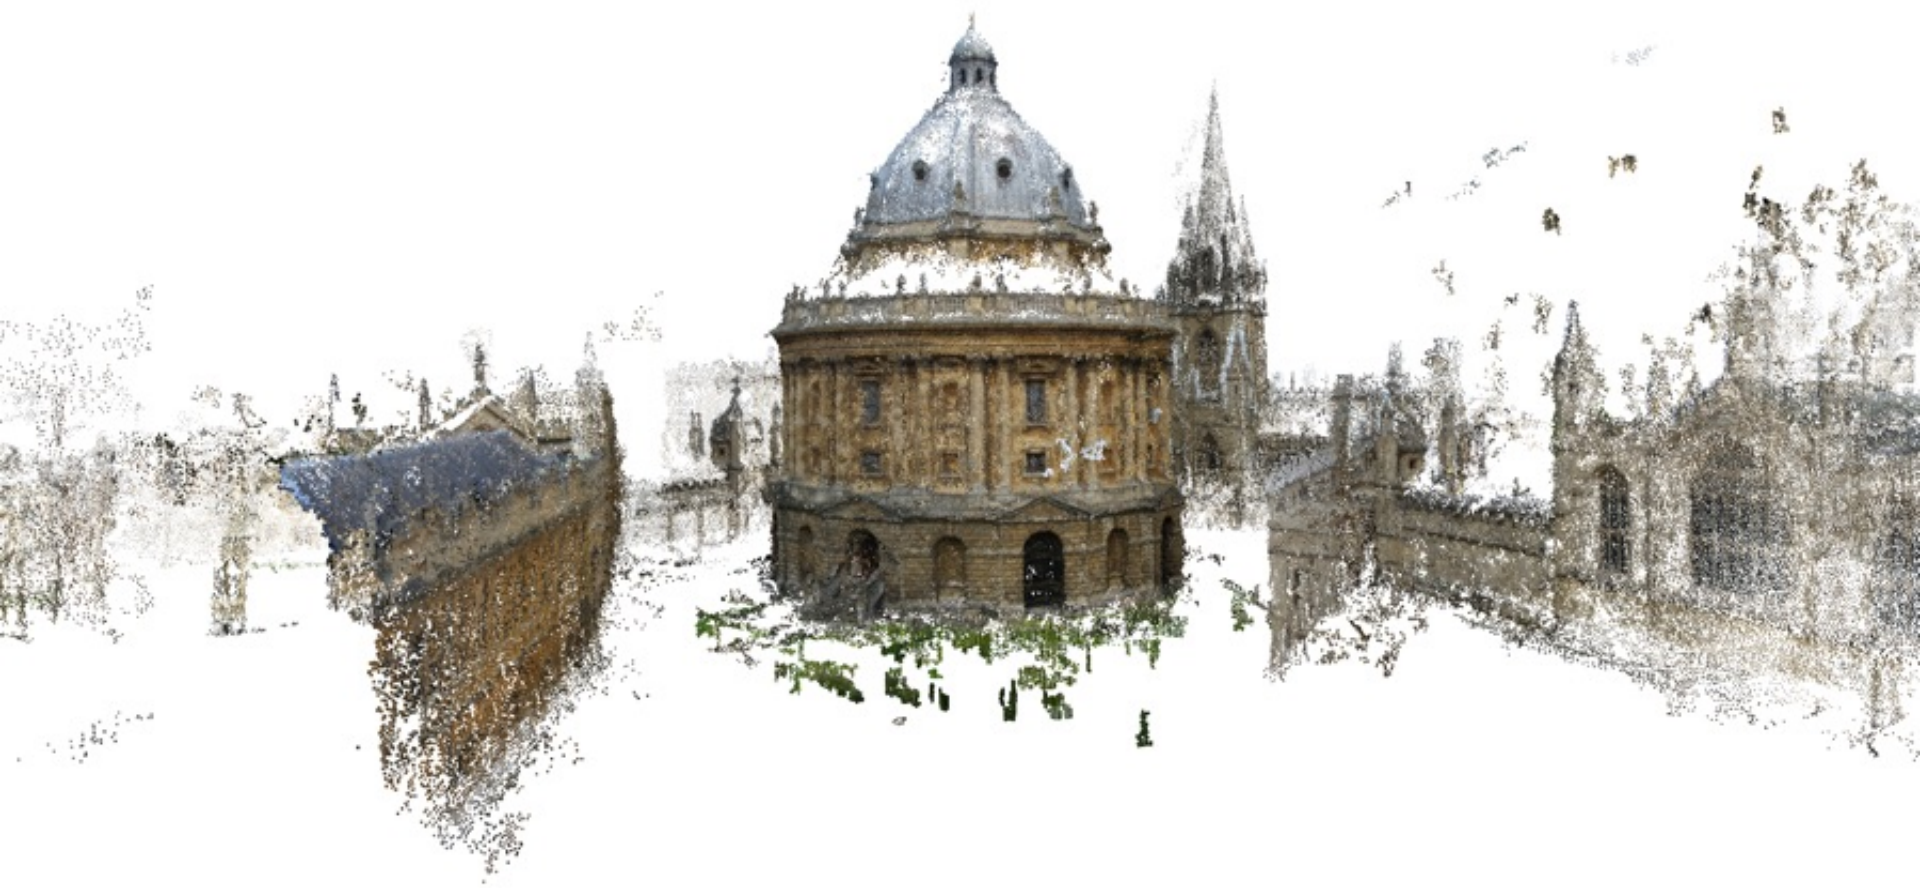

Night-only

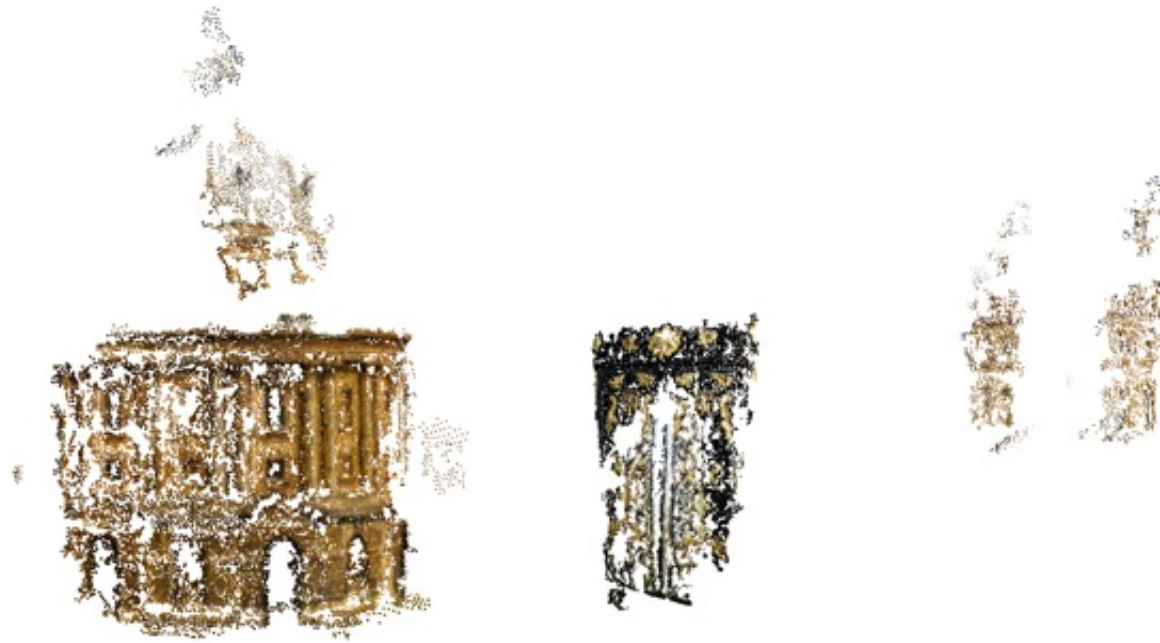

Repainted

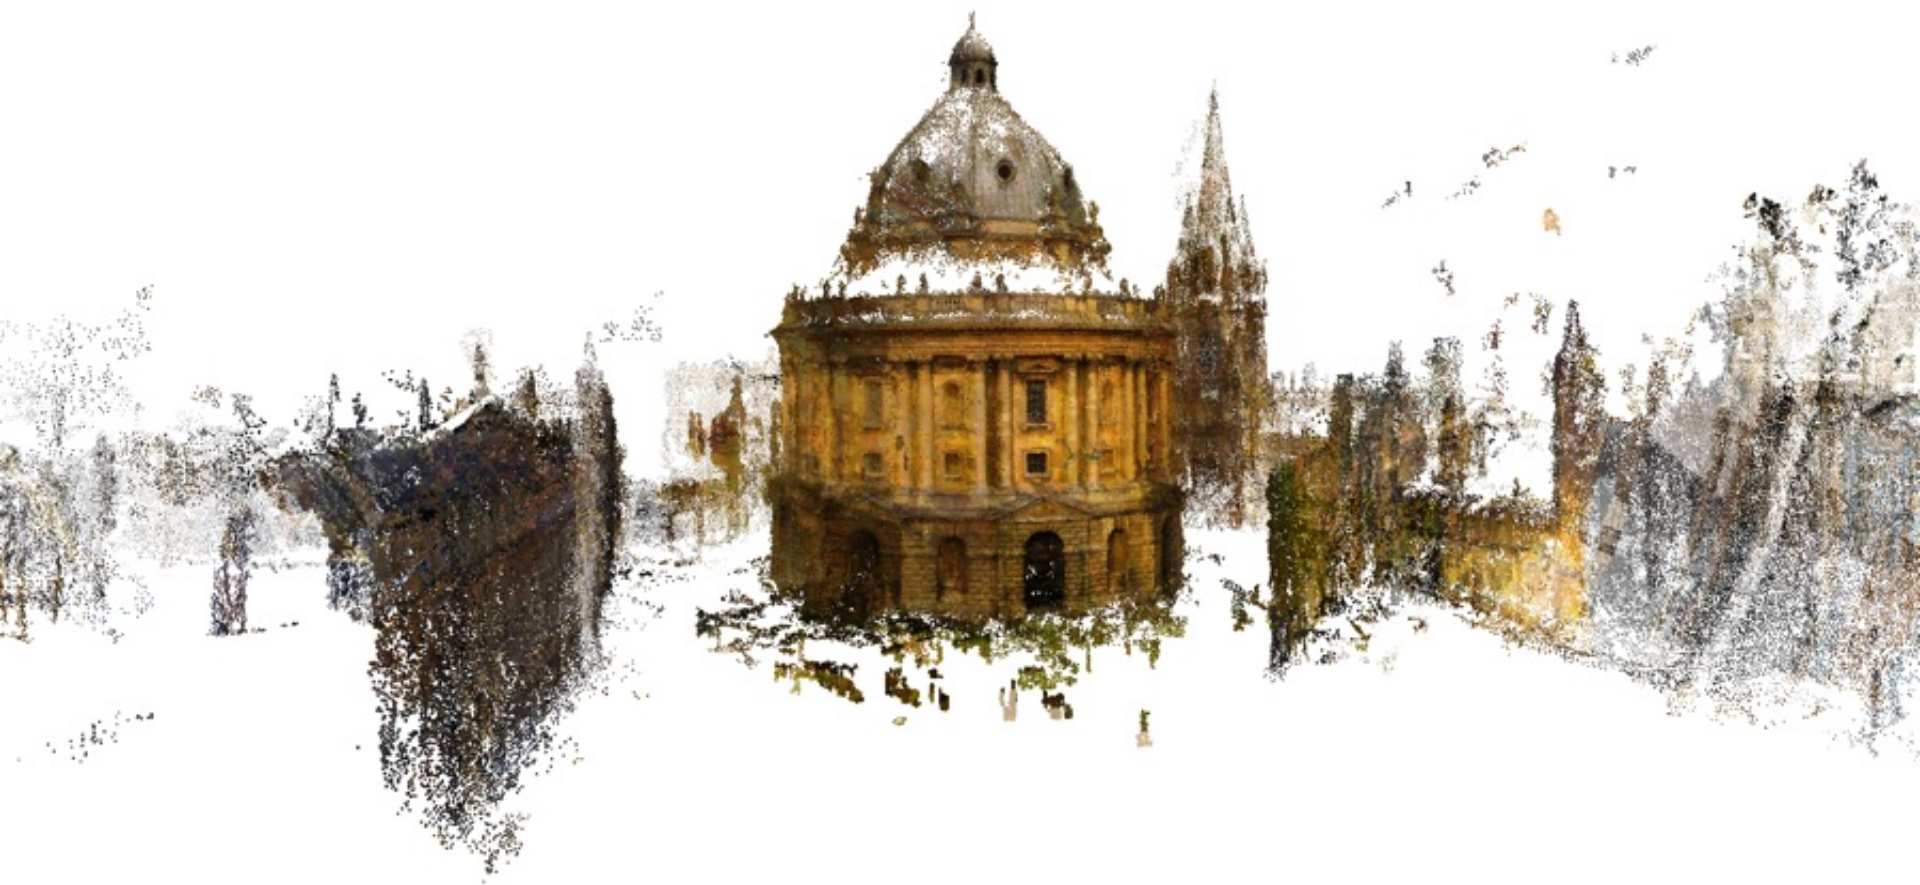

Repainted+Inpainted+Blended

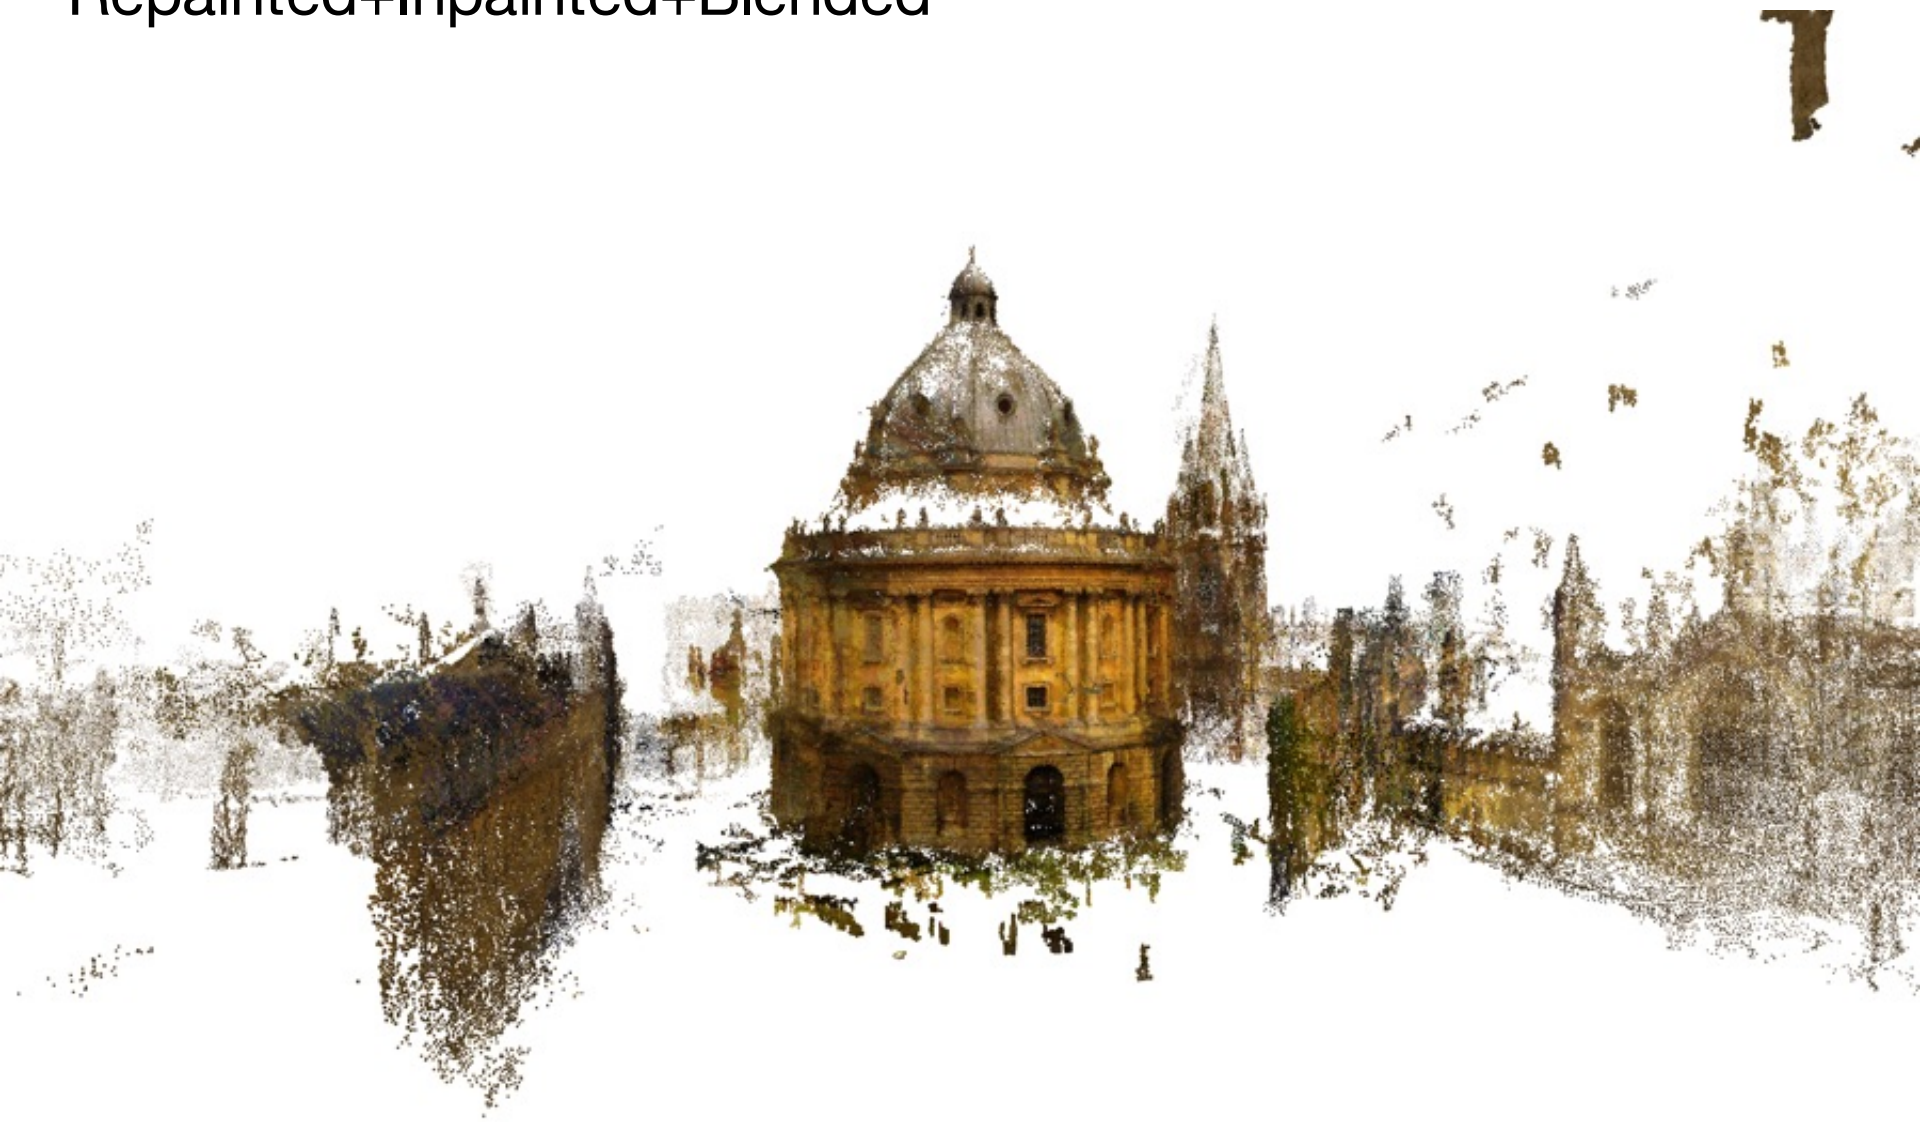

# Palais des Papes, Avignon

Day-only

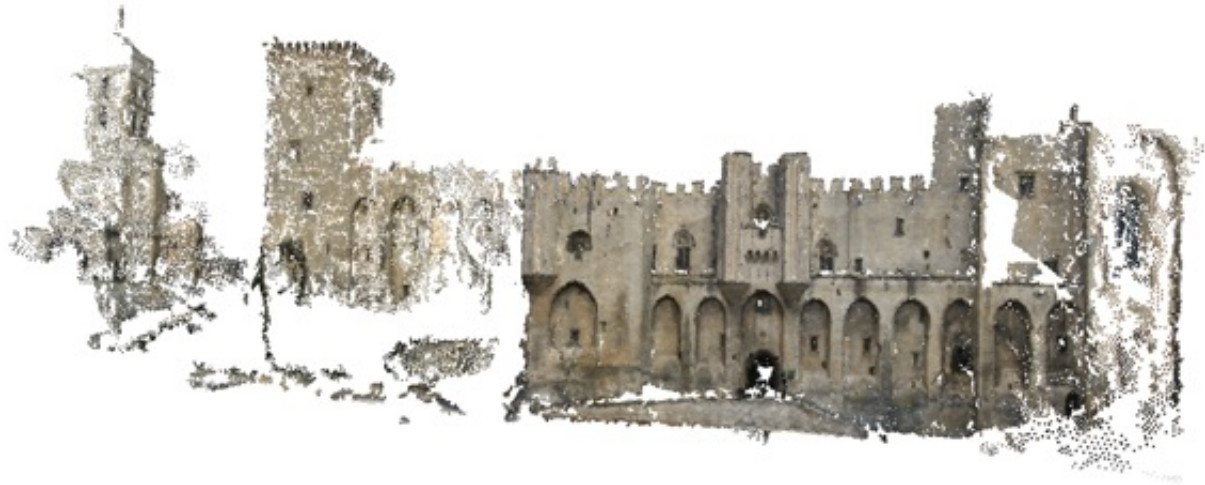

Night-only

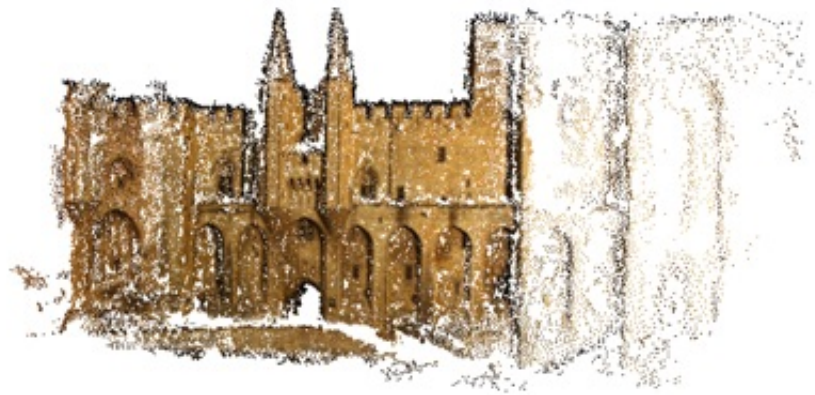

Repainted

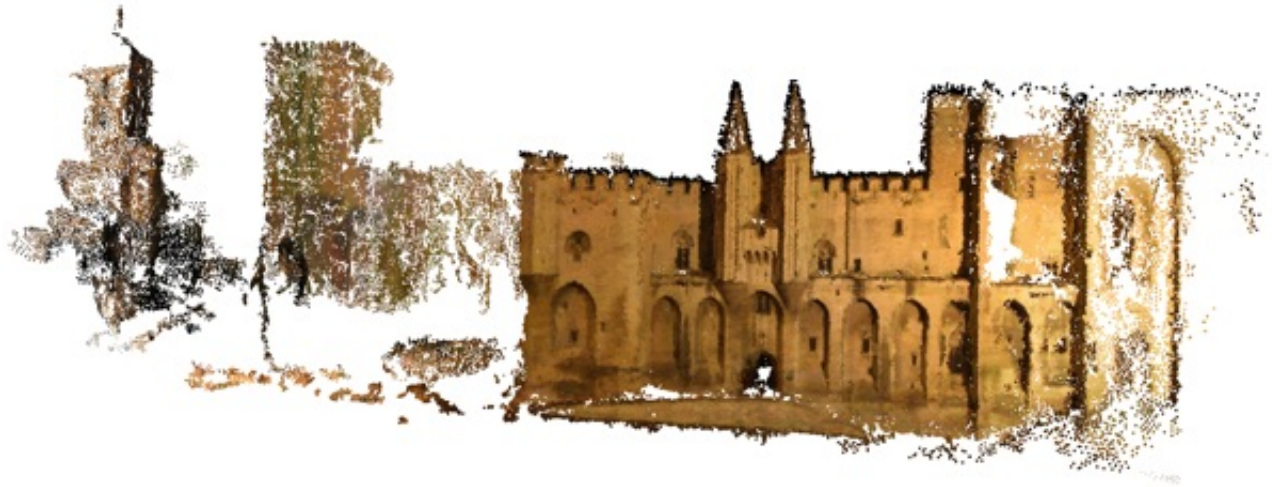

Repainted+Inpainted+Blended

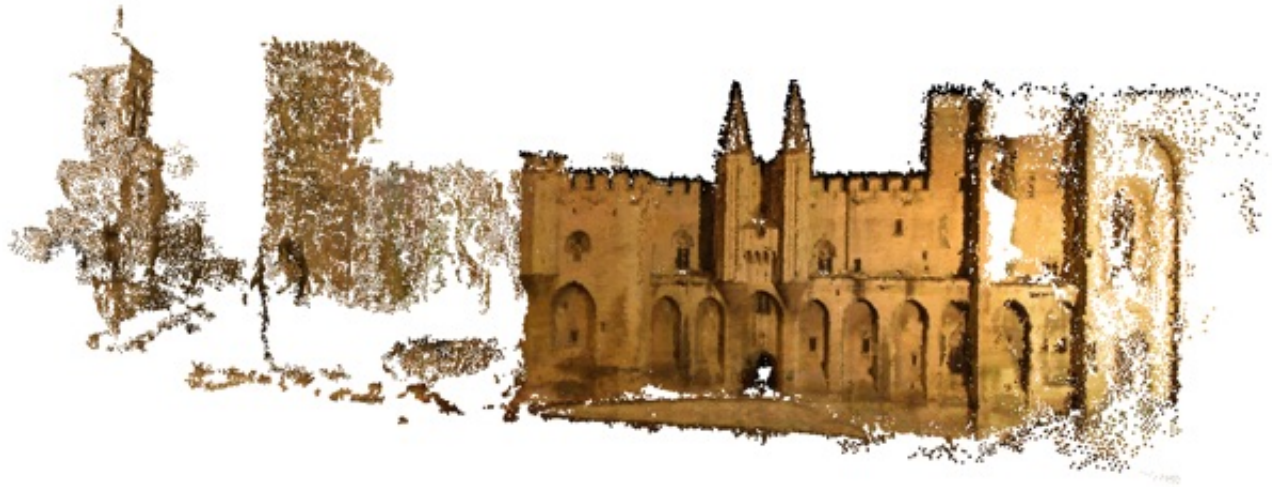

# Spanish Steps, Rome

Day-only

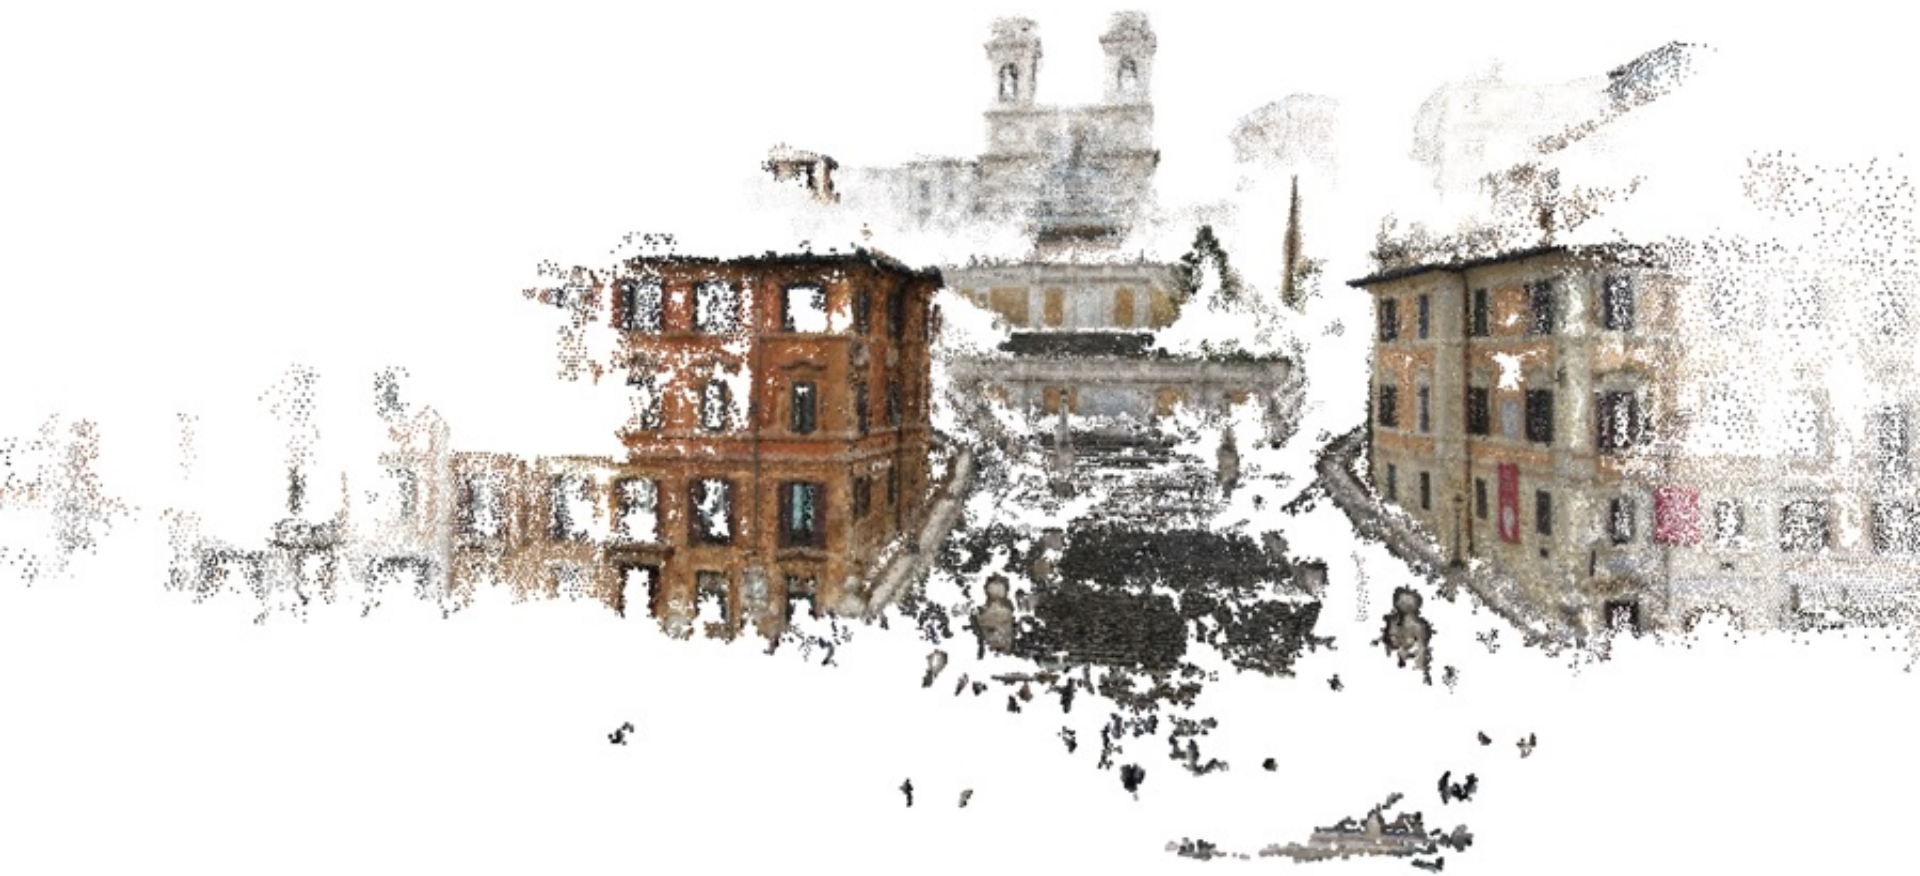

Night-only

No model. Too few night images.

Repainted

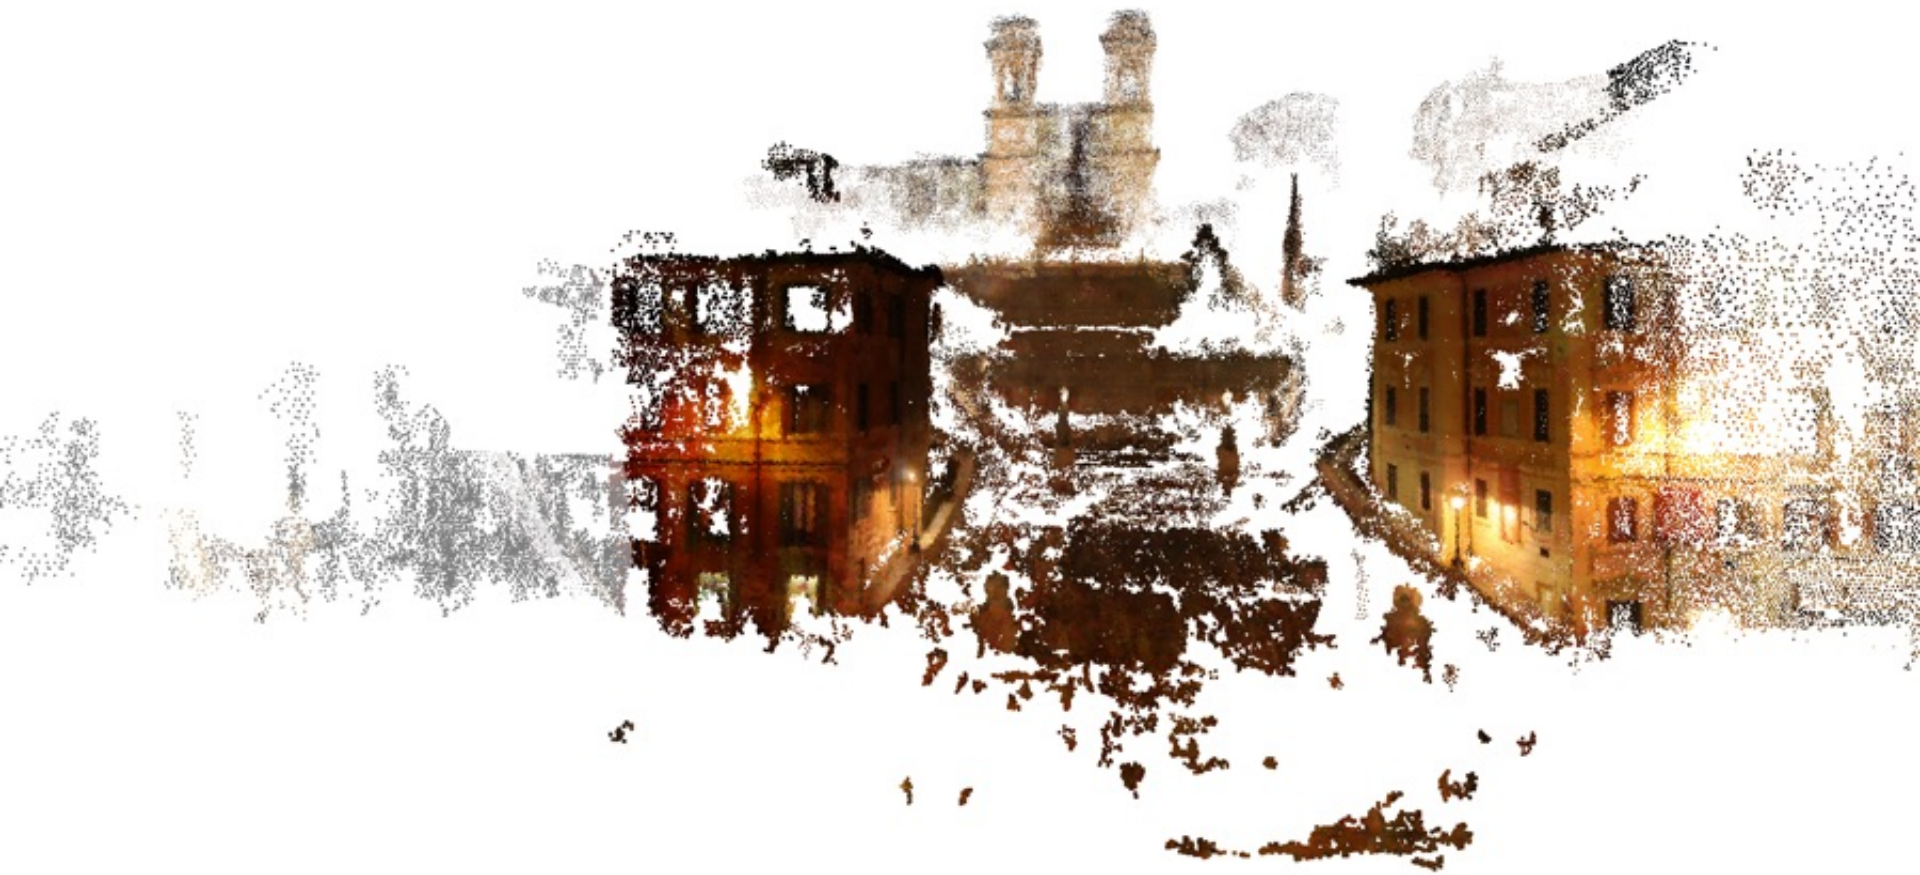

# Repainted+Inpainted+Blended

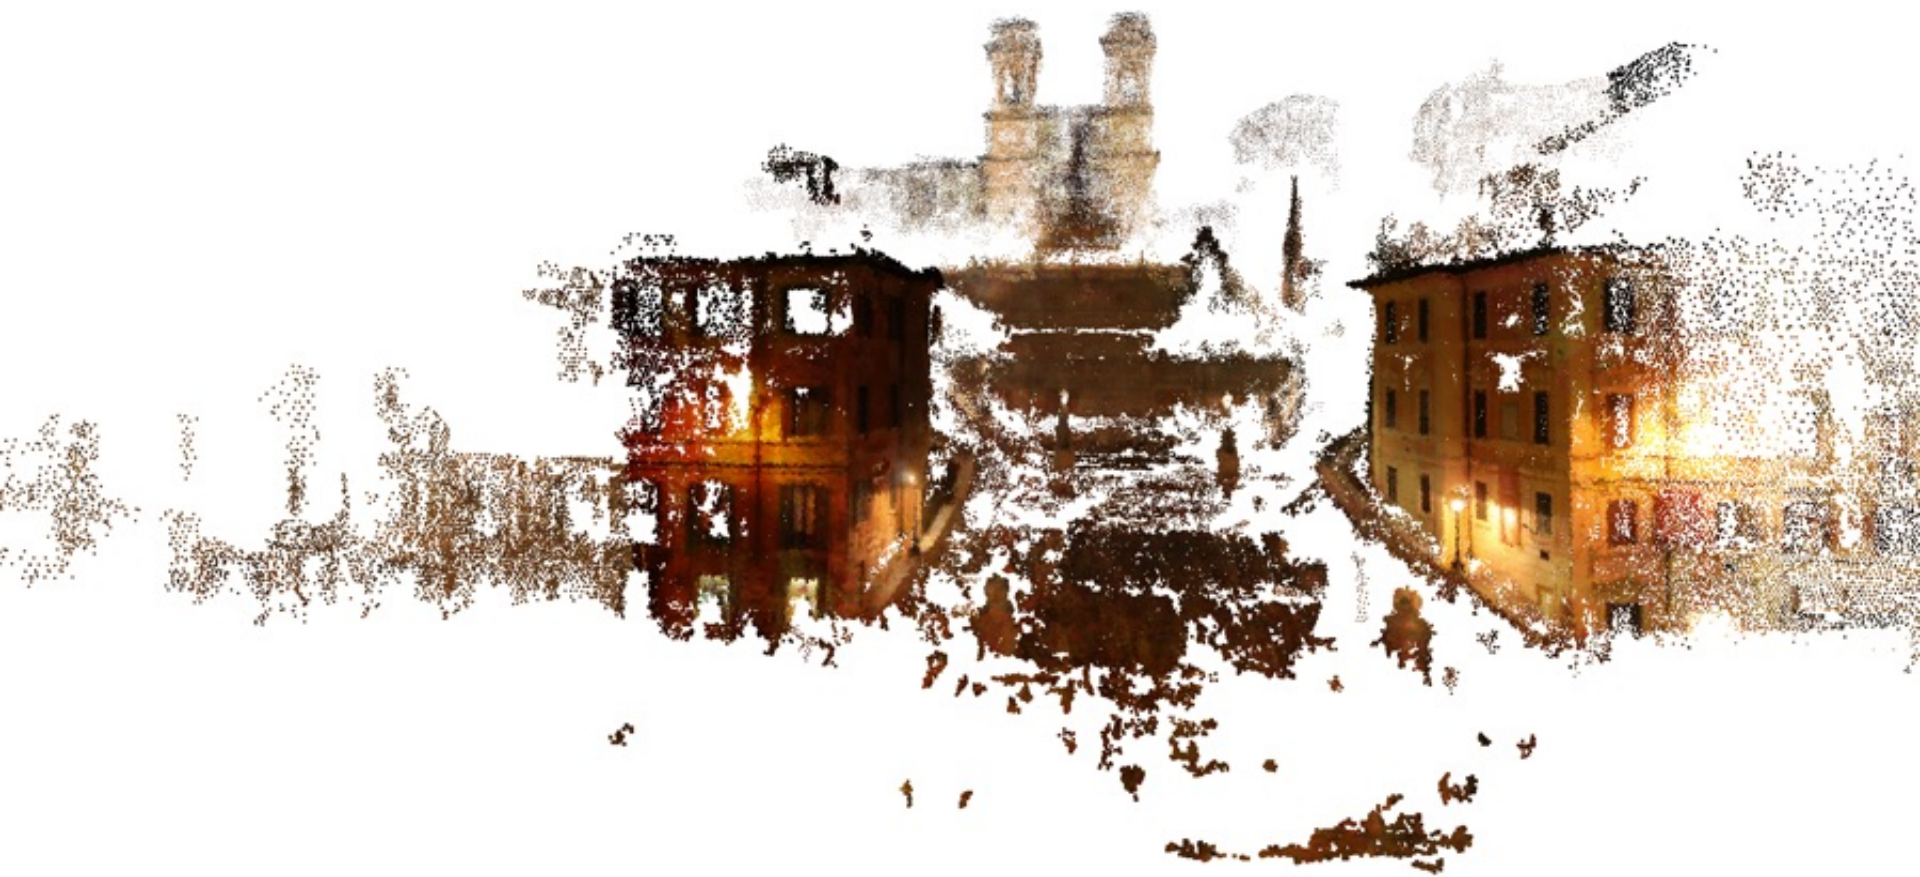

Sacre Coeur, Paris

Day-only

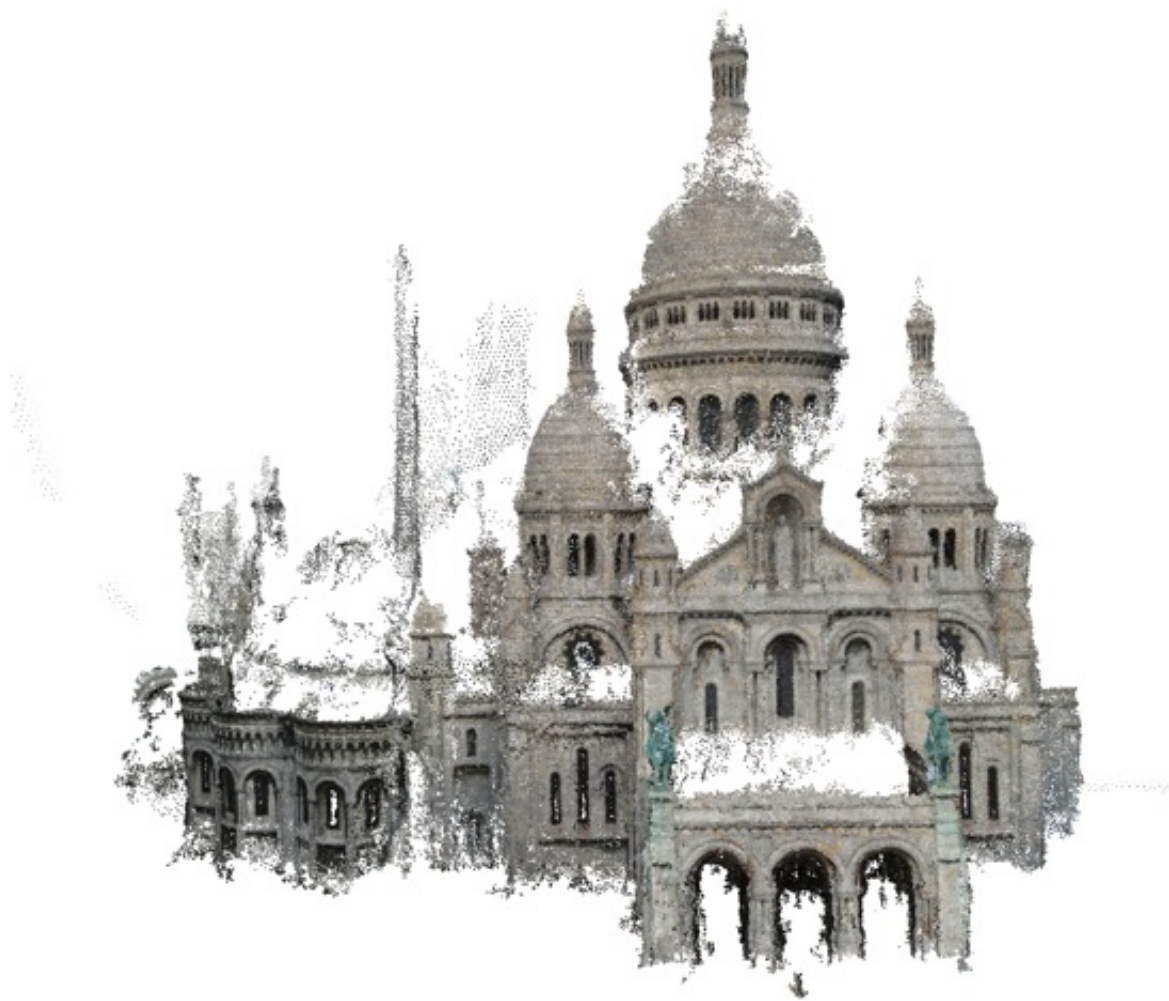

Night-only

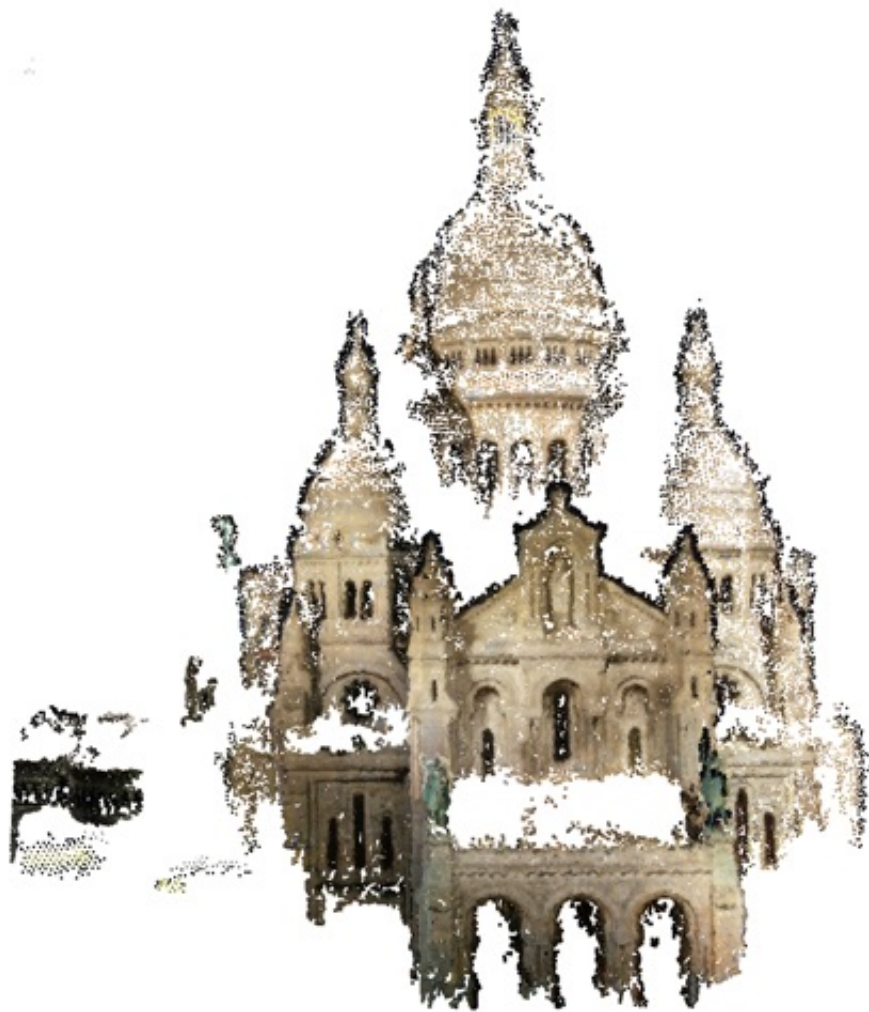

Repainted

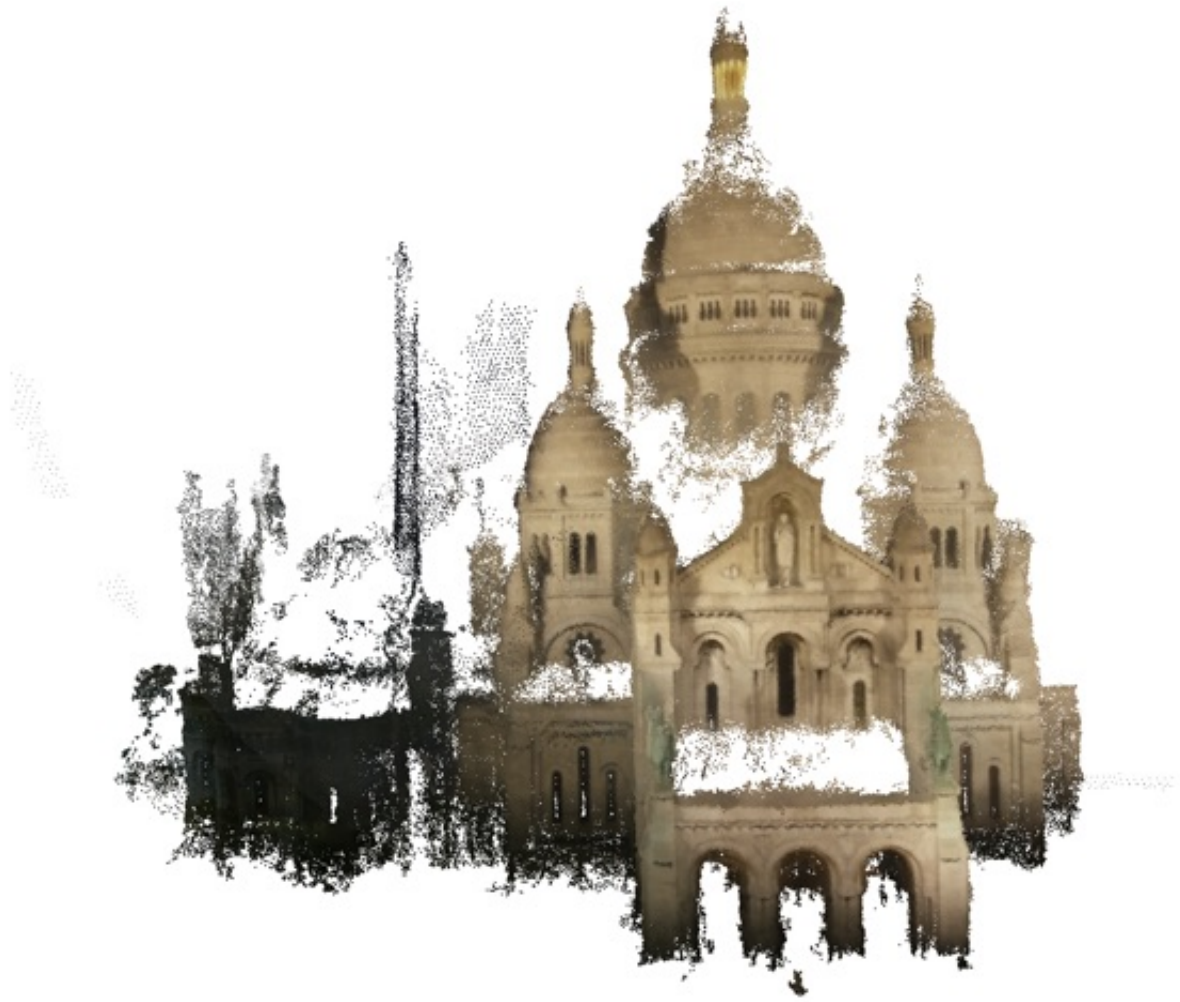

# Repainted+Inpainted+Blended

(All points visible in many night images, hence same as Inpainted)

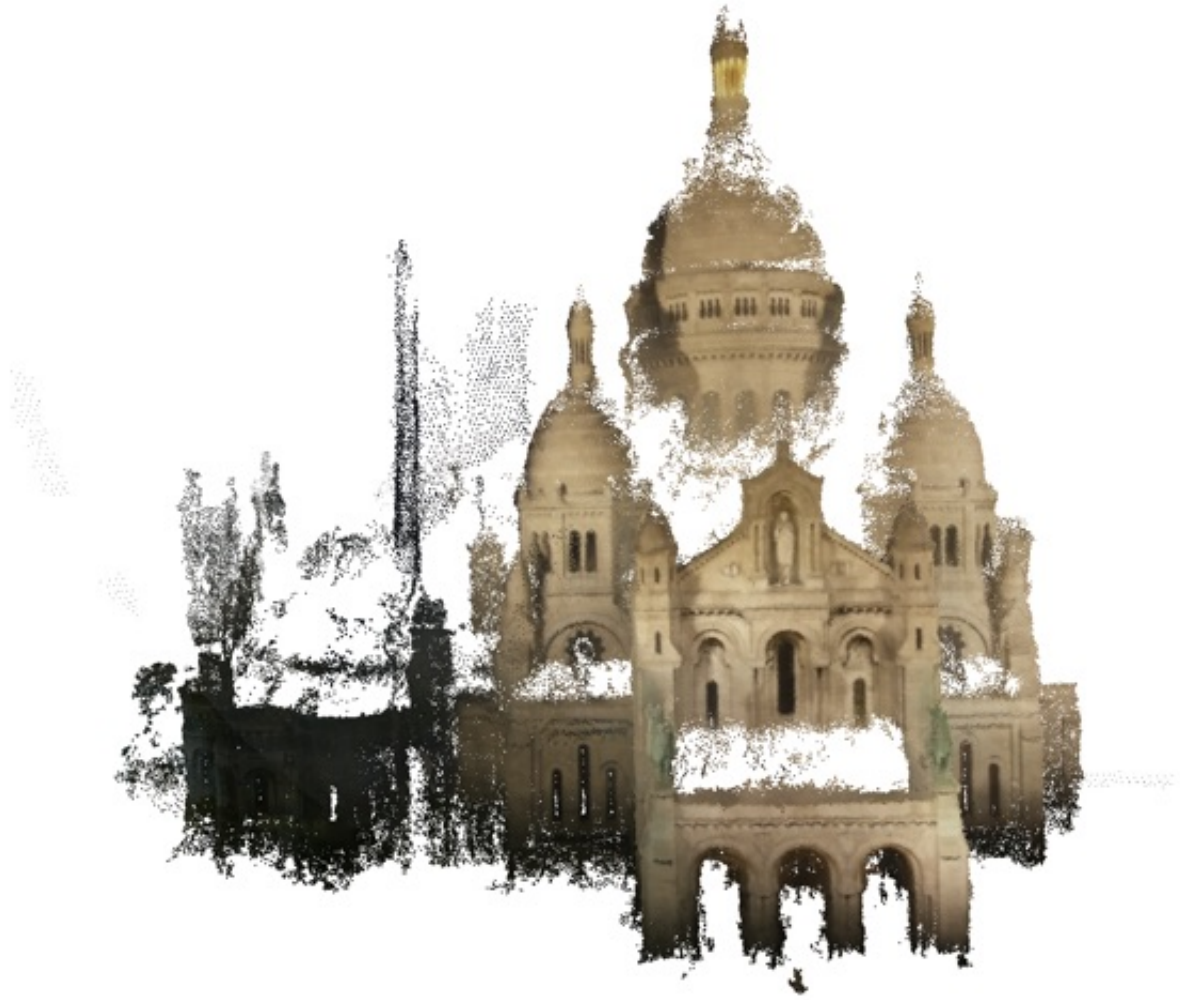

Notre Dame, Paris

Day-only

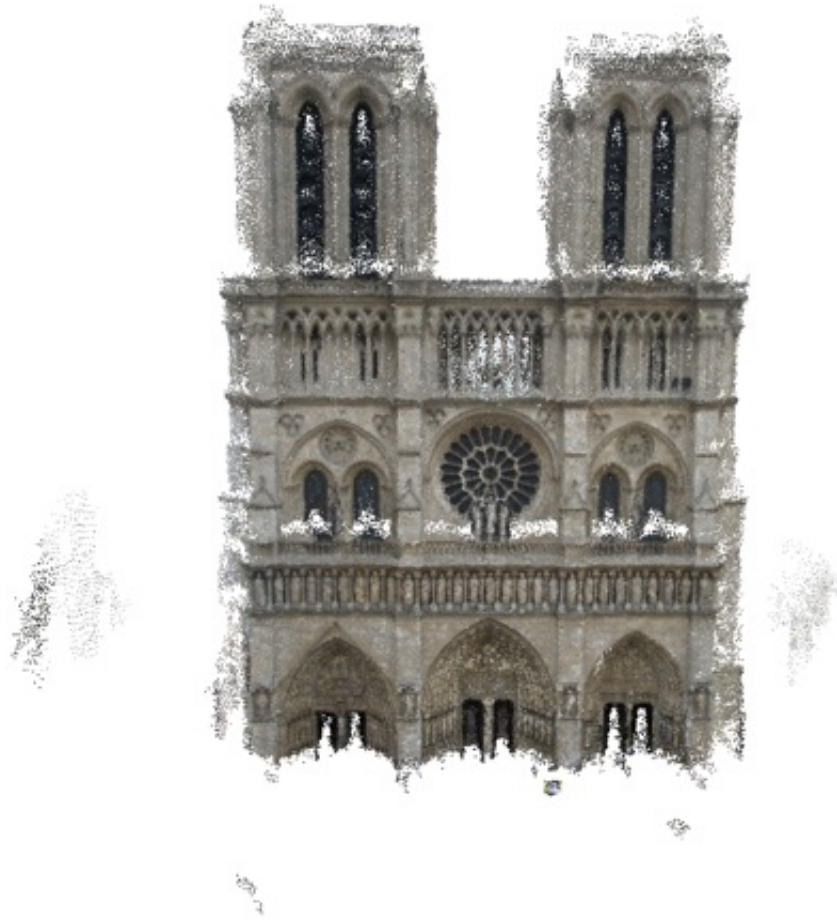

Night-only

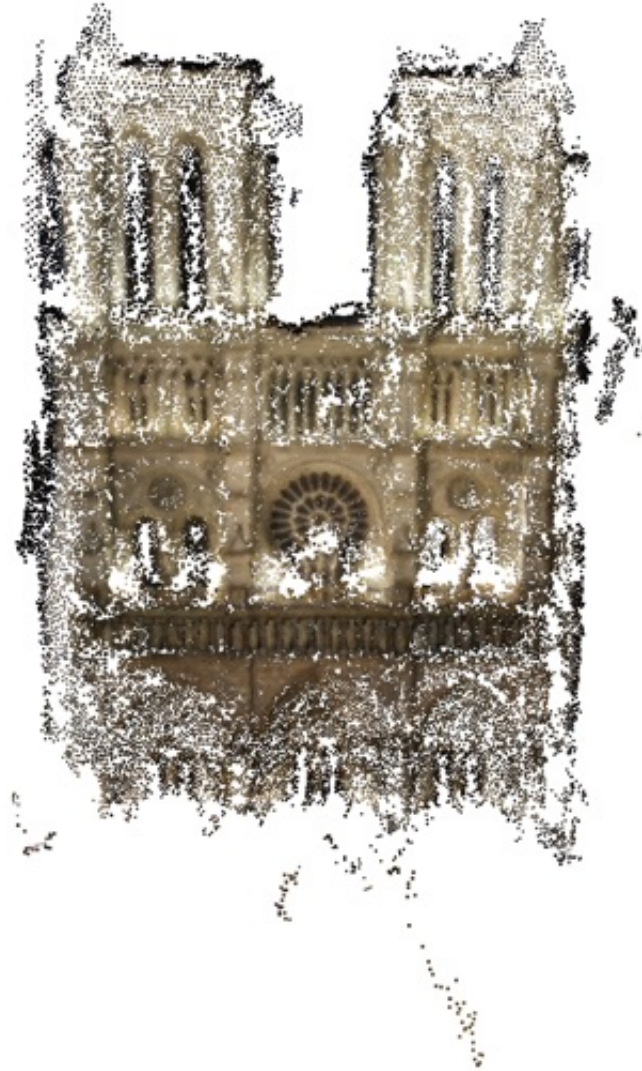

Repainted

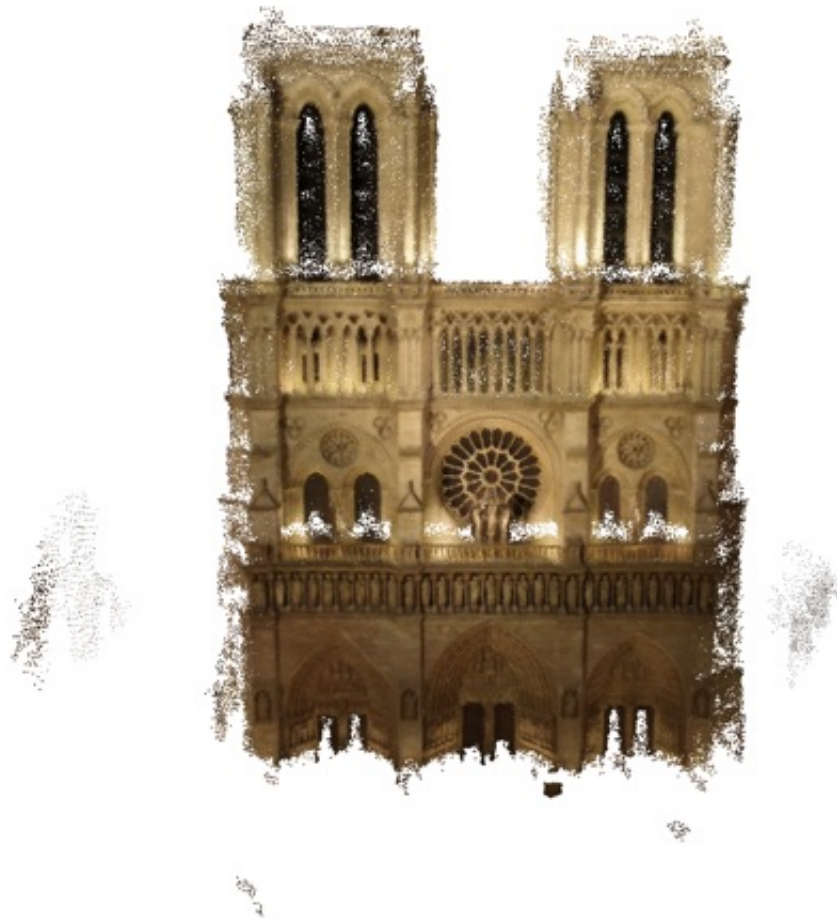

# Repainted+Inpainted+Blended

(All points visible in many night images, hence same as Inpainted)

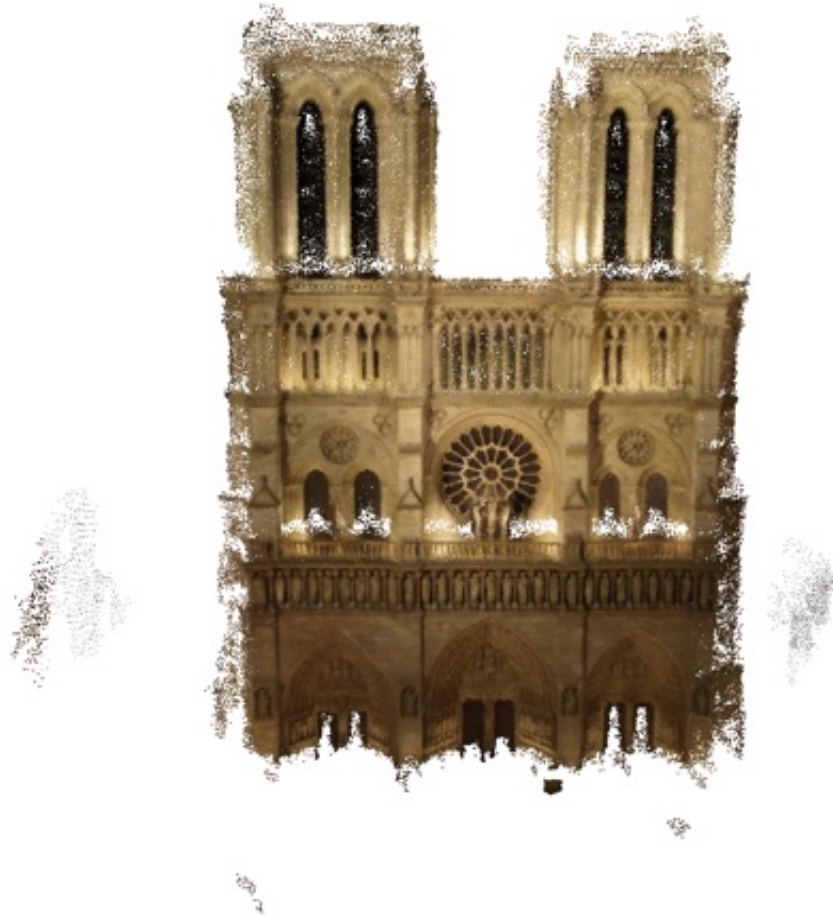

Colosseum, Rome

Day-only

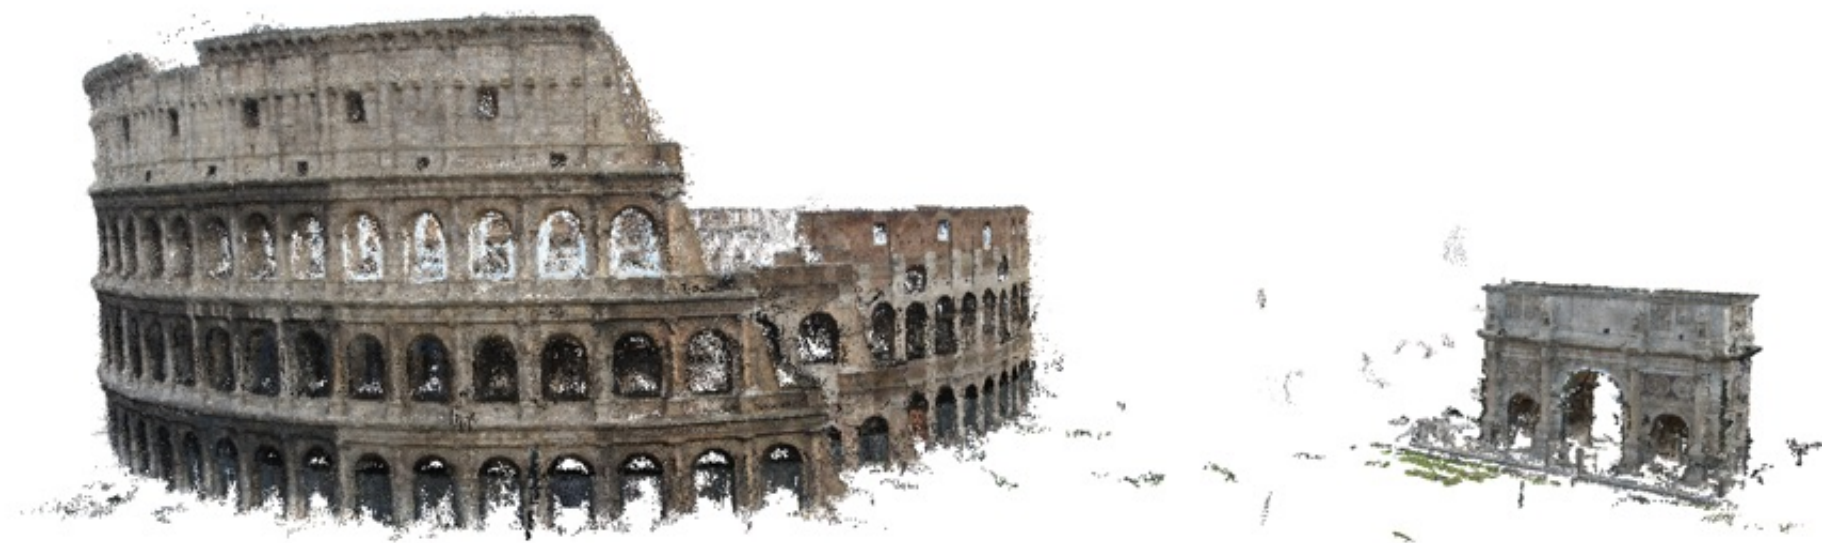

Night-only

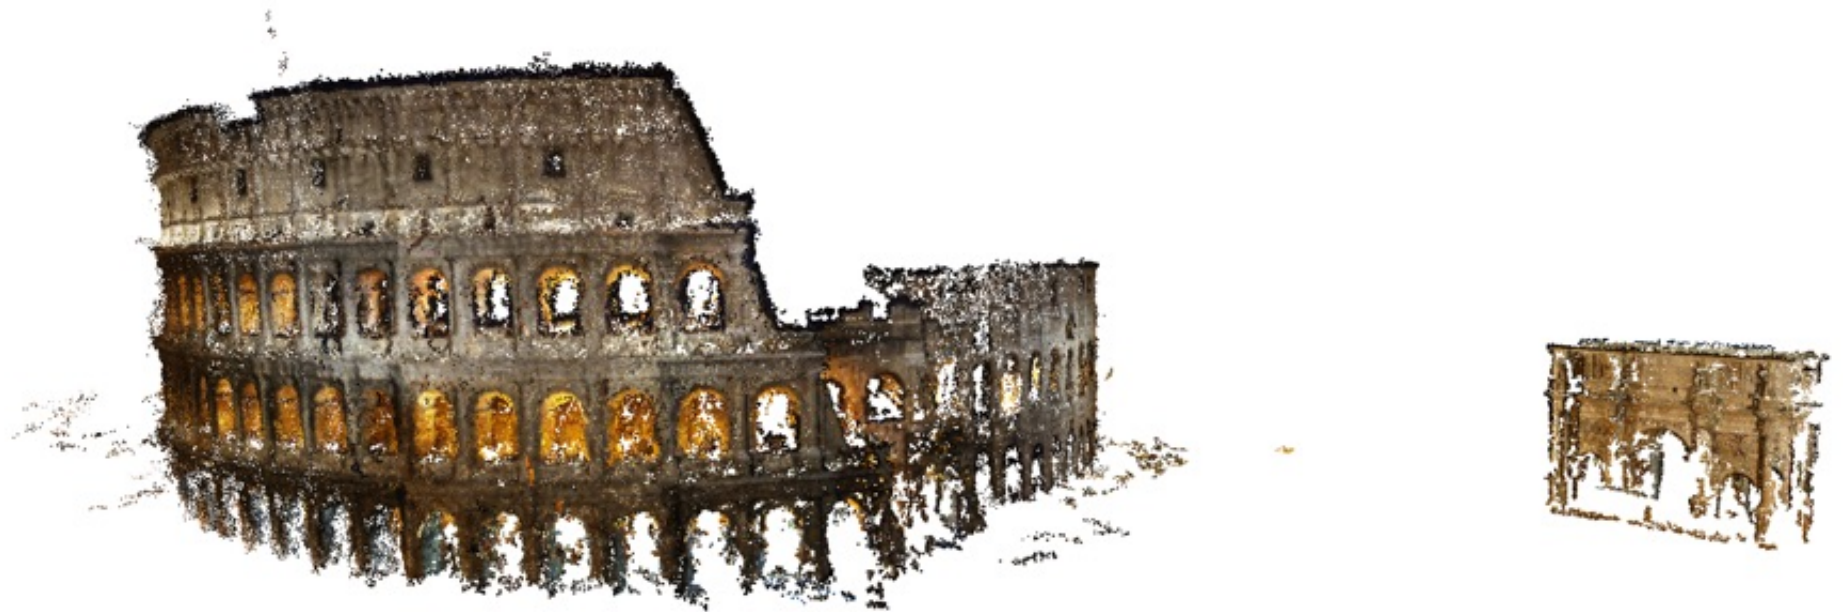

Repainted

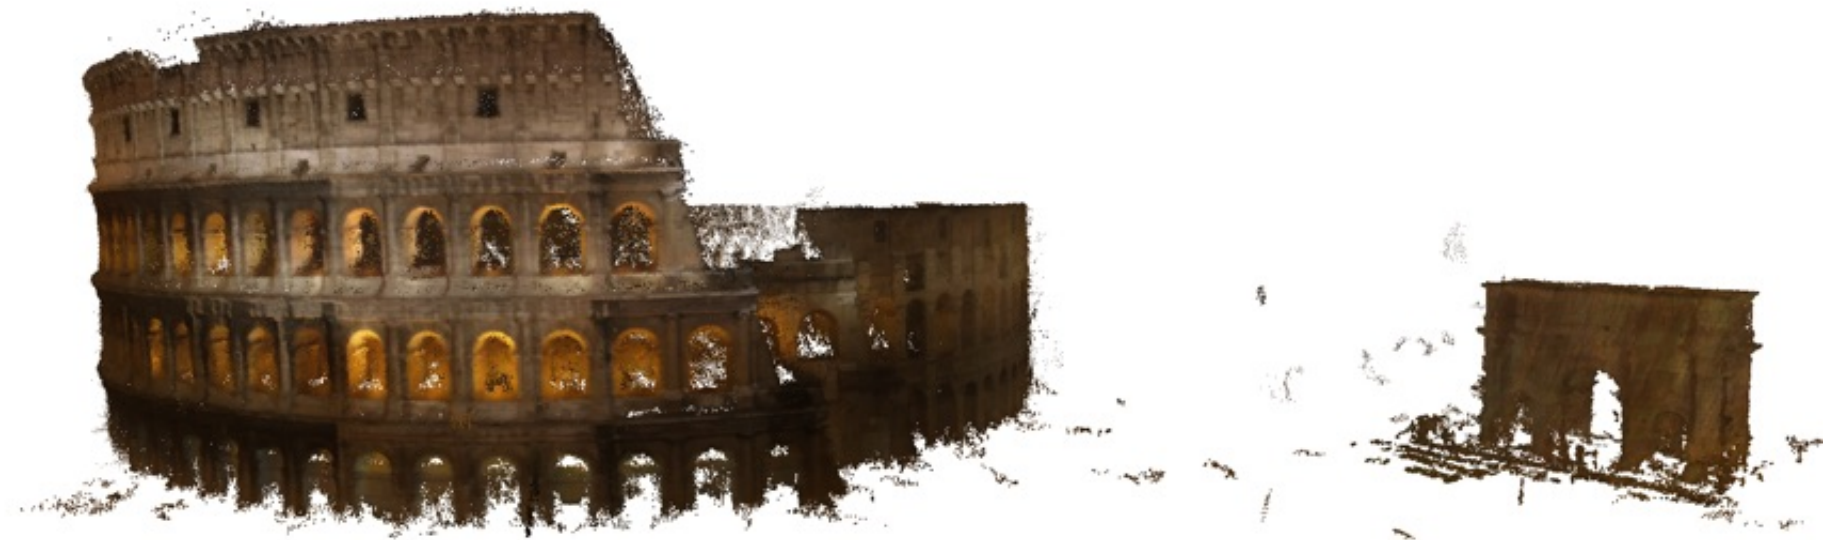

# Repainted+Inpainted+Blended

(All points visible in many night images, hence same as Inpainted)

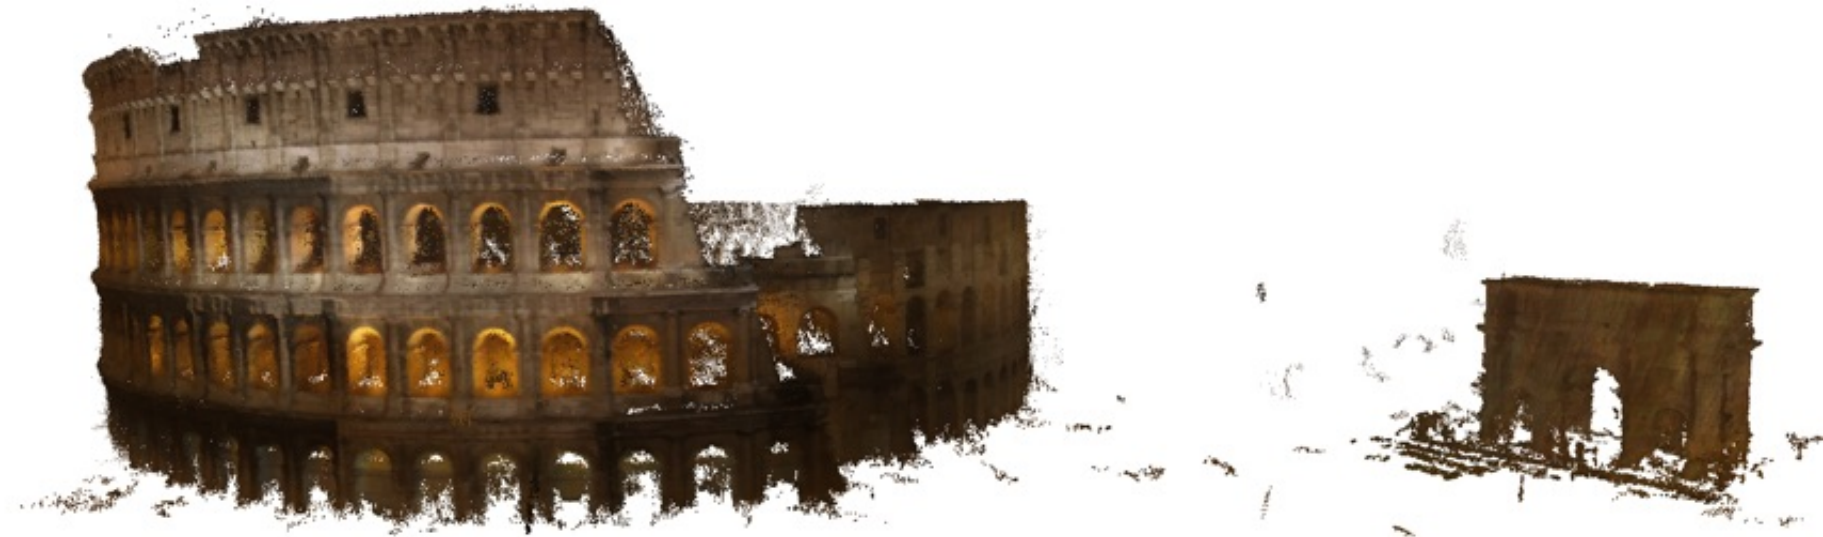

Old Town Square, Prague

Day-only

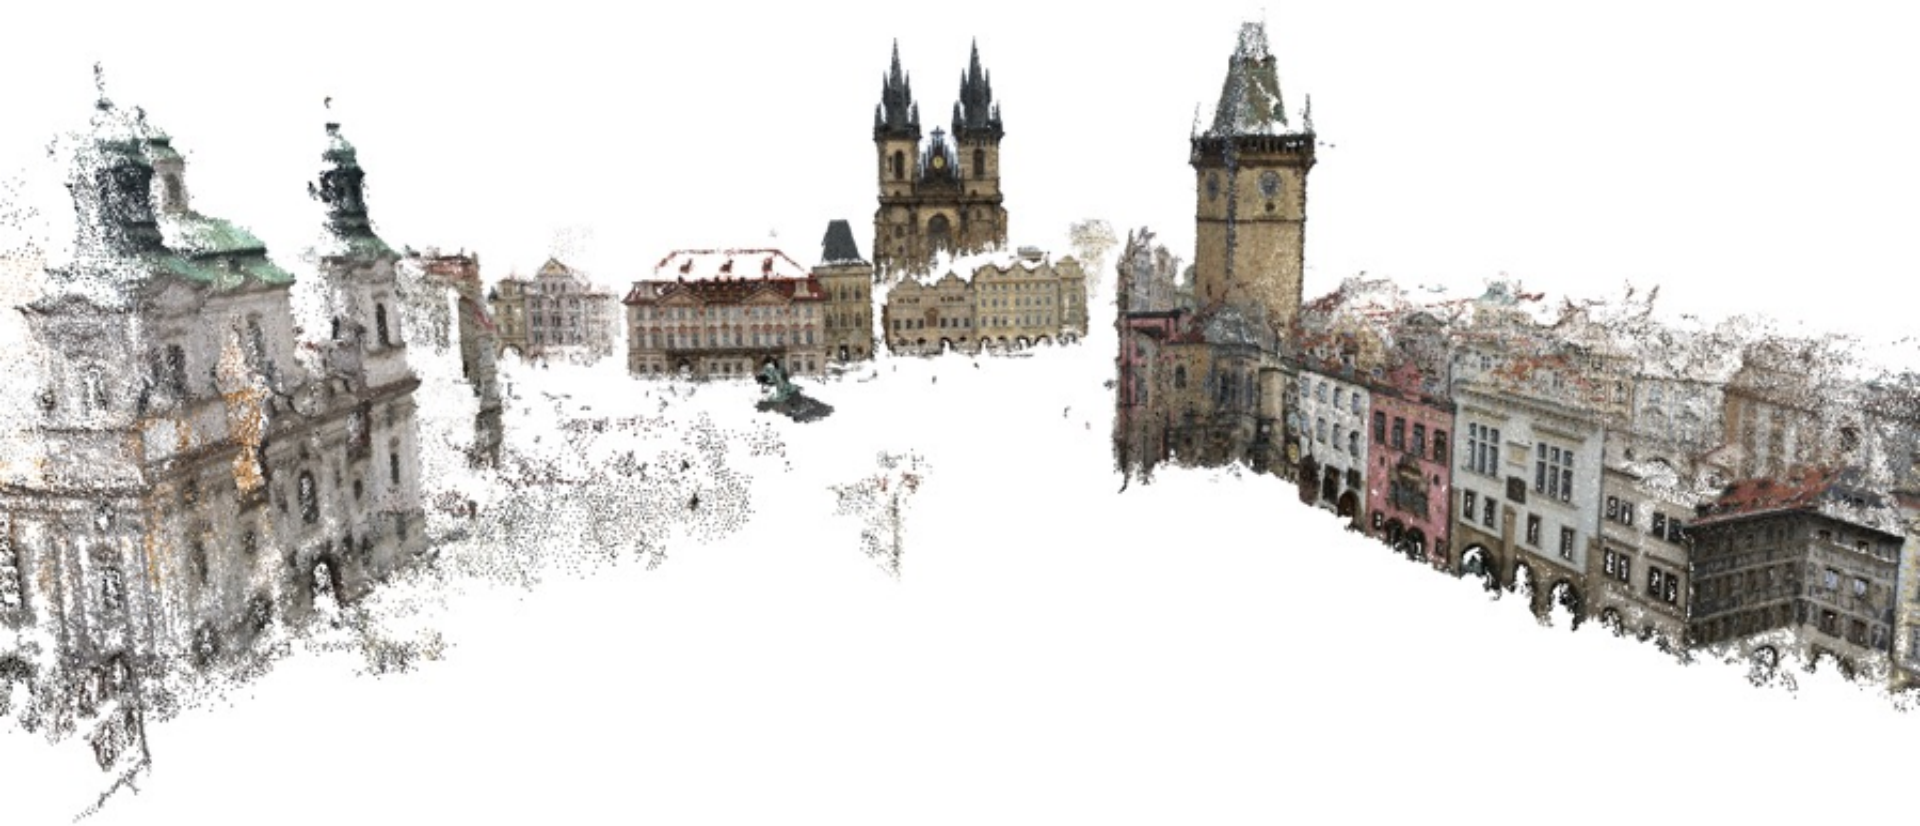

Night-only

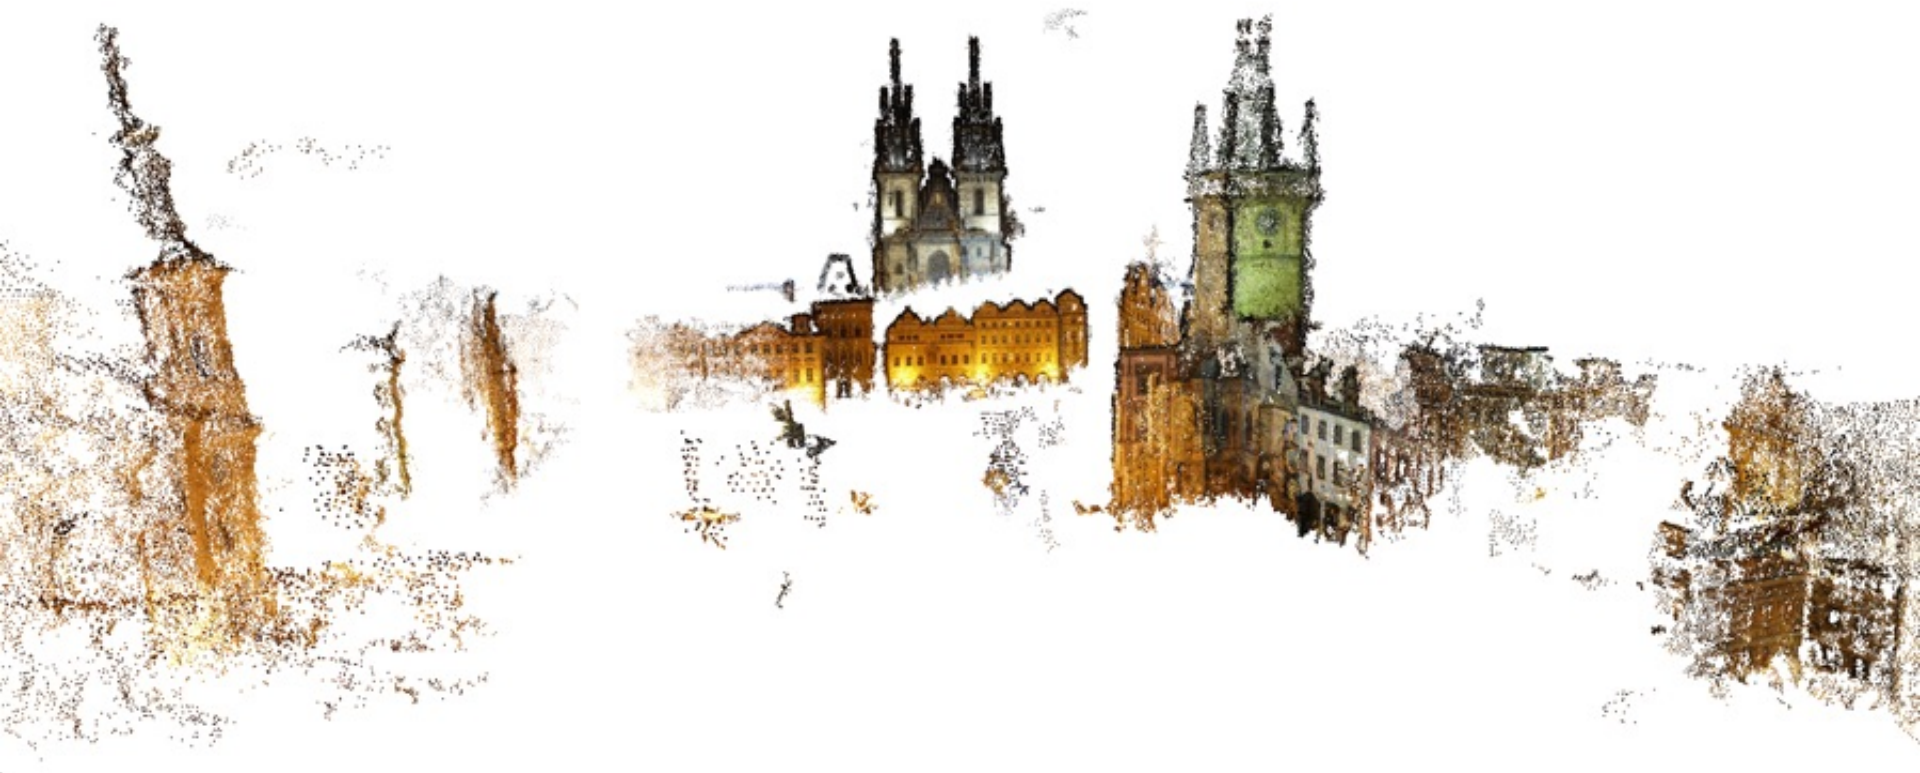

Repainted

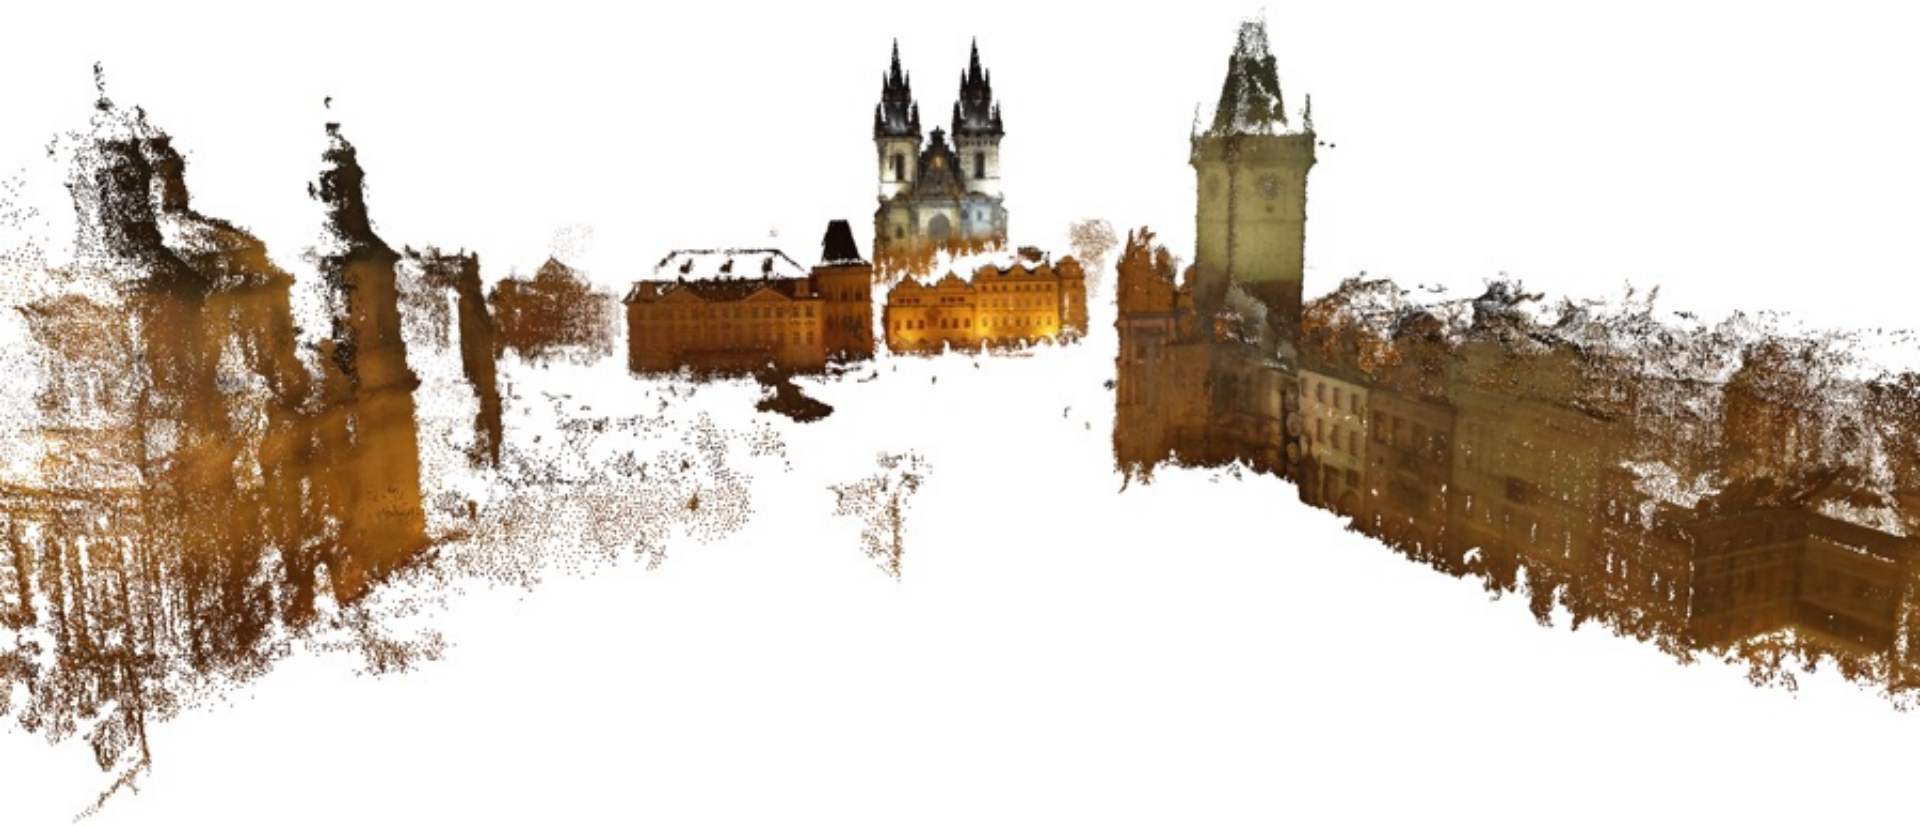

# Repainted+Inpainted+Blended

(All points visible in many night images, hence same as Inpainted)



St. Peter's Basilica, Vatican

Day-only

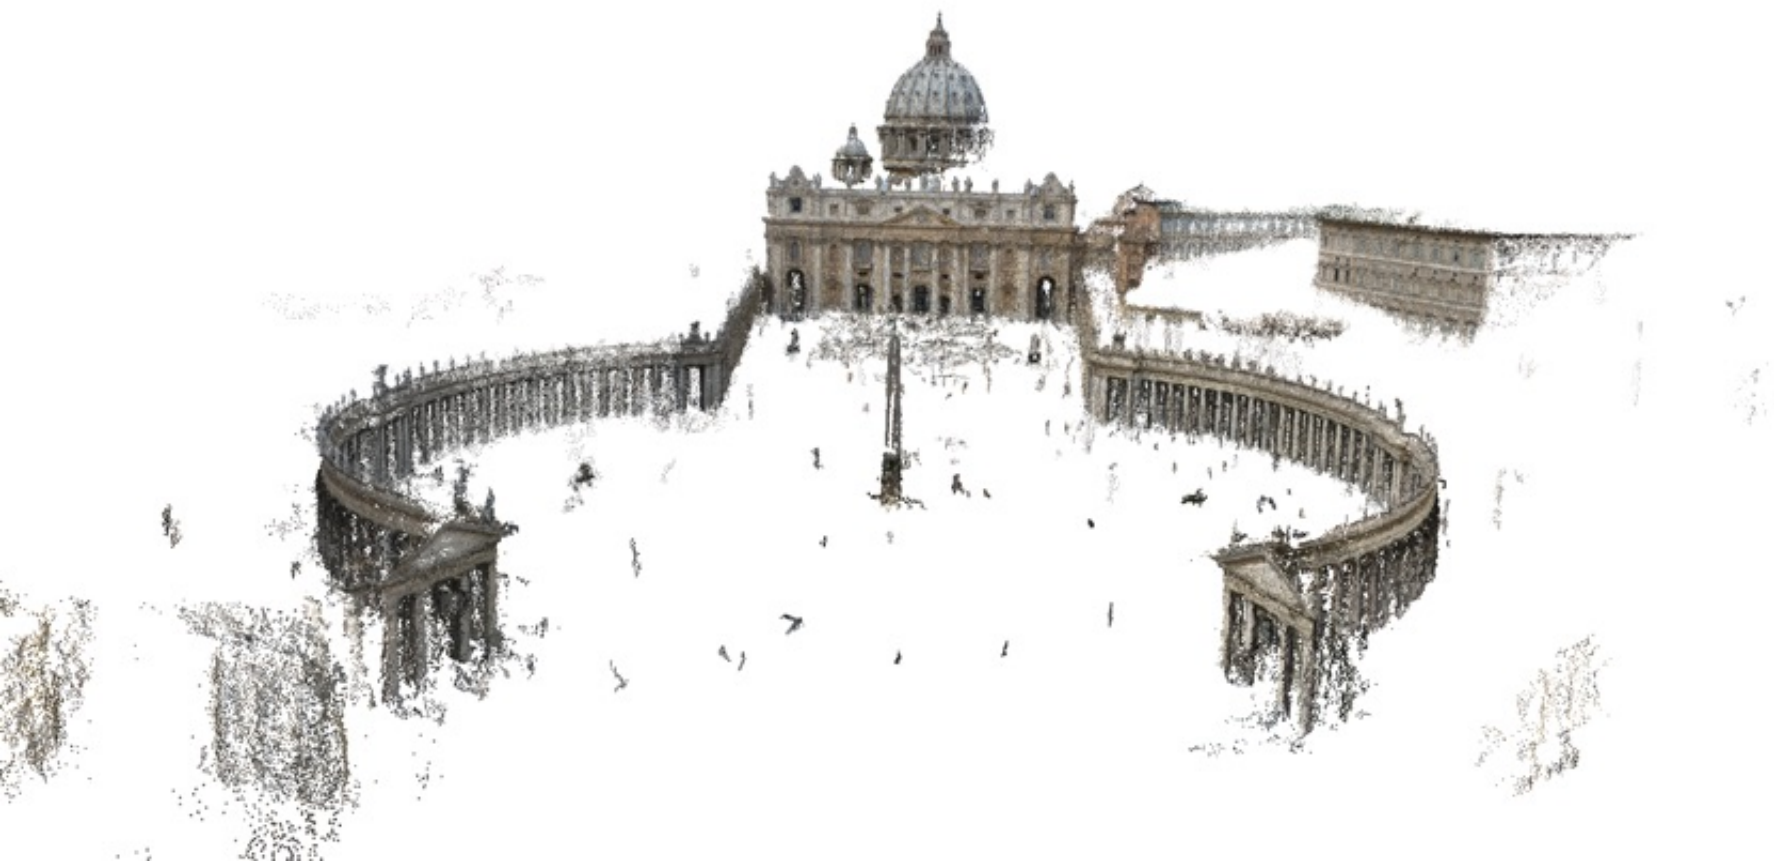

Night-only

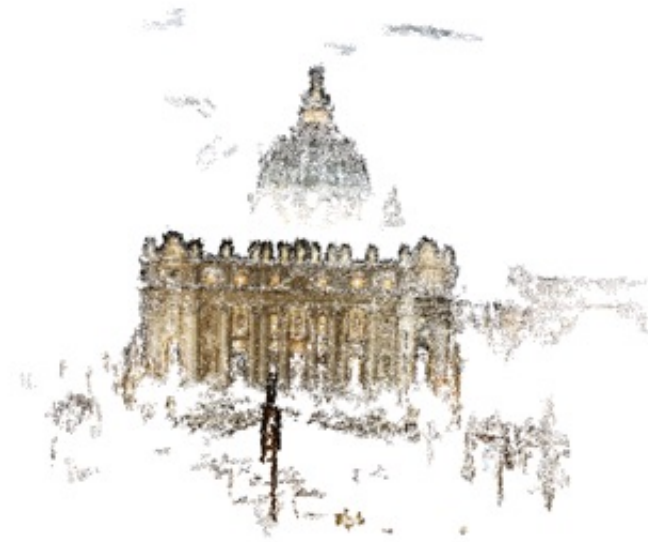

Repainted

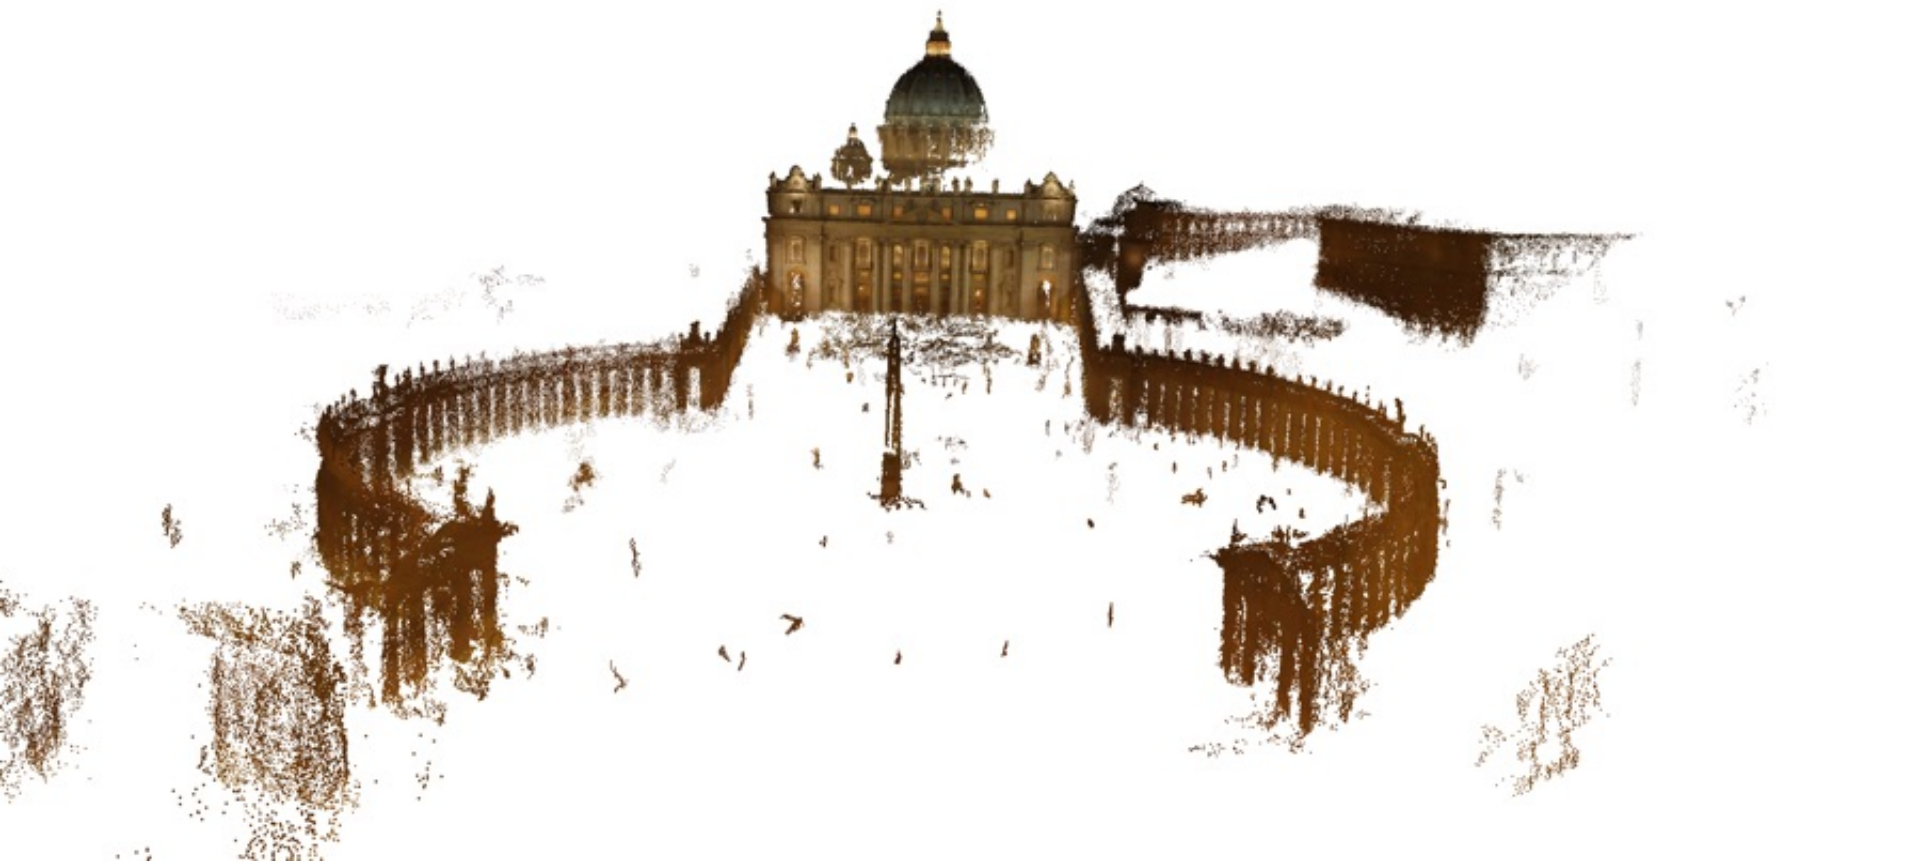

# Repainted+Inpainted+Blended

(All points visible in many night images, hence same as Inpainted)

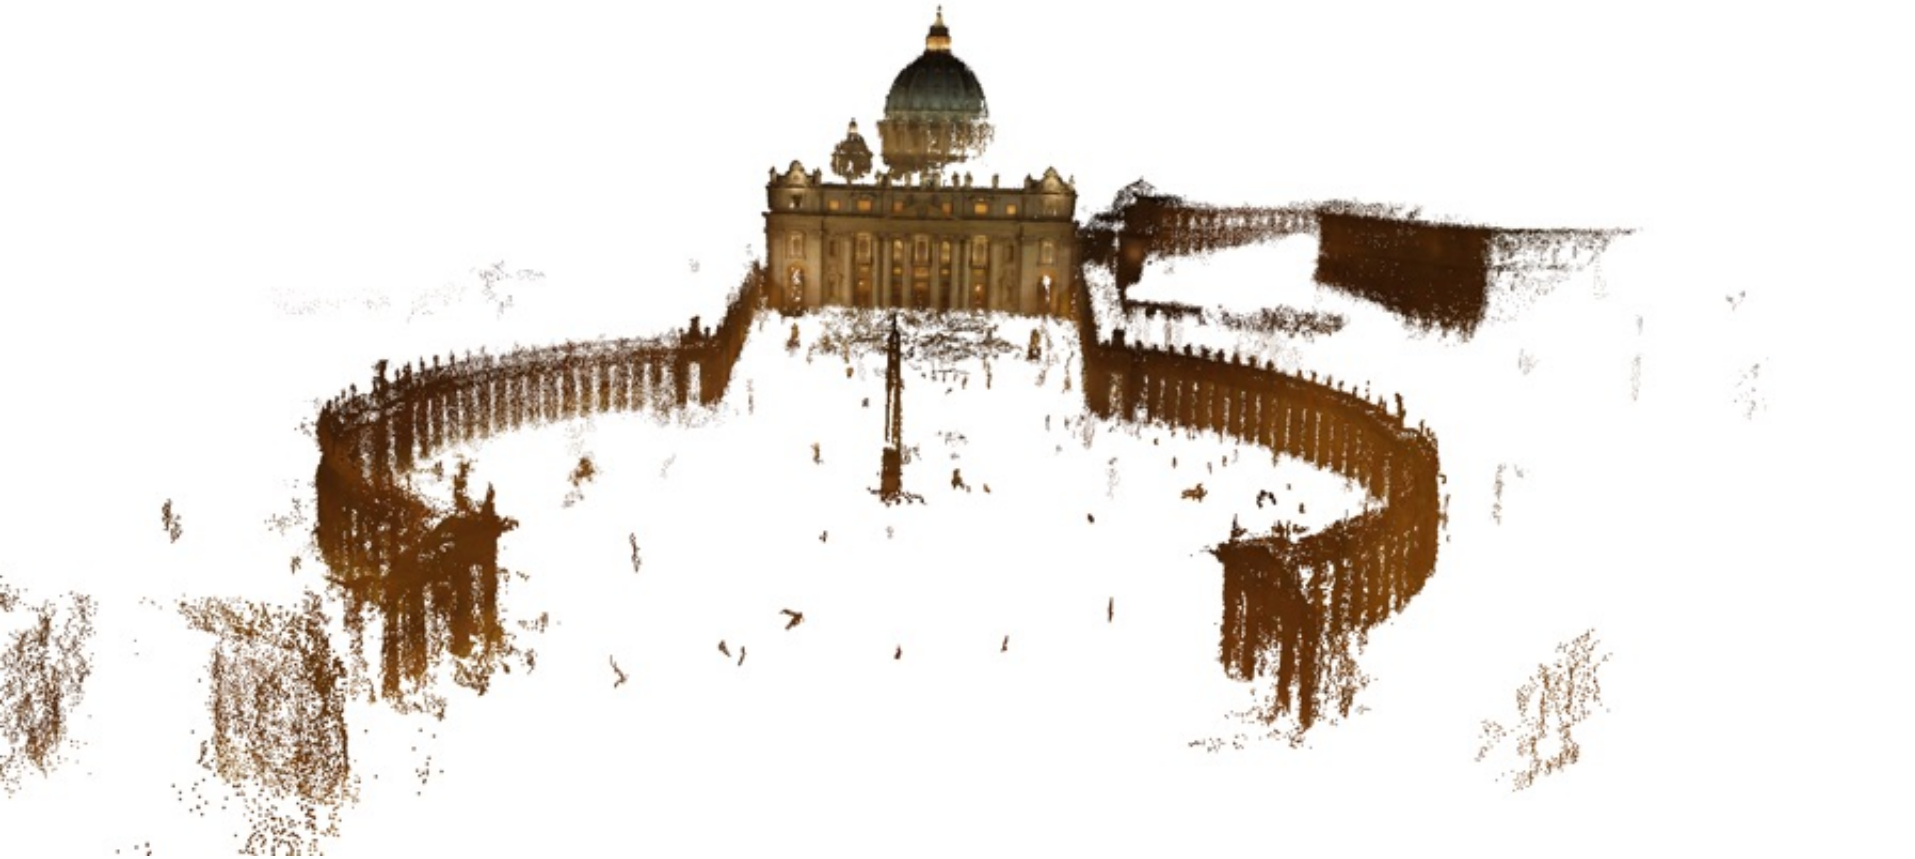

# Pantheon, Rome

Day-only

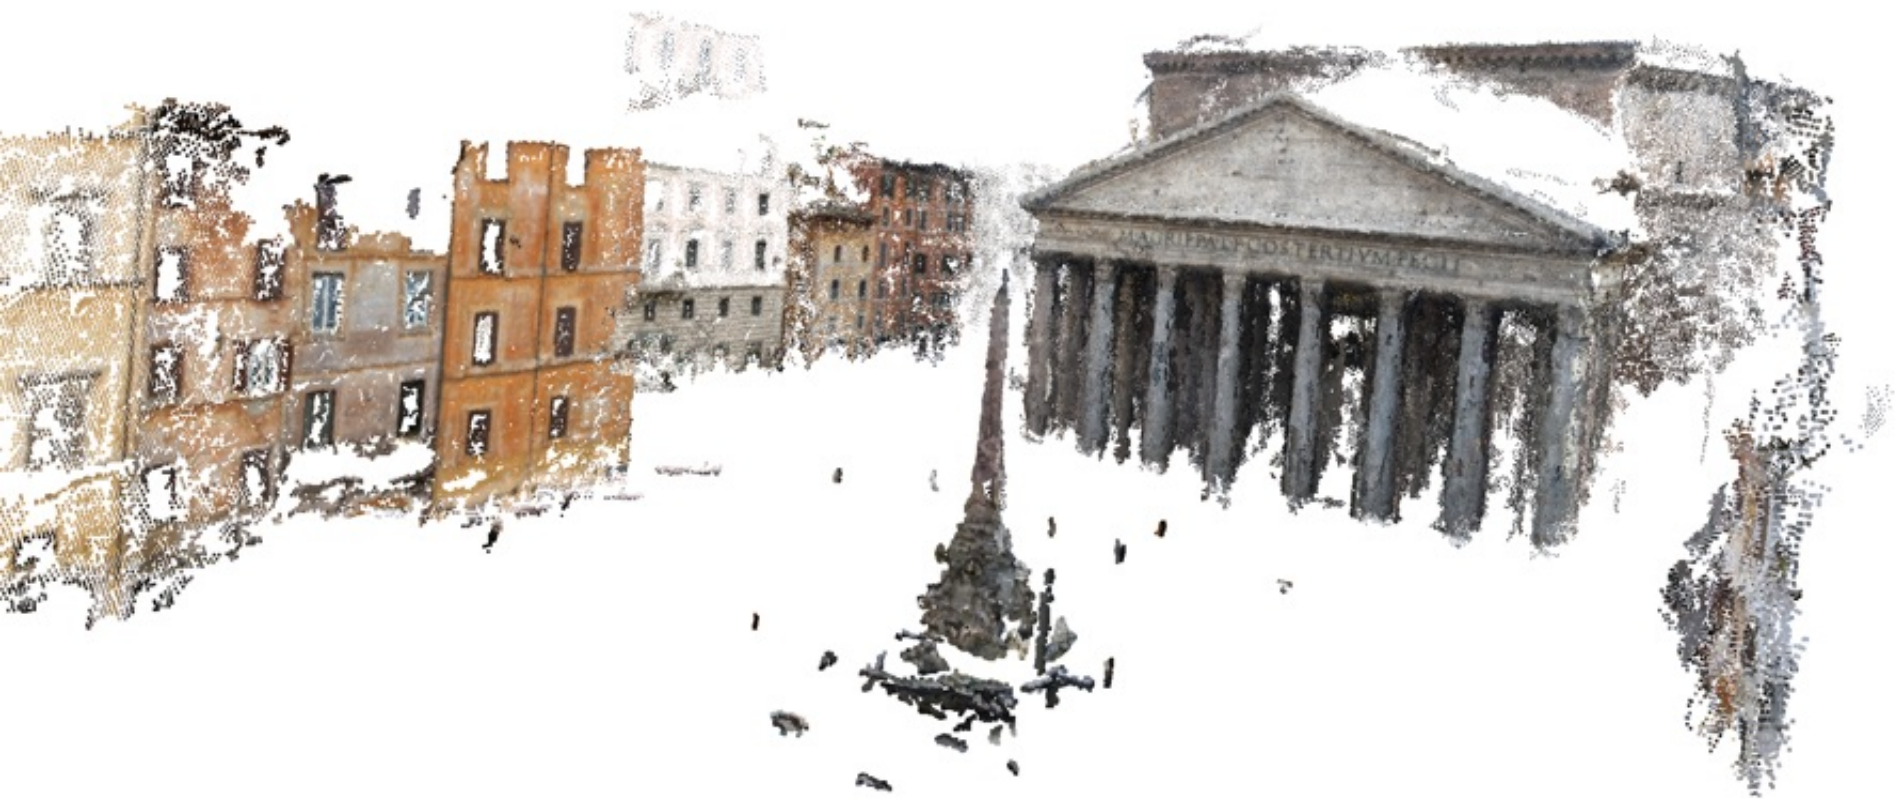

Night-only

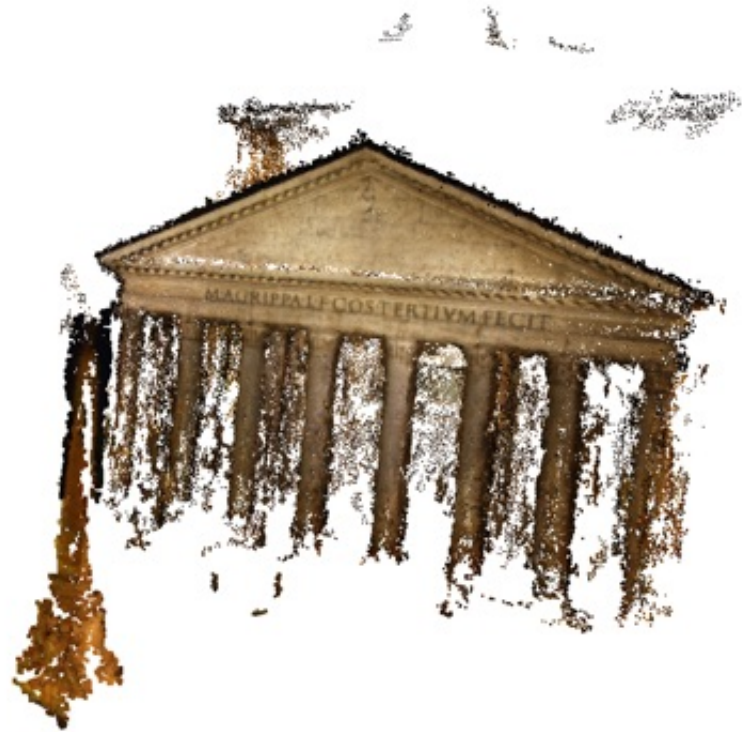

Repainted

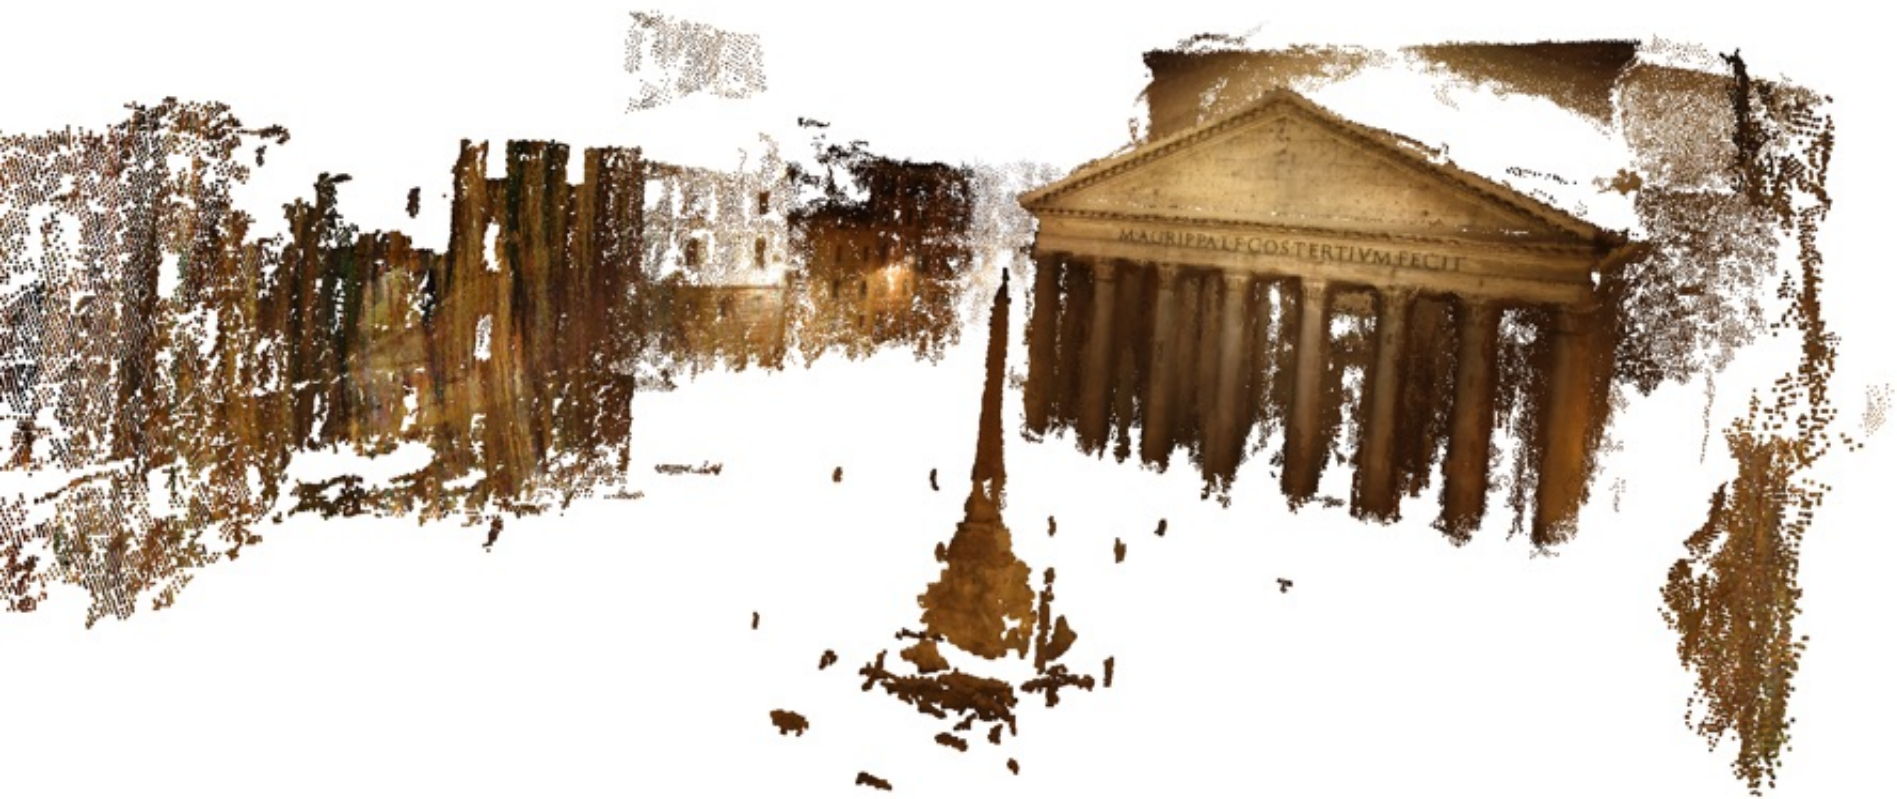

# Repainted+Inpainted+Blended

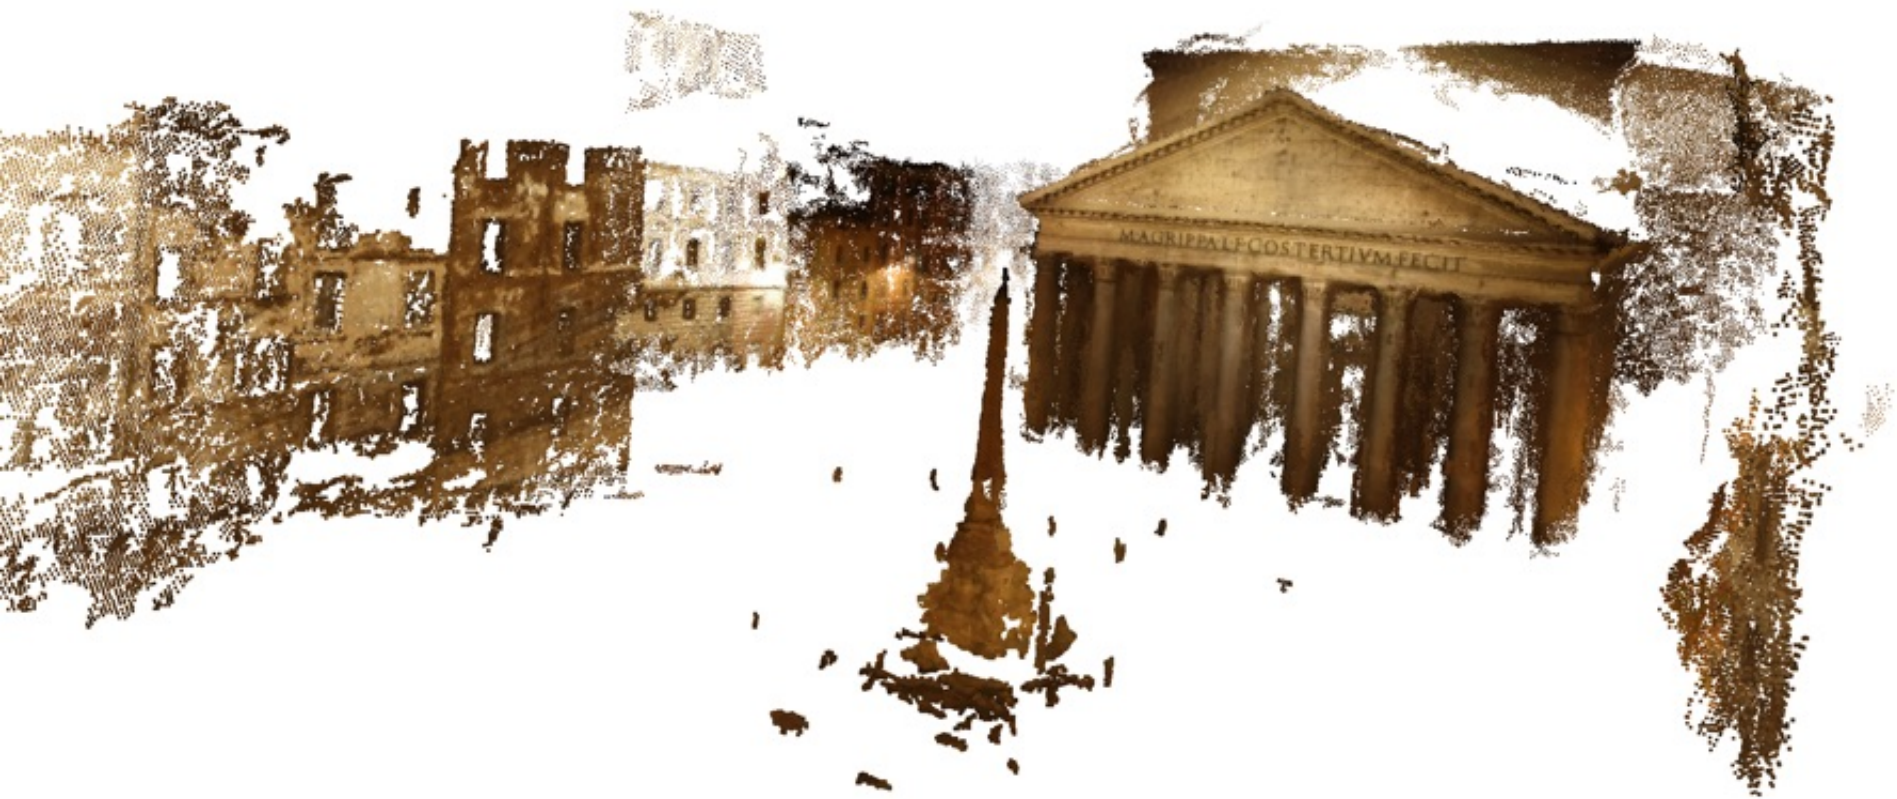

Praça do Comércio, Lisbon

Day-only

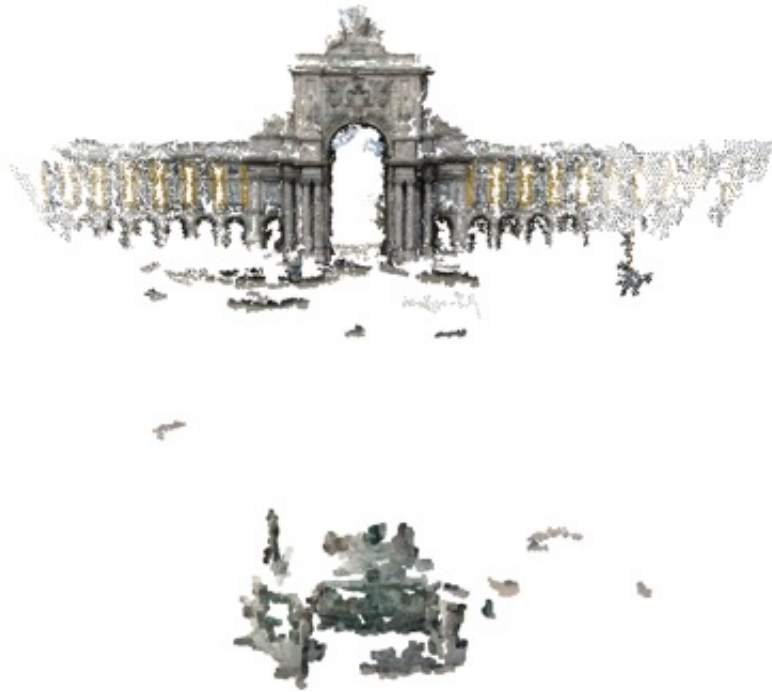

Night-only

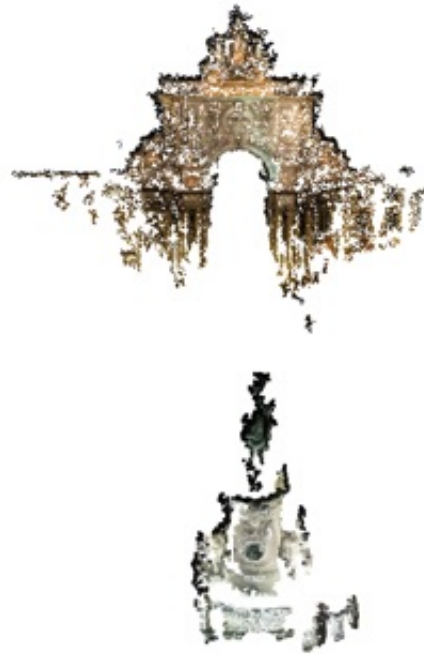

Repainted

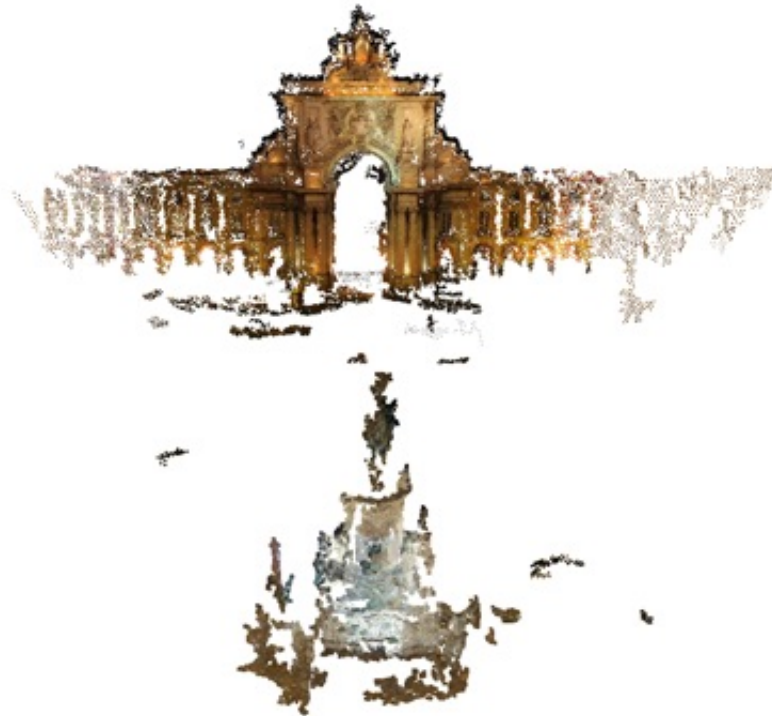

# Repainted+Inpainted+Blended

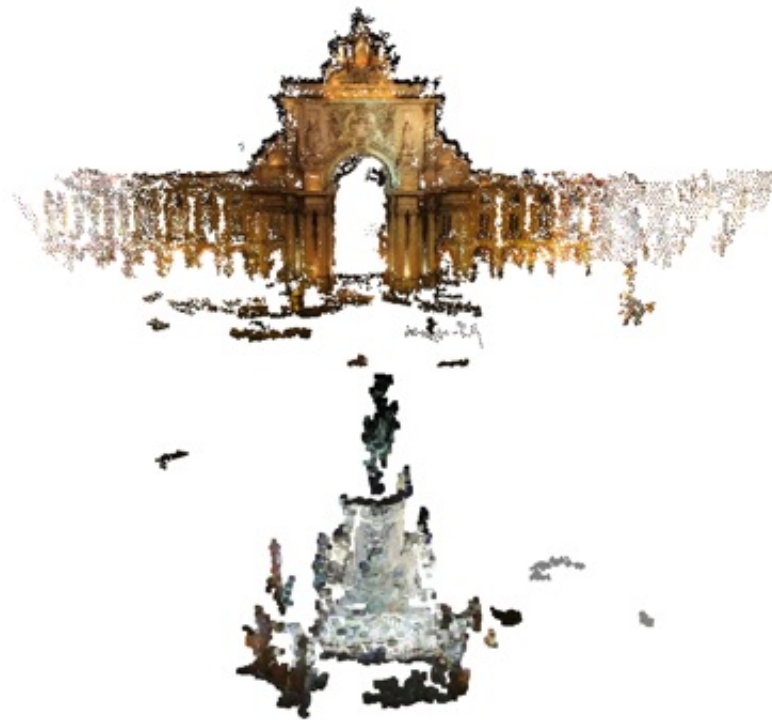

# Saint Francis of Assisi Church, Prague

Day-only

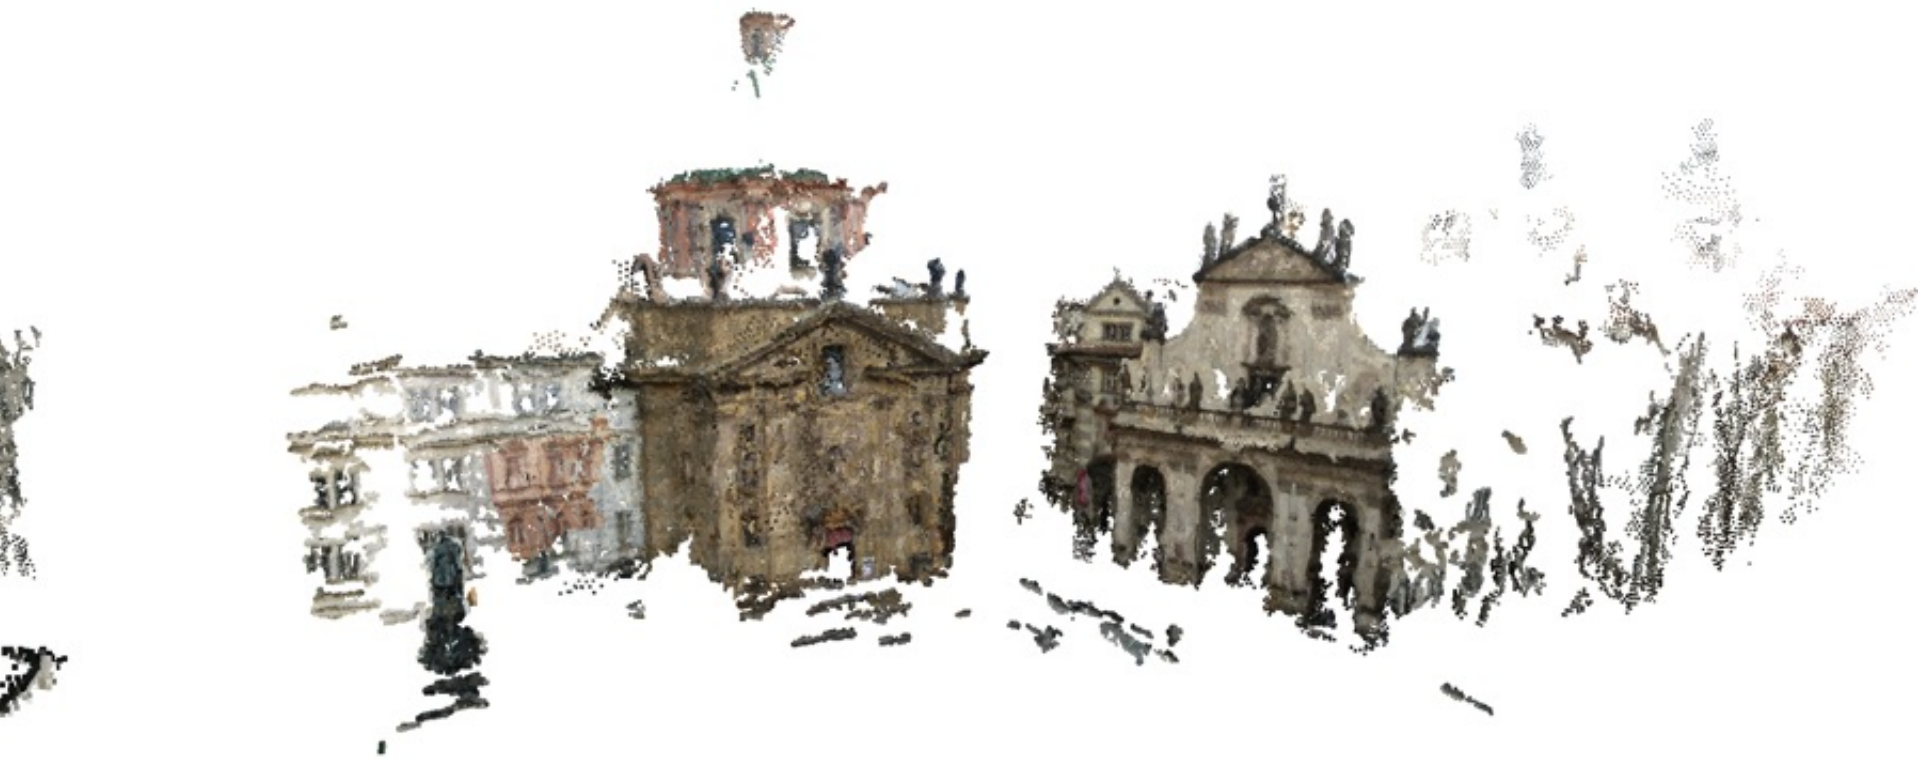

Night-only

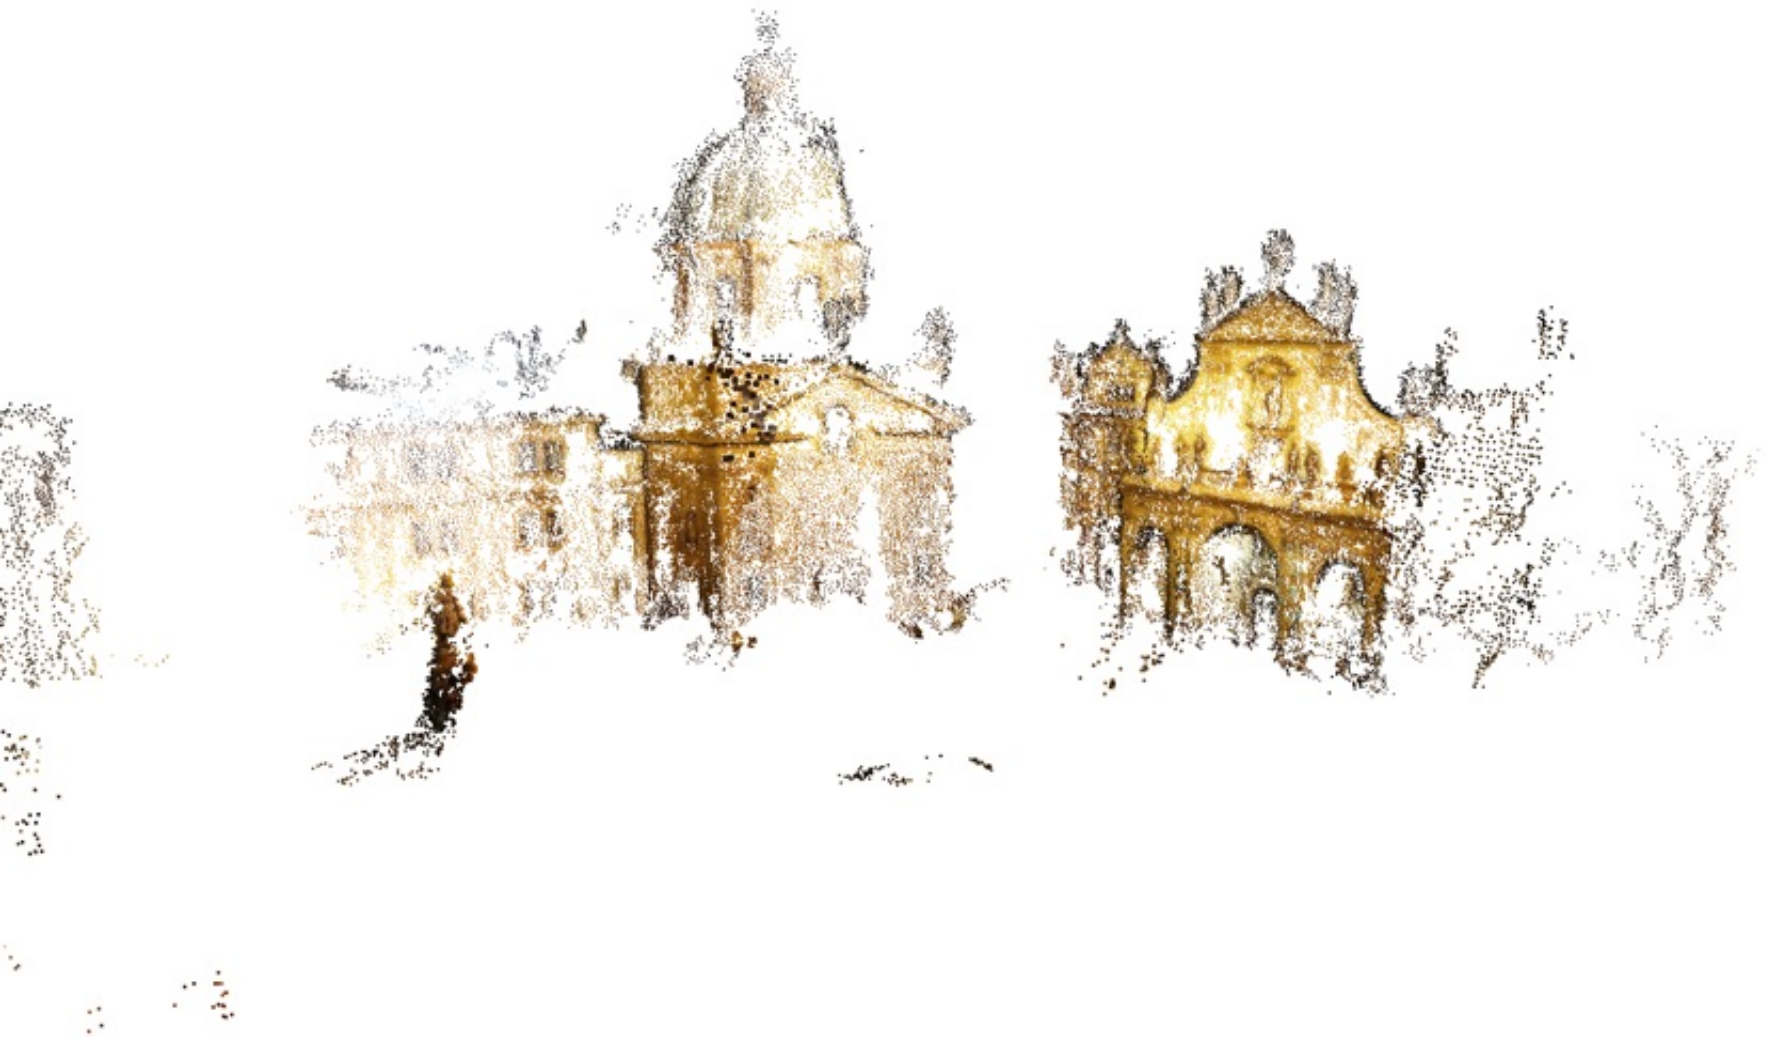

Repainted

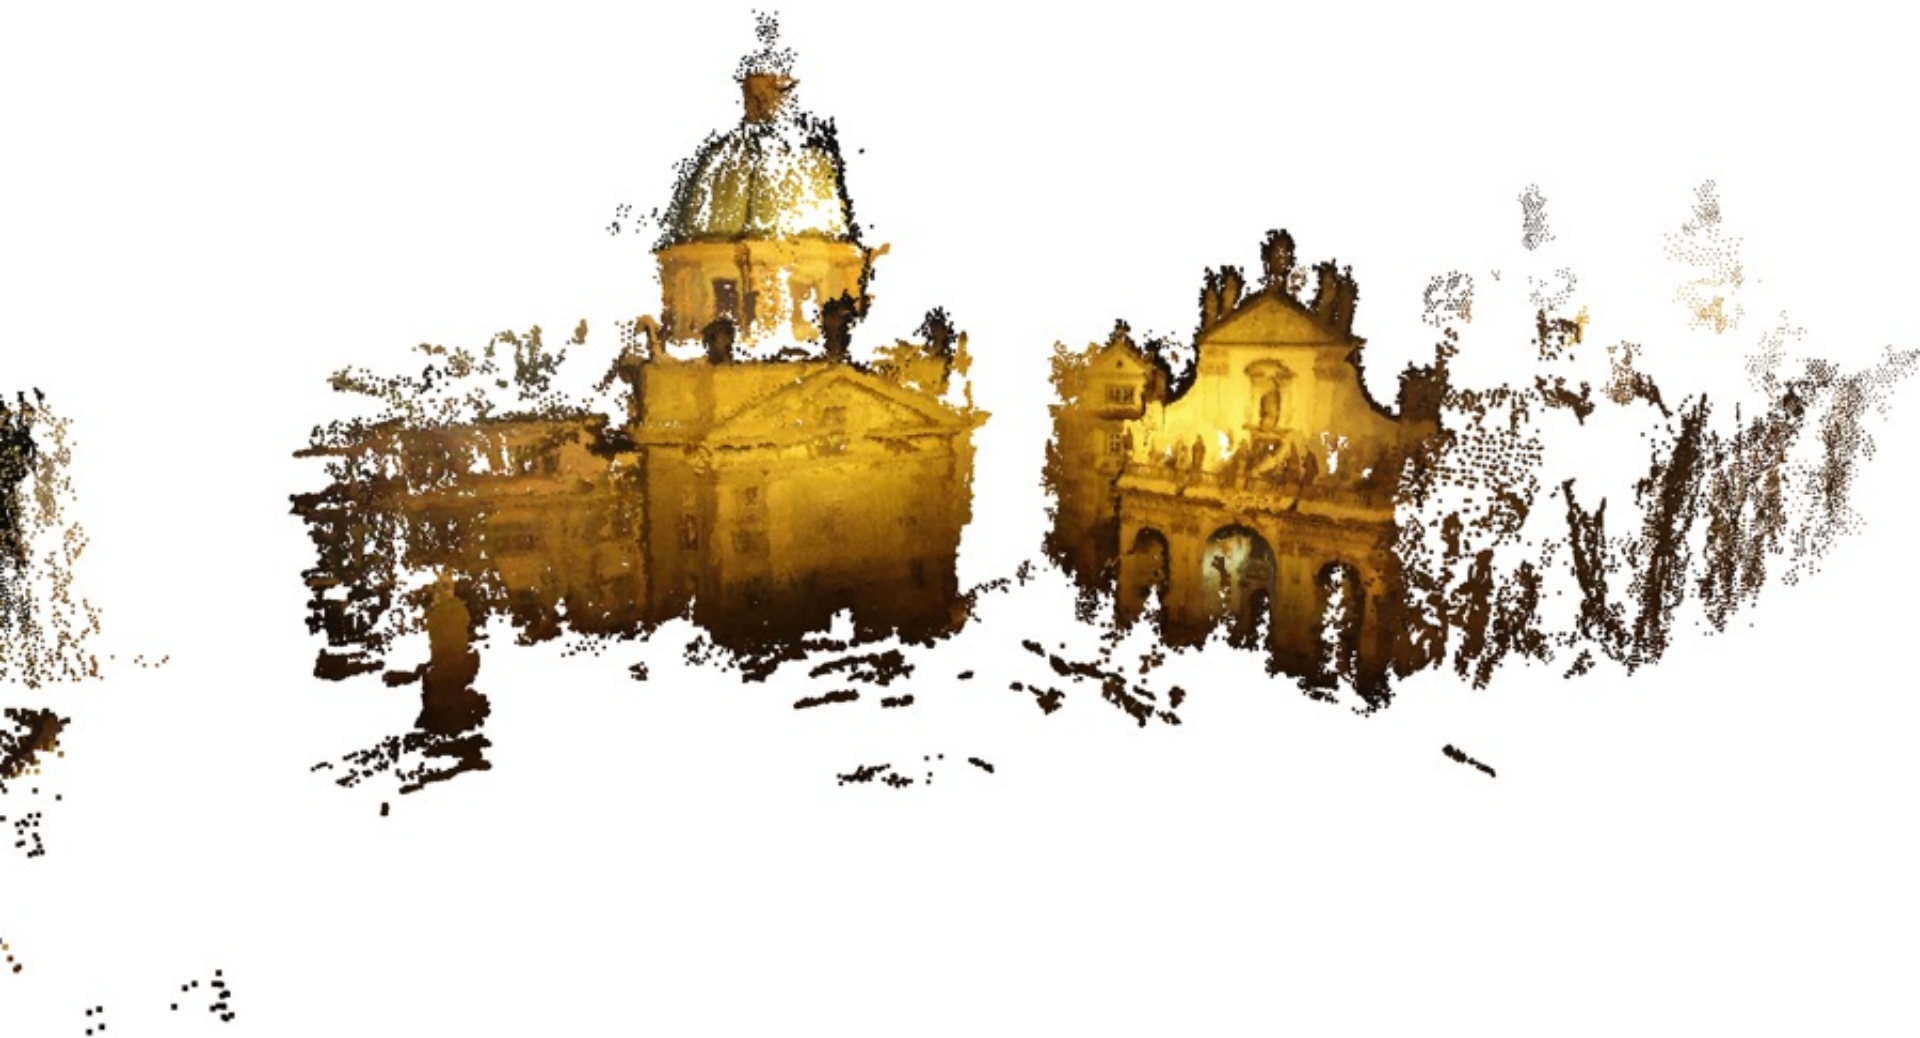

# Repainted+Inpainted+Blended

(All points visible in many night images, hence same as Inpainted)

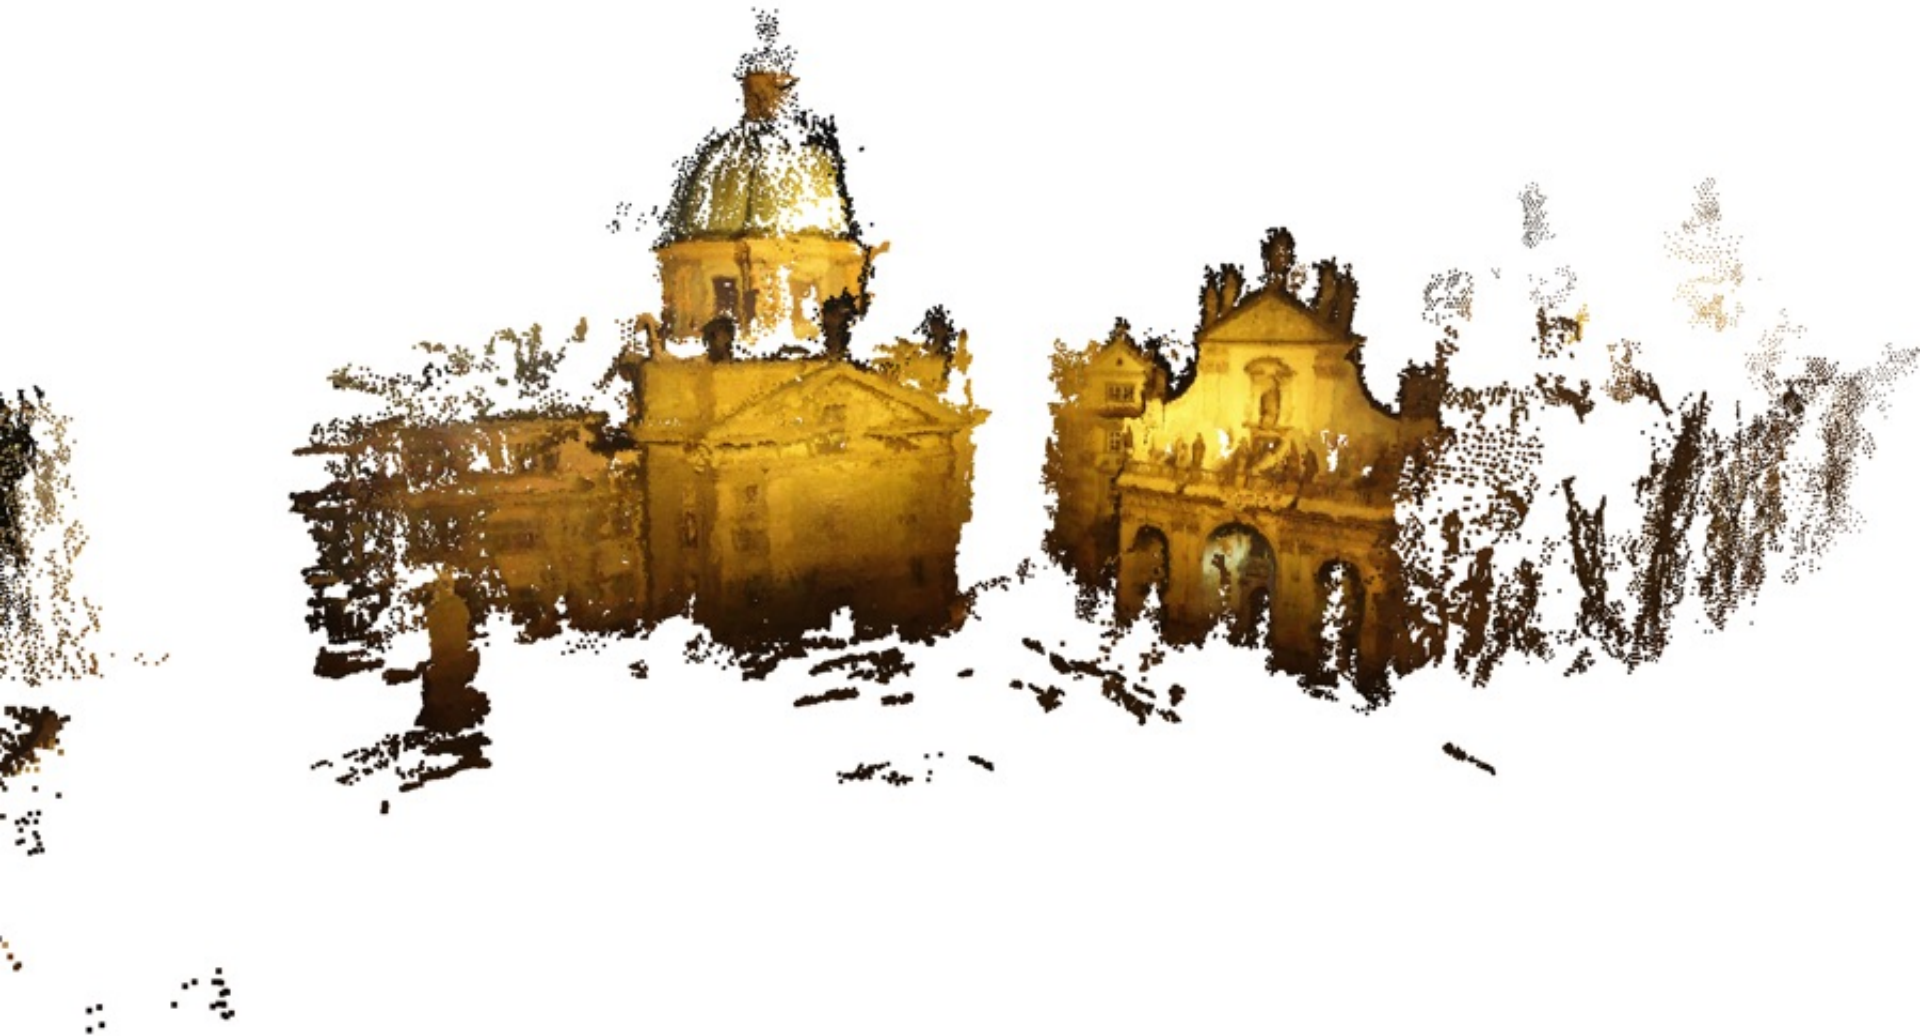

Supplement: Supplementary file 1 [file Radenovic_From_Dusk_Till_2016_CVPR_supplemental.zip › doc.pdf]
